# Supplementary material for: Reaction mechanism study on reactions of phenylacetylenes with HSnEt3promoted by B(C6F5)3with and without DABCO
Source: Royal Society of Chemistry journal article supplement (doi:10.1039/d2qo00375a), 2022-01-01
Supplement: d2qo00375a1.pdf [file d2qo00375a1.pdf]

## Supporting Information

# Reaction Mechanism Study on Reactions of Phenylacetylenes with $\text{HSnEt}_3$ Promoted by $\text{B}(\text{C}_6\text{F}_5)_3$ with/without DABCO

Tianhong Yan, Yahui Li, Shaofei Ni, Li Dang \*

*Department of Chemistry and Key Laboratory for Preparation and Application of Ordered Structural Materials of Guangdong Province, Shantou University, Guangdong 515063, P. R. China*

\* E-mail: ldang@stu.edu.cn

### Table of Contents

|                                                                                                                                               |    |
|-----------------------------------------------------------------------------------------------------------------------------------------------|----|
| Figure S1. Free energy profile for catalyst $\text{B}(\text{C}_6\text{F}_5)_3$ or $\text{HSnEt}_3$ to give <b>P1</b> .....                    | S1 |
| Figure S2. Free energy profile for $\text{HSnEt}_3$ which is supported by DABCO to furnish the <b>P3</b> . .....                              | S1 |
| Figure S3. Free energy profile for dehydrogenative stannylation in the presence of two molecule DABCO .....                                   | S2 |
| Figure S4. Free energy profile for species 10 to occurs the hydrogenation addition reaction to give <b>P1</b> and <b>P2</b> .....             | S2 |
| Figure S5. Free energy profile for species 10 to occurs the hydrogenation addition reaction to give <b>P1</b> and <b>P2</b> .....             | S3 |
| Figure S6. The space filling model of <b>TS2</b> and <b>TS2'</b> .....                                                                        | S3 |
| Figure S7. The energy change plot of IRC calculation for <b>TS4</b> . .....                                                                   | S4 |
| Figure S8. The energy change plot of IRC calculation for <b>TS4'</b> .....                                                                    | S4 |
| Figure S9. The energy change plot of IRC calculation for <b>TS11</b> . .....                                                                  | S4 |
| Table S1. $\Delta E_{\text{gas}}$ , $\Delta G_{\text{gas}}$ , $\Delta E_{\text{sol}}$ calculated for species in the <b>Figure 1</b> .....     | S5 |
| Table S2. $\Delta E_{\text{gas}}$ , $\Delta G_{\text{gas}}$ , $\Delta E_{\text{sol}}$ calculated for species in the <b>Figure 2</b> .....     | S5 |
| Table S3. $\Delta E_{\text{gas}}$ , $\Delta G_{\text{gas}}$ , $\Delta E_{\text{sol}}$ calculated for species in the <b>Figure 3</b> .....     | S5 |
| Table S4. $\Delta E_{\text{gas}}$ , $\Delta G_{\text{gas}}$ , $\Delta E_{\text{sol}}$ calculated for species in the <b>Figure 4</b> .....     | S5 |
| Table S5. $\Delta E_{\text{gas}}$ , $\Delta G_{\text{gas}}$ , $\Delta E_{\text{sol}}$ calculated for species in the <b>Figure 5</b> .....     | S6 |
| Table S6. $\Delta E_{\text{gas}}$ , $\Delta G_{\text{gas}}$ , $\Delta E_{\text{sol}}$ calculated for species in the <b>Figure 6</b> .....     | S6 |
| Table S7. $\Delta E_{\text{gas}}$ , $\Delta G_{\text{gas}}$ , $\Delta E_{\text{sol}}$ calculated for species in the <b>Figure 7</b> .....     | S6 |
| Table S8. $\Delta E_{\text{gas}}$ , $\Delta G_{\text{gas}}$ , $\Delta E_{\text{sol}}$ calculated for species in the <b>Figure S1-S5</b> ..... | S6 |
| Table S9. Absolute Calculation Energies and imaginary frequencies. ....                                                                       | S7 |
| Table S10. TOFs for the pathway in the <b>Figure 1-7</b> . .....                                                                              | S8 |
| Cartesian coordinates for the complexes calculated in this study .....                                                                        | S9 |

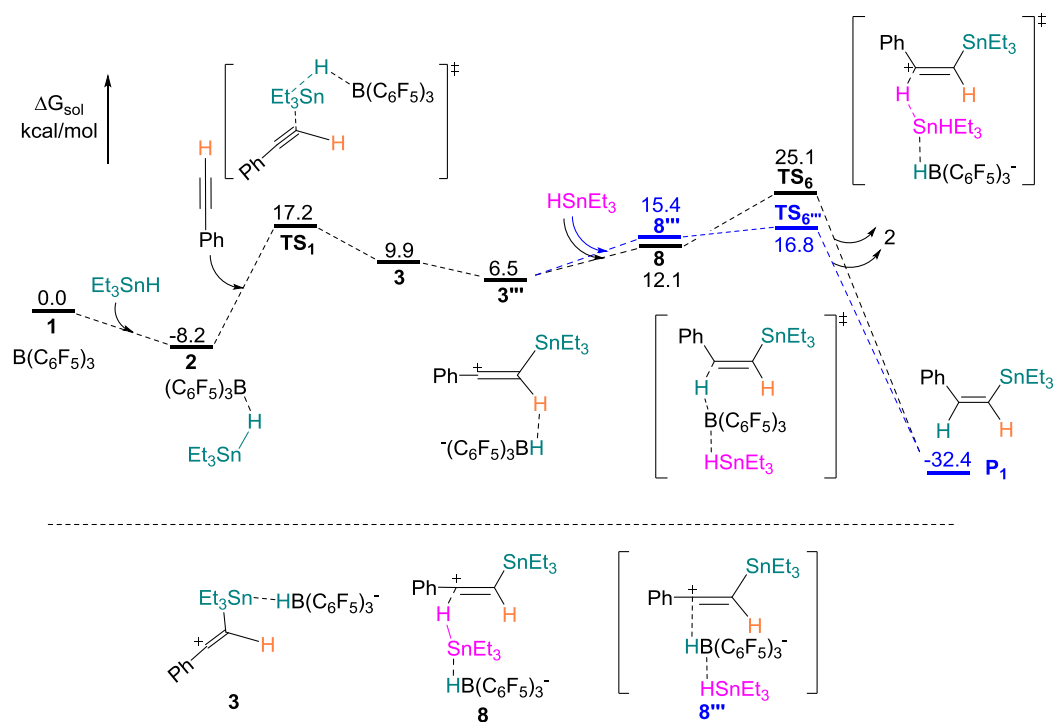

**Figure S1.** Free energy profile for catalyst  $B(C_6F_5)_3$  or  $HSnEt_3$  to give  $P_1$ .

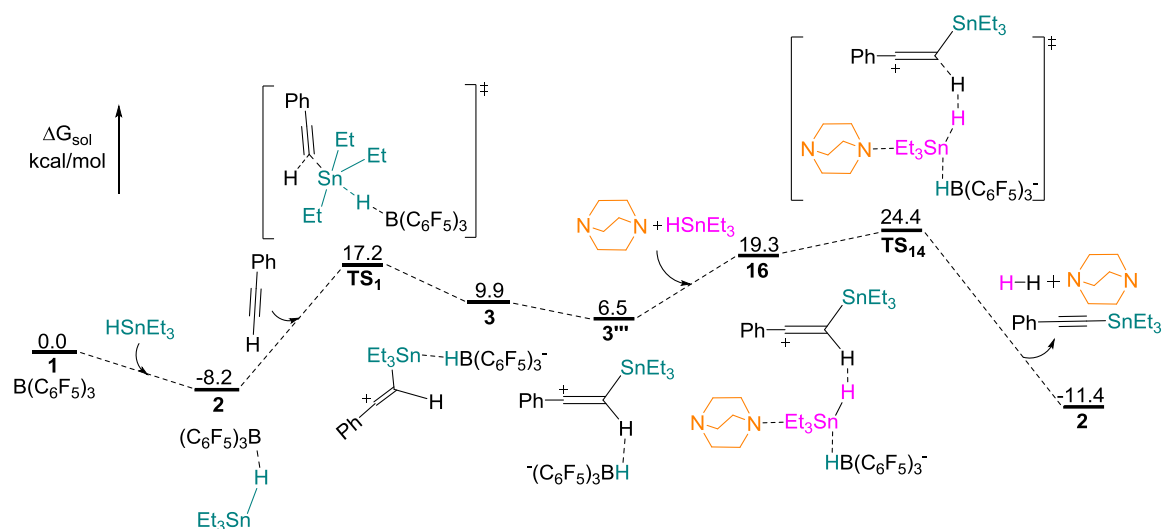

**Figure S2.** Free energy profile for  $HSnEt_3$  which is supported by DABCO to furnish the  $P_3$ .

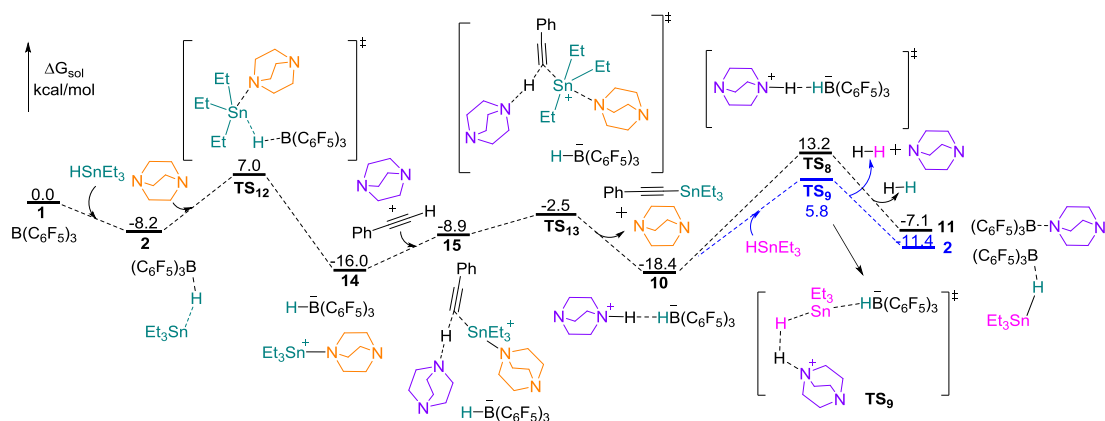

**Figure S3.** Free energy profile for dehydrogenative stannylation in the presence of two molecule DABCO.

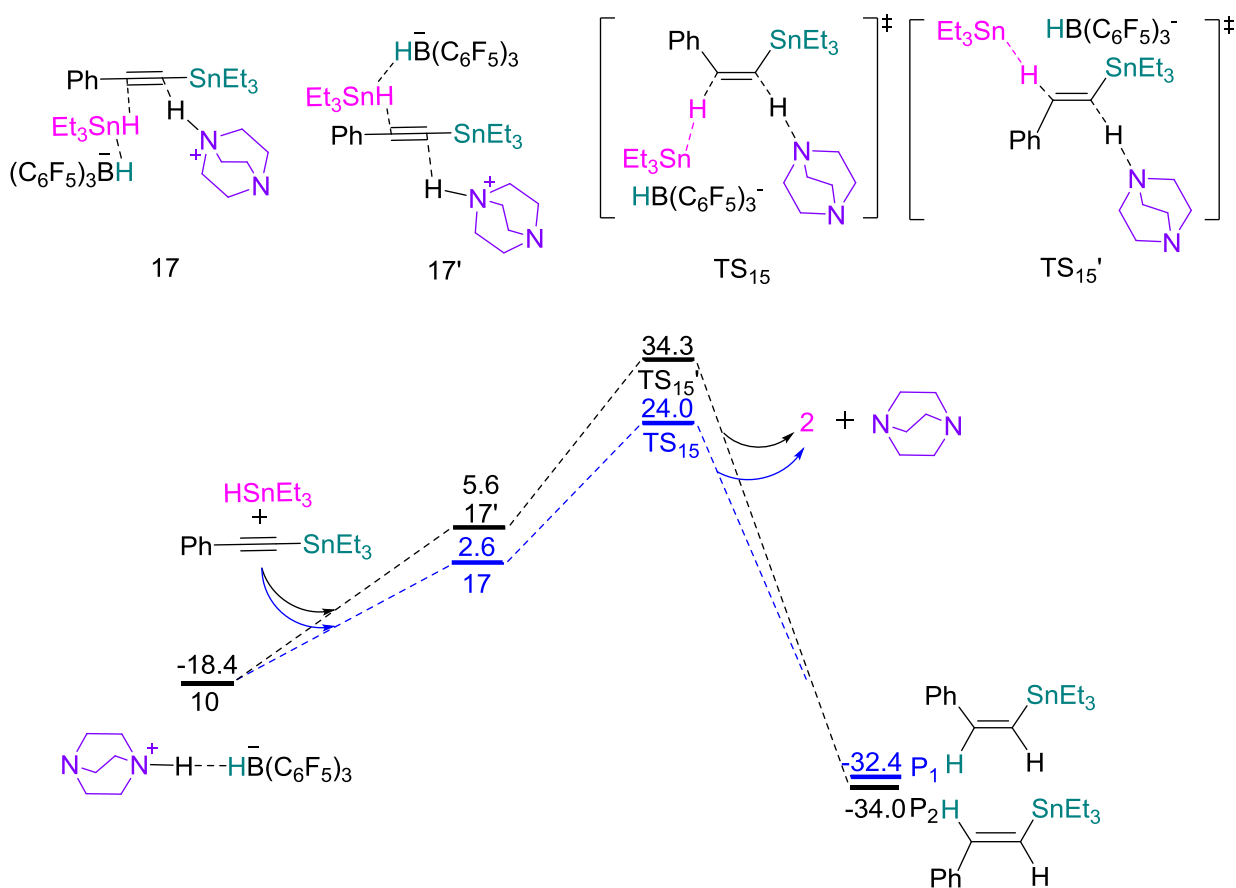

**Figure S4.** Free energy profile for species **10** to occur the hydrogenation addition reaction to give **P1** and **P2**.

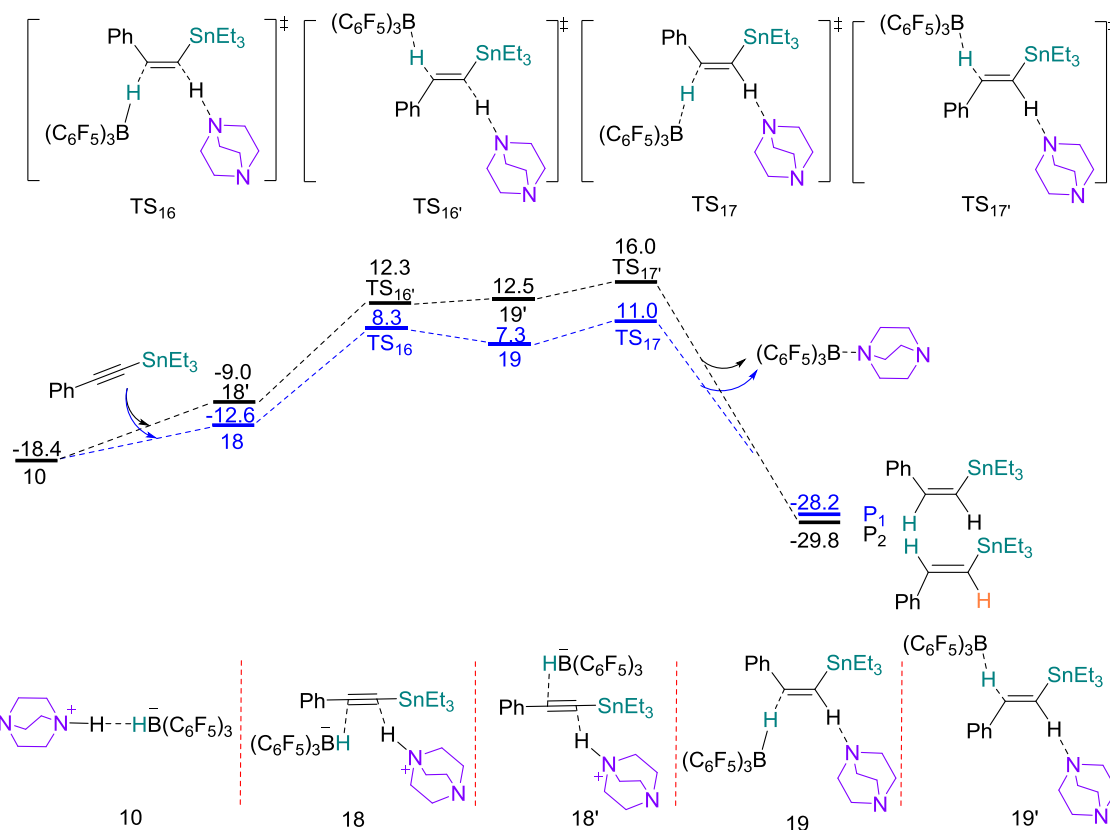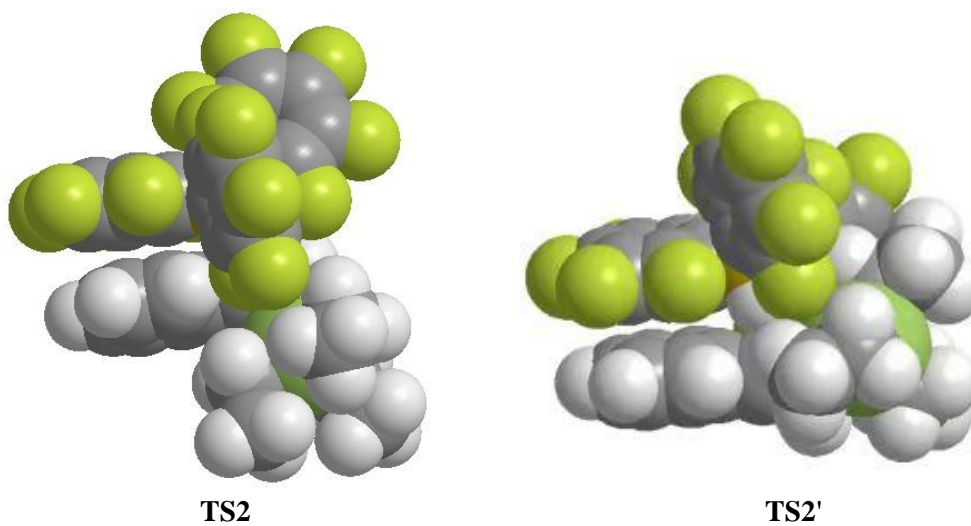

**Figure S6.** The space filling model of **TS2** and **TS2'**.

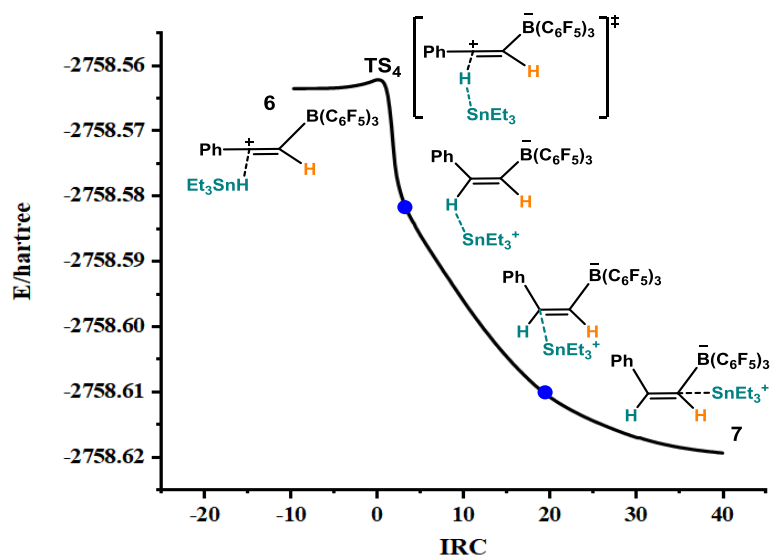

**Figure S7.** The energy change plot of IRC calculation for **TS4**.

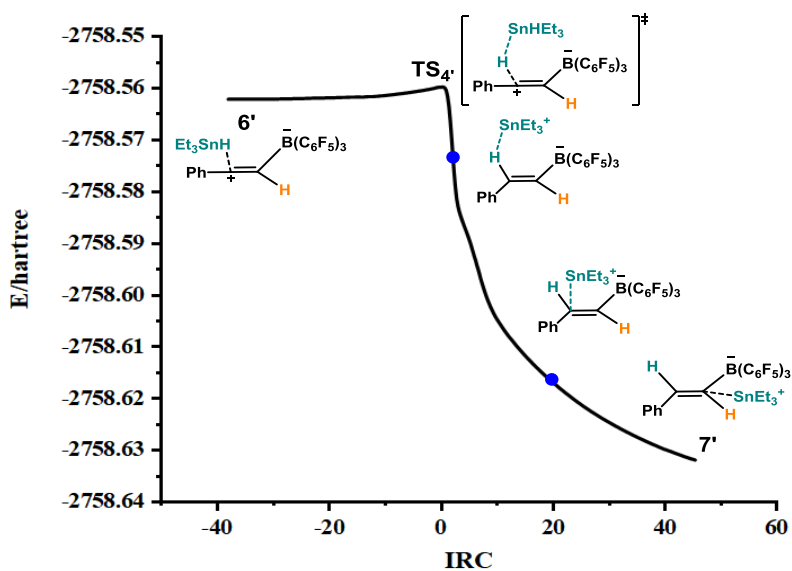

**Figure S8.** The energy change plot of IRC calculation for **TS4'**.

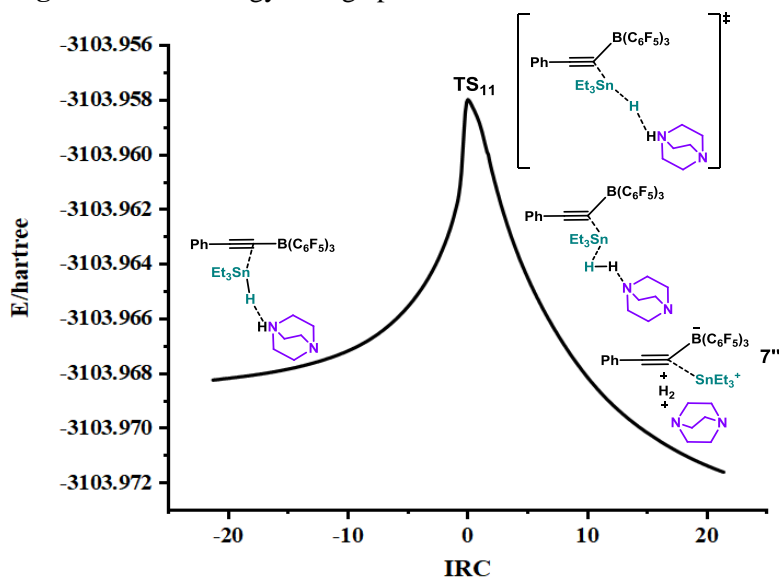

**Figure S9.** The energy change plot of IRC calculation for **TS11**.

**Table S1.**  $\Delta E_{\text{gas}}$ ,  $\Delta G_{\text{gas}}$ ,  $\Delta E_{\text{sol}}$  calculated for species in the **Figure 1**.

| species | $\Delta G_{\text{gas}}$ | $\Delta E_{\text{gas}}$ | $\Delta E_{\text{sol}}$ |
|---------|-------------------------|-------------------------|-------------------------|
| 1       | 0.0                     | 0.0                     | 0.0                     |
| 2       | -6.5                    | -23.0                   | -24.7                   |
| Ts1     | 14.9                    | -16.9                   | -14.5                   |
| 3       | 10.8                    | -20.1                   | -21.0                   |
| 3'      | 10.9                    | -20.5                   | -19.8                   |
| 3''     | 7.3                     | -21.3                   | -21.9                   |
| Ts2     | 10.8                    | -19.3                   | -17.7                   |
| Ts2'    | 14.8                    | -17.4                   | -15.9                   |
| P1      | -28.3                   | -45.6                   | -41.5                   |
| P2      | -29.1                   | -45.1                   | -41.9                   |

**Table S2.**  $\Delta E_{\text{gas}}$ ,  $\Delta G_{\text{gas}}$ ,  $\Delta E_{\text{sol}}$  calculated for species in the **Figure 2**.

| species | $\Delta G_{\text{gas}}$ | $\Delta E_{\text{gas}}$ | $\Delta E_{\text{sol}}$ |
|---------|-------------------------|-------------------------|-------------------------|
| 4       | 2.1                     | -11.8                   | -9.8                    |
| Ts3     | 8.6                     | -6.0                    | -3.5                    |
| 5       | 8.6                     | -5.7                    | -4.9                    |
| 6       | 12.4                    | -14.1                   | -10.8                   |
| 6'      | 15.6                    | -14.5                   | -12.7                   |
| Ts4     | 14.0                    | -14.5                   | -11.0                   |
| Ts4'    | 18.4                    | -13.0                   | -10.4                   |
| 7       | -19.8                   | -56.8                   | -54.9                   |
| 7'      | -25.5                   | -61.7                   | -60.5                   |
| Ts5     | -13.1                   | -50.5                   | -45.2                   |
| Ts5'    | -15.9                   | -53.9                   | -47.1                   |

**Table S3.**  $\Delta E_{\text{gas}}$ ,  $\Delta G_{\text{gas}}$ ,  $\Delta E_{\text{sol}}$  calculated for species in the **Figure 3**.

| species | $\Delta G_{\text{gas}}$ | $\Delta E_{\text{gas}}$ | $\Delta E_{\text{sol}}$ |
|---------|-------------------------|-------------------------|-------------------------|
| 3'''    | 6.4                     | -22.8                   | -22.7                   |
| 8       | 11.2                    | -34.3                   | -33.5                   |
| 8'      | 22.5                    | -23.3                   | -21.7                   |
| Ts6     | 24.8                    | -20.0                   | -19.8                   |
| Ts6'    | 25.5                    | -21.6                   | -18.5                   |
| P1      | -34.8                   | -68.6                   | -66.2                   |
| P2      | -35.6                   | -68.2                   | -66.6                   |

**Table S4.**  $\Delta E_{\text{gas}}$ ,  $\Delta G_{\text{gas}}$ ,  $\Delta E_{\text{sol}}$  calculated for species in the **Figure 4**.

| species | $\Delta G_{\text{gas}}$ | $\Delta E_{\text{gas}}$ | $\Delta E_{\text{sol}}$ |
|---------|-------------------------|-------------------------|-------------------------|
| 8''     | 20.1                    | -24.6                   | -25.7                   |
| Ts2''   | 11.8                    | -14.6                   | -8.4                    |
| Ts6''   | 21.7                    | -21.9                   | -16.5                   |
| P3      | -6.3                    | -6.2                    | -3.1                    |
| P3      | -12.8                   | -29.2                   | -27.8                   |

| species | $\Delta G_{\text{gas}}$ | $\Delta E_{\text{gas}}$ | $\Delta E_{\text{sol}}$ |
|---------|-------------------------|-------------------------|-------------------------|
|---------|-------------------------|-------------------------|-------------------------|

|       |       |       |       |
|-------|-------|-------|-------|
| 6''   | 11.7  | -15.2 | -12.1 |
| TS4'' | 27.7  | 0.3   | -0.2  |
| 7''   | -10.4 | -30.0 | -27.6 |
| TS5'' | 1.2   | -19.8 | -13.0 |

**Table S5.**  $\Delta E_{\text{gas}}$ ,  $\Delta G_{\text{gas}}$ ,  $\Delta E_{\text{sol}}$  calculated for species in the **Figure 5**.

**Table S6.**  $\Delta E_{\text{gas}}$ ,  $\Delta G_{\text{gas}}$ ,  $\Delta E_{\text{sol}}$  calculated for species in the **Figure 6**.

| species | $\Delta G_{\text{gas}}$ | $\Delta E_{\text{gas}}$ | $\Delta E_{\text{sol}}$ |
|---------|-------------------------|-------------------------|-------------------------|
| 9       | -4.2                    | -48.0                   | -44.5                   |
| TS7     | 2.3                     | -39.8                   | -39.3                   |
| 10      | -11.9                   | -39.0                   | -45.6                   |
| TS8     | 9.7                     | -12.6                   | -9.0                    |
| TS9     | 5.9                     | -33.5                   | -33.6                   |
| 11      | -6.3                    | -6.2                    | -3.1                    |
| 2       | -12.8                   | -29.2                   | -27.8                   |

**Table S7.**  $\Delta E_{\text{gas}}$ ,  $\Delta G_{\text{gas}}$ ,  $\Delta E_{\text{sol}}$  calculated for species in the **Figure 7**.

| species | $\Delta G_{\text{gas}}$ | $\Delta E_{\text{gas}}$ | $\Delta E_{\text{sol}}$ |
|---------|-------------------------|-------------------------|-------------------------|
| 12      | -17.3                   | -42.3                   | -18.8                   |
| TS10    | 8.9                     | -19.1                   | -13.6                   |
| 13      | -10.7                   | -41.1                   | -46.1                   |
| TS11    | 12.4                    | -31.6                   | -29.8                   |

**Table S8.**  $\Delta E_{\text{gas}}$ ,  $\Delta G_{\text{gas}}$ ,  $\Delta E_{\text{sol}}$  calculated for species in the **Figure S1-S5**.

| species | $\Delta G_{\text{gas}}$ | $\Delta E_{\text{gas}}$ | $\Delta E_{\text{sol}}$ |
|---------|-------------------------|-------------------------|-------------------------|
| 8'''    | 14.7                    | -28.5                   | -27.8                   |
| TS6'''  | 15.9                    | -27.7                   | -26.9                   |
| 16      | 17.5                    | -41.5                   | -39.7                   |
| TS14    | 19.1                    | -40.4                   | -35.1                   |
| TS12    | 5.8                     | -29.7                   | -28.6                   |
| 14      | -8.8                    | -41.2                   | -48.4                   |
| 15      | -8.7                    | -67.9                   | -68.1                   |
| TS13    | -5.9                    | -64.2                   | -60.8                   |
| 17      | 9.8                     | -49.0                   | -56.2                   |
| 17'     | 15.3                    | -43.2                   | -52.9                   |
| TS15    | 19.5                    | -38.5                   | -34.0                   |
| TS15'   | 32.5                    | -26.2                   | -24.5                   |
| 18      | -10.5                   | -57.1                   | -59.2                   |
| 18'     | -3.9                    | -49.1                   | -54.2                   |
| TS16    | 5.2                     | -39.1                   | -36.1                   |
| TS16'   | 9.3                     | -34.0                   | -31.0                   |
| 19      | 3.8                     | -39.3                   | -35.8                   |
| 19'     | 8.9                     | -34.0                   | -30.3                   |
| TS17    | 5.7                     | -39.2                   | -33.9                   |
| TS17'   | 10.5                    | -33.8                   | -28.3                   |

**Table S9.** Absolute Calculation Energies and imaginary frequencies.

| species      | E(gas-B3LYP-D3) <sup>1</sup> | G(corr-B3LYP-D3) <sup>2</sup> | H(corr-B3LYP-D3) <sup>3</sup> | E(soln-CAM-B3LYP-D3) <sup>4</sup> | IF <sup>5</sup> |
|--------------|------------------------------|-------------------------------|-------------------------------|-----------------------------------|-----------------|
| <b>1</b>     | -2208.43470566               | 0.092578                      | 0.183928                      | -2208.28539508                    | -               |
| <b>2</b>     | -2450.14971461               | 0.279839                      | 0.403493                      | -2449.88174779                    | -               |
| <b>Ts1</b>   | -2758.56597500               | 0.383328                      | 0.521449                      | -2758.17492438                    | -67.22          |
| <b>3</b>     | -2758.57103272               | 0.381952                      | 0.523208                      | -2758.18514938                    | -               |
| <b>3'</b>    | -2758.57173642               | 0.382710                      | 0.523119                      | -2758.18321949                    | -               |
| <b>3''</b>   | -2758.57173642               | 0.382710                      | 0.523119                      | -2758.18321949                    | -               |
| <b>Ts2</b>   | -2758.56987930               | 0.380735                      | 0.521875                      | -2758.17991809                    | -24.41          |
| <b>Ts2'</b>  | -2758.56674676               | 0.383977                      | 0.521760                      | -2758.17708661                    | -20.23          |
| <b>P1</b>    | -550.176967787               | 0.267677                      | 0.339769                      | -549.932557365                    | -               |
| <b>P2</b>    | -550.176278276               | 0.265746                      | 0.339841                      | -549.933086503                    | -               |
| <b>4</b>     | -2516.87953582               | 0.193831                      | 0.303084                      | -2516.61032132                    | -               |
| <b>Ts3</b>   | -2516.87030830               | 0.195064                      | 0.301447                      | -2516.60024630                    | -167.40         |
| <b>5</b>     | -2516.86982692               | 0.194485                      | 0.302573                      | -2516.60246117                    | -               |
| <b>6</b>     | -2758.56144967               | 0.374789                      | 0.520431                      | -2758.16891812                    | -               |
| <b>6'</b>    | -2758.56213193               | 0.380715                      | -2758.181417                  | -2758.17190830                    | -               |
| <b>Ts4</b>   | -2758.56217085               | 0.378110                      | 0.519361                      | -2758.16924419                    | -129.13         |
| <b>Ts4'</b>  | -2758.55980761               | 0.382737                      | 0.519142                      | -2758.16837704                    | -130.40         |
| <b>7</b>     | -2758.62953813               | 0.391657                      | 0.526946                      | -2758.23917343                    | -               |
| <b>7'</b>    | -2758.63744037               | 0.390470                      | 0.527014                      | -2758.24809047                    | -               |
| <b>Ts5</b>   | -2758.61948295               | 0.392285                      | 0.525557                      | -2758.22378507                    | -101.67         |
| <b>Ts5'</b>  | -2758.62501313               | 0.393357                      | 0.525829                      | -2758.22679814                    | -77.59          |
| <b>3'''</b>  | -2758.57538578               | 0.379231                      | 0.523136                      | -2758.18788372                    | -               |
| <b>8</b>     | -3000.27211480               | 0.566318                      | 0.741539                      | -2999.76211109                    | -               |
| <b>8'</b>    | -3000.25451623               | 0.566729                      | 0.741416                      | -2999.74332779                    | -               |
| <b>Ts6</b>   | -3000.24928601               | 0.565144                      | 0.740096                      | -2999.74030366                    | -104.04         |
| <b>Ts6'</b>  | -3000.25172679               | 0.568642                      | 0.739927                      | -2999.73824837                    | -193.89         |
| <b>8''</b>   | 3000.25650271                | 0.564842                      | 0.741251                      | -2999.74977987                    | -               |
| <b>Ts2''</b> | -2758.56234552               | 0.374770                      | 0.515076                      | -2758.16518607                    | -246.04         |
| <b>Ts6''</b> | -3000.25224502               | 0.563075                      | 0.736591                      | -2999.73507930                    | -476.25         |
| <b>P3</b>    | -548.938625079               | 0.241398                      | 0.316877                      | -548.700604631                    | -               |
| <b>6''</b>   | -2758.56325739               | 0.375589                      | 0.520441                      | -2758.17095411                    | -               |
| <b>TS4''</b> | -2758.53863462               | 0.376398                      | 0.516681                      | -2758.15205248                    | -48.52          |
| <b>7'''</b>  | -2757.41121506               | 0.365187                      | 0.503313                      | -2757.02491184                    | -               |
| <b>TS5''</b> | -2757.39505387               | 0.367521                      | 0.501975                      | -2757.00179287                    | -99.72          |
| <b>9</b>     | -2862.29663437               | 0.365576                      | 0.496856                      | -2861.88361130                    | -               |
| <b>TS7</b>   | -3103.97108231               | 0.553921                      | 0.714551                      | -3103.47324701                    | -1036.40        |
| <b>10</b>    | -2555.03112924               | 0.288565                      | 0.402029                      | -2554.78268326                    | -               |
| <b>TS8</b>   | -2554.98897524               | 0.280760                      | 0.391782                      | -2554.72445574                    | -136.73         |
| <b>TS9</b>   | -2796.70063835               | 0.469095                      | 0.612877                      | -2796.32072305                    | -563.07         |
| <b>11</b>    | -2553.83672355               | 0.278104                      | 0.380069                      | -2553.58215730                    | -               |
| <b>12</b>    | -2862.29663437               | 0.365576                      | 0.496856                      | -2861.88361130                    | -               |
| <b>TS10</b>  | -2862.25971997               | 0.370442                      | 0.495662                      | -2861.87537023                    | -135.64         |
| <b>13</b>    | -2862.29483426               | 0.374283                      | 0.501000                      | -2861.92710123                    | -               |
| <b>TS11</b>  | -3103.95797380               | 0.556919                      | 0.713098                      | -3103.45822473                    | -573.98         |



|               |                |          |          |                |          |
|---------------|----------------|----------|----------|----------------|----------|
| <b>8'''</b>   | -3000.26277871 | 0.562587 | 0.741305 | -2999.75309868 | -        |
| <b>TS6'''</b> | -3000.26157209 | 0.563233 | 0.740176 | -2999.75157394 | -19.03   |
| <b>16</b>     | -3345.65212146 | 0.741781 | 0.936285 | -3345.03097348 | -        |
| <b>TS14</b>   | -3345.65024441 | 0.742484 | 0.933003 | -3345.02359685 | -39.87   |
| <b>TS12</b>   | -2795.52893243 | 0.464252 | 0.597843 | -2795.14692541 | -25.13   |
| <b>14</b>     | -2795.54724547 | 0.459222 | 0.600013 | -2795.17850283 | -        |
| <b>15</b>     | -3449.38439655 | 0.735085 | 0.914358 | -3448.77816541 | -        |
| <b>TS13</b>   | -3449.37848408 | 0.733634 | 0.910344 | -3448.76658456 | -1010.82 |
| <b>17</b>     | -3345.66394176 | 0.741340 | 0.939772 | -3345.05725996 | -        |
| <b>17'</b>    | -3345.65476587 | 0.740910 | 0.939719 | -3345.05202456 | -        |
| <b>TS15</b>   | -3345.64722552 | 0.740157 | 0.933795 | -3345.02197431 | -127.30  |
| <b>TS15'</b>  | -3345.62767986 | 0.741317 | 0.933292 | -3345.00673810 | -265.75  |
| <b>18</b>     | -3103.99865989 | 0.560977 | 0.721789 | -3103.50510304 | -        |
| <b>18'</b>    | -3103.98585688 | 0.558793 | 0.721931 | -3103.49708932 | -        |
| <b>TS16</b>   | -3103.96989944 | 0.557370 | 0.715088 | -3103.46814222 | -15.63   |
| <b>TS16'</b>  | -3103.96169314 | 0.555678 | 0.714782 | -3103.46007798 | -50.37   |
| <b>19</b>     | -3103.97016270 | 0.555352 | 0.716509 | -3103.46774606 | -        |
| <b>19'</b>    | -3103.96170410 | 0.554957 | 0.716167 | -3103.45900916 | -        |
| <b>TS17</b>   | -3103.97003995 | 0.558259 | 0.715561 | -3103.46471797 | -27.47   |
| <b>TS17-1</b> | -3103.96150146 | 0.557342 | 0.715047 | -3103.45574023 | -57.27   |

<sup>1</sup>The electronic energy calculated by B3LYP-D3 in gas phase. <sup>2</sup>The thermal correction to Gibbs free energy calculated by B3LYP-D3 in gas phase. <sup>3</sup>The thermal correction to enthalpy calculated by B3LYP-D3 in gas phase. <sup>4</sup>The electronic energy calculated by CAM-B3LYP-D3 in toluene solvent. <sup>5</sup>The B3LYP-D3 calculated imaginary frequencies for the transition states.

**Table S10.** TOFs for the pathway in **Figure1-7**.

| TOF/s <sup>-1</sup> | Figure 1              | Figure 2              | Figure 3               | Figure 4               | Figure 5               | Figure 6               | Figure 7               |
|---------------------|-----------------------|-----------------------|------------------------|------------------------|------------------------|------------------------|------------------------|
| Blue line           | 1.41×10 <sup>-6</sup> | 8.52×10 <sup>-7</sup> | 2.25×10 <sup>-12</sup> | 3.66×10 <sup>-7</sup>  | —                      | 1.07×10 <sup>-5</sup>  | —                      |
| Black line          | 1.41×10 <sup>-6</sup> | 2.3×10 <sup>-9</sup>  | 7.19×10 <sup>-15</sup> | 9.08×10 <sup>-14</sup> | 6.47×10 <sup>-14</sup> | 3.98×10 <sup>-11</sup> | 8.34×10 <sup>-10</sup> |

Cartesian coordinates for the complexes calculated in this study: [gas phase results optimized at the level of B3LYP-D3/6-31+G\* (LanI2dz for Sn)]:

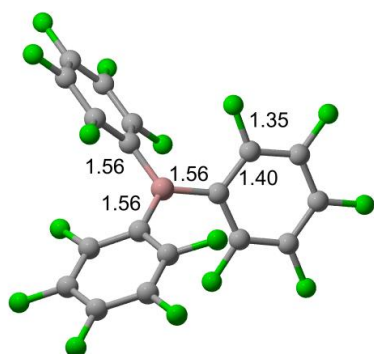

**1**

|   |             |             |             |
|---|-------------|-------------|-------------|
| B | -2.04264900 | 0.43117400  | 0.00007900  |
| C | -2.82436800 | 1.78364900  | -0.00008900 |
| C | -3.99384100 | 1.97083100  | 0.75058600  |
| C | -2.40199300 | 2.89017300  | -0.75072700 |
| C | -4.69575700 | 3.16992500  | 0.77248200  |
| C | -3.08970500 | 4.09747100  | -0.77250700 |
| C | -4.24169700 | 4.23801900  | 0.00002800  |
| C | -2.82229000 | -0.92248700 | 0.00590900  |
| C | -2.39284100 | -2.02834300 | 0.75351000  |
| C | -3.99685600 | -1.11146000 | -0.73631500 |
| C | -3.07855300 | -3.23667800 | 0.78028000  |
| C | -4.69710300 | -2.31161200 | -0.75311300 |
| C | -4.23587400 | -3.37899000 | 0.01607700  |
| C | -0.48045300 | 0.43236600  | -0.00556800 |
| C | 0.26441900  | -0.48861600 | -0.75590000 |
| C | 0.26841500  | 1.35452200  | 0.73932600  |
| C | 1.65374700  | -0.49573700 | -0.78287900 |
| C | 1.65788800  | 1.36382600  | 0.75618800  |
| C | 2.35365800  | 0.43459300  | -0.01588700 |
| F | 2.33149400  | 2.25091400  | 1.49864900  |
| F | -0.35695400 | 2.26627200  | 1.50857100  |
| F | -0.36509400 | -1.40133100 | -1.52060500 |
| F | 2.32331900  | -1.38176000 | -1.53024400 |
| F | 3.68709800  | 0.43564600  | -0.02074400 |
| F | -1.28603100 | -1.93839600 | 1.51567900  |
| F | -4.47787100 | -0.11408400 | -1.50302600 |
| F | -5.80378100 | -2.45273800 | -1.49286900 |
| F | -4.90091600 | -4.53472300 | 0.02086900  |
| F | -2.64182200 | -4.25978100 | 1.52487300  |

|   |             |            |             |
|---|-------------|------------|-------------|
| F | -4.46782800 | 0.97270500 | 1.52069200  |
| F | -5.79728600 | 3.30935800 | 1.52020100  |
| F | -4.90849500 | 5.39274900 | 0.00007700  |
| F | -2.65989500 | 5.12125600 | -1.52018500 |
| F | -1.30056500 | 2.80193000 | -1.52085000 |

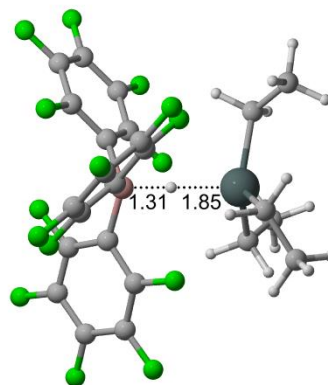

**2**

|   |             |             |             |
|---|-------------|-------------|-------------|
| C | -0.21673400 | 1.31144200  | 2.23140500  |
| C | 0.86501400  | 2.19129700  | 2.23271200  |
| C | -0.28705900 | 0.46516300  | 3.33880600  |
| C | 1.82888900  | 2.24064500  | 3.23198400  |
| C | 0.65045500  | 0.48111800  | 4.37012400  |
| C | 1.71873600  | 1.37222700  | 4.31522300  |
| C | -2.16430800 | 2.65990900  | 0.87600600  |
| C | -2.47604200 | 3.52060100  | 1.92929100  |
| C | -2.68974000 | 3.03143900  | -0.36101800 |
| C | -3.24520600 | 4.67198200  | 1.76959700  |
| C | -3.45476800 | 4.17160300  | -0.57262800 |
| C | -3.73522600 | 5.00279800  | 0.50912800  |
| C | -2.05542200 | -0.06433200 | 0.75676900  |
| C | -3.42565400 | -0.25215000 | 0.94267900  |
| C | -1.36229800 | -1.19221100 | 0.31895400  |
| C | -4.06704800 | -1.46641300 | 0.70392700  |
| C | -1.95647100 | -2.42099500 | 0.06010200  |
| C | -3.32859300 | -2.55818700 | 0.25554200  |
| H | -0.49644800 | 1.39978700  | -0.02742000 |
| C | 0.50333200  | 3.60306200  | -1.94477300 |
| H | 0.03727200  | 3.71603300  | -2.93030800 |
| H | -0.19052900 | 4.03920800  | -1.21774300 |
| C | 1.86375200  | 4.31399400  | -1.88337800 |
| H | 2.57746800  | 3.90269000  | -2.60793000 |

|    |             |             |             |   |             |             |             |
|----|-------------|-------------|-------------|---|-------------|-------------|-------------|
| H  | 1.75448500  | 5.38246700  | -2.10749300 | C | -0.78233500 | 1.65861400  | 1.96188700  |
| H  | 2.31535700  | 4.23272100  | -0.88888600 | C | -0.05003200 | 2.84820400  | 1.99116100  |
| C  | -0.40626000 | 0.19177900  | -2.86834700 | C | -1.43493400 | 1.35929100  | 3.16061400  |
| H  | 0.25463800  | -0.66063800 | -3.06293900 | C | 0.07734700  | 3.66402700  | 3.10971200  |
| H  | -1.27683100 | -0.20181300 | -2.33222000 | C | -1.33878100 | 2.14551900  | 4.30815200  |
| C  | -0.84236900 | 0.87219600  | -4.17488200 | C | -0.57180800 | 3.30516300  | 4.28705700  |
| H  | 0.01059700  | 1.27255900  | -4.73678400 | C | -1.63832500 | 1.78027400  | -0.50618900 |
| H  | -1.35630500 | 0.15908400  | -4.83150400 | C | -2.96802100 | 2.16415000  | -0.31493400 |
| H  | -1.53430600 | 1.70002800  | -3.98607600 | C | -1.00403200 | 2.40665300  | -1.57396400 |
| C  | 2.45734100  | 0.79243800  | -0.68792300 | C | -3.64307100 | 3.06138800  | -1.13547000 |
| H  | 3.17896800  | 1.61642800  | -0.72829900 | C | -1.63380300 | 3.31463200  | -2.42156700 |
| H  | 2.27115400  | 0.59021100  | 0.37259100  | C | -2.96766200 | 3.64034000  | -2.20768900 |
| C  | 3.00089700  | -0.46276000 | -1.38731500 | C | -1.48578800 | -0.69820500 | 0.74545200  |
| H  | 2.29814500  | -1.29975900 | -1.31526900 | C | -2.54990500 | -1.28111800 | 0.05112100  |
| H  | 3.20265300  | -0.28782800 | -2.45138500 | C | -0.83723700 | -1.56939100 | 1.62885200  |
| B  | -1.28130300 | 1.32183900  | 1.02368600  | C | -2.95589300 | -2.60644700 | 0.22666600  |
| F  | 2.85448800  | 3.10441600  | 3.16130100  | C | -1.19885200 | -2.89363600 | 1.83322200  |
| F  | 2.63114100  | 1.39595600  | 5.29443400  | C | -2.27628100 | -3.42073500 | 1.12382700  |
| F  | 0.53380400  | -0.35238000 | 5.41407400  | H | 0.26936100  | 0.61995500  | 0.14025300  |
| F  | -1.30725400 | -0.40936700 | 3.46814400  | C | 3.09827600  | -0.01825500 | -2.92459700 |
| F  | -1.22944800 | -3.46264000 | -0.37507500 | H | 4.12210400  | -0.34200900 | -2.68290200 |
| F  | -3.93041200 | -3.72954000 | 0.01542300  | H | 2.70004800  | -0.74833500 | -3.63512000 |
| F  | 1.01465900  | 3.06342500  | 1.19713400  | C | 3.12279600  | 1.39169700  | -3.53145700 |
| F  | -2.05198400 | 3.25046100  | 3.18210000  | H | 3.73538300  | 1.41724700  | -4.44207000 |
| F  | -3.51806100 | 5.46357100  | 2.81701400  | H | 2.12045000  | 1.73631200  | -3.80000200 |
| F  | -4.47021800 | 6.10837400  | 0.33763200  | H | 3.54209400  | 2.12487800  | -2.83263000 |
| F  | -3.91669200 | 4.47714200  | -1.79583000 | C | 2.15029600  | -2.13391800 | -0.15754600 |
| F  | -2.44674900 | 2.24897900  | -1.44930800 | H | 3.23463600  | -2.32562100 | -0.15195400 |
| F  | -4.19940100 | 0.75700100  | 1.39571300  | H | 1.84976600  | -2.04076300 | 0.88889400  |
| F  | -5.38719400 | -1.59369900 | 0.90180800  | C | 1.41724900  | -3.28881600 | -0.84631600 |
| F  | -0.01769100 | -1.10975900 | 0.11667700  | H | 1.66665700  | -3.36204000 | -1.91118900 |
| H  | 3.94350800  | -0.78596800 | -0.92814300 | H | 1.67829200  | -4.24559200 | -0.37692300 |
| Sn | 0.60805200  | 1.50515900  | -1.50904500 | H | 0.33064000  | -3.18331600 | -0.76967000 |
|    |             |             |             | C | 2.94893400  | 1.32793100  | 0.21550500  |
|    |             |             |             | H | 3.98378200  | 1.39929400  | -0.15049900 |
|    |             |             |             | H | 2.46862300  | 2.28586300  | 0.00987300  |
|    |             |             |             | C | 2.91380200  | 0.99392600  | 1.71067900  |
|    |             |             |             | H | 1.89179600  | 0.85268800  | 2.07046100  |
|    |             |             |             | H | 3.47138500  | 0.07731400  | 1.93816500  |
|    |             |             |             | B | -0.89726400 | 0.81232000  | 0.56954000  |
|    |             |             |             | F | 0.81484900  | 4.78795400  | 3.06417300  |
|    |             |             |             | F | -0.46581700 | 4.07181600  | 5.38228300  |
|    |             |             |             | F | -1.98491800 | 1.79566900  | 5.43297600  |
|    |             |             |             | F | -2.22507000 | 0.26734700  | 3.26866900  |

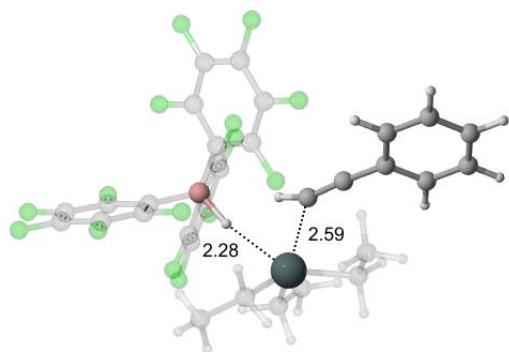

TS1

|    |             |             |             |   |             |             |             |
|----|-------------|-------------|-------------|---|-------------|-------------|-------------|
| F  | -0.51821400 | -3.67176000 | 2.69095800  | C | -0.29696400 | 2.66718700  | 4.81129900  |
| F  | -2.64024100 | -4.69885500 | 1.29494200  | C | -1.50051300 | 1.32289700  | -0.04329900 |
| F  | 0.58548100  | 3.27128500  | 0.86938600  | C | -2.84349700 | 1.61005400  | 0.21400700  |
| F  | -3.65687200 | 1.65283200  | 0.72743800  | C | -0.98084200 | 1.96734200  | -1.16088100 |
| F  | -4.92723800 | 3.37879700  | -0.90771700 | C | -3.62747600 | 2.44221600  | -0.57814100 |
| F  | -3.59181700 | 4.50774200  | -3.01857000 | C | -1.72458200 | 2.80441900  | -1.99006600 |
| F  | -0.96143100 | 3.88080700  | -3.44726900 | C | -3.06129800 | 3.04482800  | -1.69993200 |
| F  | 0.31457100  | 2.17516900  | -1.84726100 | C | -1.08623600 | -1.17371300 | 1.07431100  |
| F  | -3.23791700 | -0.58504100 | -0.88254100 | C | -2.07715800 | -1.81844700 | 0.32826300  |
| F  | -3.98380500 | -3.10396000 | -0.47974200 | C | -0.37204300 | -2.02936500 | 1.92265700  |
| F  | 0.22010800  | -1.11990900 | 2.34839100  | C | -2.36130500 | -3.18359100 | 0.42597400  |
| H  | 3.36145600  | 1.80508600  | 2.29936800  | C | -0.61469100 | -3.38987200 | 2.05363400  |
| C  | 0.64948300  | -1.15147500 | -5.66994000 | C | -1.62575500 | -3.97761500 | 1.29575900  |
| C  | 0.83553600  | -0.81635500 | -7.00686800 | H | 0.51585600  | 0.33534700  | 0.52418000  |
| C  | 0.47774600  | 0.45747200  | -7.46556600 | C | 3.93800500  | -1.47821200 | -2.77152000 |
| C  | -0.07130300 | 1.39874600  | -6.58762900 | H | 4.84881400  | -2.00905400 | -2.46312000 |
| C  | -0.26235400 | 1.07528900  | -5.24817100 | H | 3.37912200  | -2.18159300 | -3.40071600 |
| C  | 0.10149400  | -0.20422200 | -4.77795100 | C | 4.30304100  | -0.21156600 | -3.56218000 |
| H  | 0.91939800  | -2.13584900 | -5.30048800 | H | 4.90483300  | -0.45656700 | -4.44662100 |
| H  | 1.25755800  | -1.54417900 | -7.69331100 | H | 3.41349100  | 0.32338100  | -3.91149400 |
| H  | 0.62581900  | 0.71564400  | -8.51029400 | H | 4.88676500  | 0.49008800  | -2.95521000 |
| H  | -0.34799700 | 2.38537400  | -6.94638900 | C | 2.71965500  | -2.84896100 | 0.30258900  |
| H  | -0.67693300 | 1.80138800  | -4.56029800 | H | 3.76811800  | -3.09846700 | 0.51717200  |
| C  | -0.09061500 | -0.54333800 | -3.41920200 | H | 2.27149900  | -2.54133500 | 1.25068400  |
| C  | -0.16017800 | -0.81025000 | -2.22262600 | C | 1.99273100  | -4.06247700 | -0.29147800 |
| H  | -0.69309700 | -1.18994200 | -1.37069900 | H | 2.45283700  | -4.39832100 | -1.22880500 |
| Sn | 2.05711300  | -0.17045100 | -1.04240400 | H | 2.01368900  | -4.90634000 | 0.40855900  |

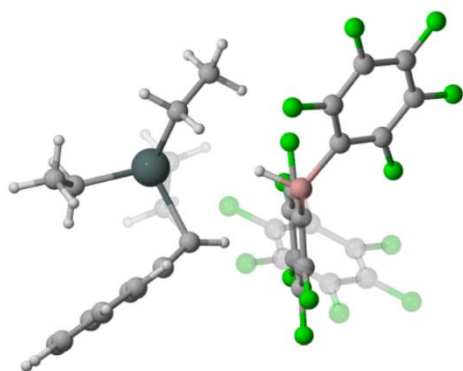

**3**

|   |             |            |            |   |             |             |             |
|---|-------------|------------|------------|---|-------------|-------------|-------------|
| C | -0.53229100 | 1.16445800 | 2.39844000 | H | 4.11945700  | 1.15514300  | -0.53115200 |
| C | 0.25374700  | 2.31379100 | 2.50261800 | H | 2.39058700  | 1.45275100  | -0.31639700 |
| C | -1.21067800 | 0.82038100 | 3.56772900 | C | 3.36329100  | 0.66418400  | 1.46376700  |
| C | 0.39029000  | 3.06207800 | 3.66733600 | H | 2.44774100  | 0.29615200  | 1.93489200  |
| C | -1.10627000 | 1.53726600 | 4.75880900 | H | 4.18495600  | -0.00423300 | 1.75015700  |
|   |             |            |            | B | -0.61440300 | 0.39077700  | 0.96218500  |
|   |             |            |            | F | 1.17443600  | 4.15695900  | 3.70005900  |
|   |             |            |            | F | -0.18220900 | 3.37084500  | 5.94995700  |
|   |             |            |            | F | -1.77892000 | 1.14912500  | 5.85731900  |
|   |             |            |            | F | -2.02206600 | -0.26322100 | 3.59980900  |
|   |             |            |            | F | 0.12946600  | -4.15075000 | 2.87624300  |
|   |             |            |            | F | -1.86683500 | -5.29420500 | 1.39033000  |
|   |             |            |            | F | 0.93429900  | 2.76414700  | 1.41642000  |
|   |             |            |            | F | -3.44444500 | 1.04634400  | 1.28404600  |
|   |             |            |            | F | -4.91932000 | 2.66759800  | -0.28420800 |

|    |             |             |             |    |             |             |             |
|----|-------------|-------------|-------------|----|-------------|-------------|-------------|
| F  | -3.79520800 | 3.84794400  | -2.48739900 | H  | 3.61444100  | 1.03232700  | 4.70108800  |
| F  | -1.15501200 | 3.38063800  | -3.07437000 | C  | 2.91123300  | -1.56619800 | 0.19622600  |
| F  | 0.32641400  | 1.80837800  | -1.52088600 | C  | 2.87280100  | -2.29082400 | -0.83268500 |
| F  | -2.81671400 | -1.13982500 | -0.58175600 | Sn | 1.64738100  | -1.91741700 | -2.71241700 |
| F  | -3.32451000 | -3.73749800 | -0.33091100 | C  | 2.01879000  | 0.11186400  | -3.31457200 |
| F  | 0.64392900  | -1.53035700 | 2.67104100  | H  | 2.74565100  | 0.04233900  | -4.13375200 |
| H  | 3.57586300  | 1.65150900  | 1.89038900  | H  | 1.08499000  | 0.48836300  | -3.74318900 |
| C  | 1.00770300  | -1.53002200 | -5.27457800 | C  | 2.76839800  | -3.27690600 | -3.96075900 |
| C  | 1.15164900  | -1.13076200 | -6.59686100 | H  | 2.41306900  | -3.13442200 | -4.99048200 |
| C  | 1.01358300  | 0.22233300  | -6.93633900 | H  | 3.82083800  | -2.96456900 | -3.95864900 |
| C  | 0.73000300  | 1.18303500  | -5.95759100 | C  | -0.28092300 | -2.77887100 | -2.36517200 |
| C  | 0.58860300  | 0.80184700  | -4.62873400 | H  | -0.11928200 | -3.73680600 | -1.85794800 |
| C  | 0.73087500  | -0.56274900 | -4.27928400 | H  | -0.84002000 | -2.13778100 | -1.68620400 |
| H  | 1.10421400  | -2.57317200 | -4.99112300 | C  | 2.52568300  | 1.05309600  | -2.21575800 |
| H  | 1.36675500  | -1.86605500 | -7.36590900 | H  | 3.48481600  | 0.71264700  | -1.80683700 |
| H  | 1.12492100  | 0.52850000  | -7.97267500 | H  | 2.68219400  | 2.06339900  | -2.61412700 |
| H  | 0.61875000  | 2.22727000  | -6.23196800 | H  | 1.81757500  | 1.13274600  | -1.38891000 |
| H  | 0.37515200  | 1.53141400  | -3.85676500 | C  | 2.63304100  | -4.75131300 | -3.55420300 |
| C  | 0.59827400  | -0.95316900 | -2.93824800 | H  | 3.21125600  | -5.40814300 | -4.21665000 |
| C  | 0.60429100  | -1.25871800 | -1.73505900 | H  | 2.99437800  | -4.93388500 | -2.53292800 |
| H  | -0.04913000 | -1.53047200 | -0.91323800 | H  | 1.58998500  | -5.08684700 | -3.58979800 |
| Sn | 2.80024300  | -1.12260900 | -0.97552300 | C  | -1.04491000 | -2.97143200 | -3.68528200 |
|    |             |             |             | H  | -1.25585800 | -2.01266000 | -4.17265800 |
|    |             |             |             | H  | -0.49666700 | -3.60059300 | -4.39803500 |
|    |             |             |             | H  | -2.01063500 | -3.45853400 | -3.50020900 |
|    |             |             |             | H  | 3.44818400  | -3.20088000 | -0.98696600 |
|    |             |             |             | B  | -0.55509100 | 0.59954500  | 0.46406000  |
|    |             |             |             | C  | -0.01266700 | 1.27242300  | 1.85143400  |
|    |             |             |             | C  | 1.04955900  | 2.17897700  | 1.80144500  |
|    |             |             |             | C  | -0.51740100 | 1.05839900  | 3.13603700  |
|    |             |             |             | C  | 1.56144000  | 2.84807300  | 2.90429000  |
|    |             |             |             | C  | -0.03020200 | 1.69690300  | 4.27624300  |
|    |             |             |             | C  | 1.01816000  | 2.60096600  | 4.16170400  |
|    |             |             |             | C  | -1.07469900 | 1.73037300  | -0.60538100 |
|    |             |             |             | C  | -1.42044500 | 3.05346800  | -0.32246500 |
|    |             |             |             | C  | -1.19638000 | 1.39475700  | -1.95195400 |
|    |             |             |             | C  | -1.81368500 | 3.97643400  | -1.29055600 |
|    |             |             |             | C  | -1.58152100 | 2.27373000  | -2.95777000 |
|    |             |             |             | C  | -1.88991700 | 3.58783600  | -2.62414800 |
|    |             |             |             | C  | -1.69410300 | -0.55054900 | 0.68007400  |
|    |             |             |             | C  | -3.06381900 | -0.28207000 | 0.73641600  |
|    |             |             |             | C  | -1.37429900 | -1.90078400 | 0.79313900  |
|    |             |             |             | C  | -4.04209600 | -1.26443500 | 0.86743500  |
|    |             |             |             | C  | -2.31064000 | -2.92179900 | 0.92646200  |
| C  | 4.18052500  | 0.89343700  | 2.62538500  | C  |             |             |             |
| C  | 3.96969900  | 0.24469100  | 1.42173700  | C  |             |             |             |
| C  | 3.00004400  | -0.79342200 | 1.34381200  | C  |             |             |             |
| C  | 2.23053000  | -1.13602900 | 2.48945500  | C  |             |             |             |
| C  | 2.47128100  | -0.48872200 | 3.69131200  | C  |             |             |             |
| C  | 3.43954400  | 0.52072400  | 3.75903000  | C  |             |             |             |
| H  | 4.90559200  | 1.69746700  | 2.69230900  | C  |             |             |             |
| H  | 4.53122000  | 0.51349900  | 0.53374000  | C  |             |             |             |
| H  | 1.47429200  | -1.90621400 | 2.40415300  | C  |             |             |             |
| H  | 1.89480900  | -0.75015900 | 4.57236500  | C  |             |             |             |

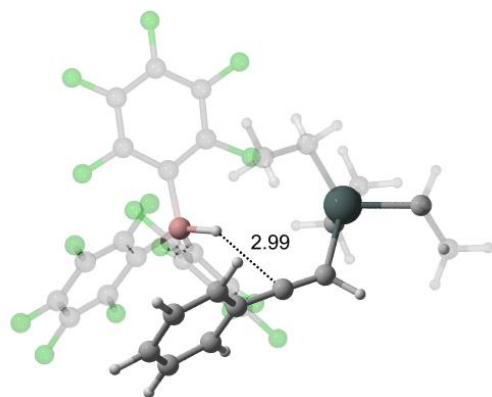

**3'**

|   |             |             |             |    |             |             |             |
|---|-------------|-------------|-------------|----|-------------|-------------|-------------|
| C | -3.66283400 | -2.60109600 | 0.95854400  | Sn | 1.65010100  | -0.12515100 | -3.09523400 |
| F | -4.58871000 | -3.56621200 | 1.08014800  | C  | 1.91775000  | -1.29317700 | -4.88513600 |
| F | -1.92056800 | -4.20993400 | 1.01211700  | H  | 2.87864200  | -1.81763900 | -4.82029100 |
| F | -0.06860800 | -2.30240300 | 0.77857700  | H  | 1.13718300  | -2.06276200 | -4.90912800 |
| F | -3.50448400 | 0.99558400  | 0.69217900  | C  | -0.06327200 | 1.16004900  | -3.16922500 |
| F | -5.34588700 | -0.94027300 | 0.91217400  | H  | -0.76195800 | 0.72731100  | -3.89429700 |
| F | -1.40781400 | 3.51457000  | 0.95040900  | H  | -0.55263300 | 1.11894900  | -2.19512400 |
| F | -2.12471100 | 5.23935300  | -0.94912900 | C  | 3.48793200  | 0.72615500  | -2.38932800 |
| F | -2.26174100 | 4.46351000  | -3.57204000 | H  | 3.27505700  | 1.28880700  | -1.47613400 |
| F | -1.65355100 | 1.86517300  | -4.24166800 | H  | 4.16059300  | -0.09463300 | -2.11251900 |
| F | -0.94058200 | 0.11668600  | -2.35128400 | C  | 1.85231200  | -0.42080500 | -6.15180400 |
| F | -1.53656700 | 0.19319200  | 3.34953400  | H  | 2.64746400  | 0.33430700  | -6.17148700 |
| F | -0.54338700 | 1.42449700  | 5.49079700  | H  | 1.96250200  | -1.03134000 | -7.05698300 |
| F | 1.52959400  | 3.19893300  | 5.25241100  | H  | 0.89427400  | 0.10687000  | -6.23244900 |
| F | 2.59927500  | 3.69941900  | 2.78201300  | C  | 0.30852800  | 2.60351100  | -3.54538400 |
| F | 1.63528800  | 2.46156800  | 0.61039300  | H  | -0.58489900 | 3.24018000  | -3.53888500 |
| H | 0.40786800  | 0.05740500  | -0.05056100 | H  | 1.02099400  | 3.04083500  | -2.83803700 |

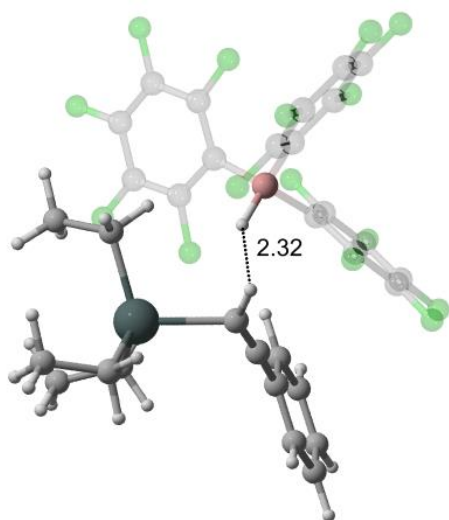

**3''**

|   |            |             |             |   |             |             |             |
|---|------------|-------------|-------------|---|-------------|-------------|-------------|
| C | 5.12593000 | -2.97681800 | 0.90576300  | C | 0.00101500  | -1.84787500 | 1.87466000  |
| C | 4.09220400 | -2.95230900 | -0.02006400 | C | 0.24274900  | 0.24350000  | 2.90651900  |
| C | 3.09995000 | -1.94508000 | 0.06937800  | C | 0.74383800  | -2.46662500 | 2.87441900  |
| C | 3.16832000 | -0.96219900 | 1.08835400  | C | 0.99749700  | -0.33043400 | 3.93053800  |
| C | 4.21431300 | -0.99642000 | 2.00037600  | C | 1.25784200  | -1.69608200 | 3.91204500  |
| C | 5.18460100 | -2.00240300 | 1.91303100  | C | -0.96528300 | 1.75327800  | 0.38324600  |
| H | 5.88379000 | -3.75211600 | 0.85437500  | C | -2.02277000 | 2.66262100  | 0.43114700  |
| H | 4.02121600 | -3.70187000 | -0.80171700 | C | 0.26885300  | 2.33986800  | 0.10512400  |
| H | 2.39824000 | -0.20278300 | 1.14316900  | C | -1.87127500 | 4.03525000  | 0.22218200  |
| H | 4.26702800 | -0.25177400 | 2.78825500  | C | 0.47635900  | 3.69461300  | -0.10908300 |
| H | 5.99197900 | -2.03194700 | 2.63919700  | C | -0.61266900 | 4.55889900  | -0.05154800 |
| C | 2.01692400 | -1.93655300 | -0.81531700 | F | -0.44936700 | 5.87448600  | -0.26740600 |
| C | 1.07394200 | -1.79200100 | -1.61843800 | F | 1.70599900  | 4.17193800  | -0.39620500 |

|   |             |             |             |   |              |             |              |
|---|-------------|-------------|-------------|---|--------------|-------------|--------------|
| F | 1.38277700  | 1.54787800  | 0.01442700  | C | -11.74504400 | -1.73038900 | -7.06990400  |
| F | -3.28293500 | 2.24794600  | 0.68653600  | H | -12.21569500 | -1.95220600 | -8.03536500  |
| F | -2.93292900 | 4.85786200  | 0.27615800  | H | -12.53852900 | -1.74562200 | -6.31493500  |
| F | -0.45147200 | -2.66133600 | 0.88360800  | C | -8.60027800  | -2.71707700 | -5.61108900  |
| F | 1.00473700  | -3.78779900 | 2.82841800  | H | -8.88275500  | -1.98182900 | -4.84862100  |
| F | 2.00815900  | -2.26129600 | 4.87397800  | H | -8.18203000  | -3.57754700 | -5.07528400  |
| F | 1.49201800  | 0.42499300  | 4.92939600  | C | -9.65321800  | -4.09021100 | -9.49017900  |
| F | 0.03328000  | 1.57610600  | 3.01131800  | H | -8.70212800  | -3.55511800 | -9.38186700  |
| F | -3.10200600 | 0.01824500  | 2.62541300  | H | -9.51987900  | -4.83054600 | -10.28910300 |
| F | -5.52295500 | -1.15531600 | 2.42121100  | H | -10.39977800 | -3.36706200 | -9.84048800  |
| F | -6.28793800 | -2.33543800 | 0.07331600  | C | -11.05582600 | -0.35684700 | -7.09228900  |
| F | -4.57665500 | -2.33576800 | -2.06732600 | H | -11.78180100 | 0.43724200  | -7.30576500  |
| F | -2.16088500 | -1.19213200 | -1.88298500 | H | -10.59851300 | -0.12038900 | -6.12601900  |
| H | -0.40522000 | -0.27771000 | -0.42551700 | H | -10.27483000 | -0.30120100 | -7.86041300  |

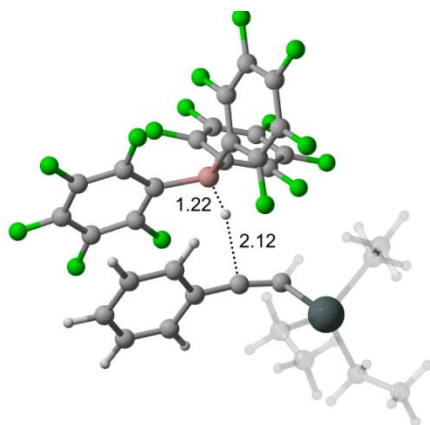

### TS2

|    |              |             |             |   |              |             |             |
|----|--------------|-------------|-------------|---|--------------|-------------|-------------|
| C  | -8.58086400  | -6.21556600 | -1.65886600 | C | -7.55426500  | -2.12636200 | -6.57207300 |
| C  | -9.49402100  | -6.02468000 | -2.68519200 | H | -7.23973400  | -2.85475800 | -7.32925400 |
| C  | -10.01422200 | -4.72807200 | -2.92874000 | H | -7.93652500  | -1.24453200 | -7.09937100 |
| C  | -9.60816100  | -3.63636100 | -2.11966600 | H | -6.65334000  | -1.81334400 | -6.02965000 |
| C  | -8.67425100  | -3.83995900 | -1.11446600 | H | -12.67545400 | -4.39266300 | -5.16337100 |
| C  | -8.17263100  | -5.12557400 | -0.87631200 | B | -13.12703100 | -3.37213200 | -1.73110200 |
| H  | -8.19756400  | -7.20884900 | -1.44965600 | C | -14.58599000 | -4.08334000 | -1.88017300 |
| H  | -9.83782100  | -6.85586200 | -3.29179600 | C | -15.18764200 | -4.16069100 | -3.13513300 |
| H  | -10.03884900 | -2.65994800 | -2.30054600 | C | -15.34040900 | -4.63216000 | -0.84313500 |
| H  | -8.35986600  | -3.00852300 | -0.49202000 | C | -16.43018900 | -4.73632700 | -3.37463900 |
| H  | -7.46728300  | -5.28356300 | -0.06543900 | C | -16.58968900 | -5.22204800 | -1.02957300 |
| C  | -10.95474100 | -4.54392000 | -3.94419300 | C | -17.14034700 | -5.27632300 | -2.30617500 |
| C  | -11.59979000 | -4.39615100 | -5.01926800 | C | -12.26093300 | -3.86222000 | -0.44979100 |
| Sn | -10.40351000 | -3.34404400 | -6.59251800 | C | -11.94975200 | -5.22283500 | -0.33836900 |
| C  | -10.08506600 | -4.76590100 | -8.17666400 | C | -11.66531600 | -3.05699700 | 0.52285100  |
| H  | -9.33075100  | -5.48910100 | -7.84421800 | C | -11.12741600 | -5.75874800 | 0.64268100  |
| H  | -11.01676500 | -5.32596300 | -8.31963100 | C | -10.83296000 | -3.54876400 | 1.52752700  |
|    |              |             |             | C | -10.55589900 | -4.90951200 | 1.58634400  |
|    |              |             |             | C | -13.28505200 | -1.75881700 | -1.91630300 |
|    |              |             |             | C | -14.21565500 | -1.01959200 | -1.18104500 |
|    |              |             |             | C | -12.56972600 | -1.01074100 | -2.84628900 |
|    |              |             |             | C | -14.43307700 | 0.34435000  | -1.35061700 |
|    |              |             |             | C | -12.74687300 | 0.35447400  | -3.05584000 |
|    |              |             |             | C | -13.69091100 | 1.04095700  | -2.30189100 |
|    |              |             |             | F | -13.88209500 | 2.35696800  | -2.48590700 |
|    |              |             |             | F | -12.01480300 | 1.01079700  | -3.98054600 |
|    |              |             |             | F | -11.60884300 | -1.59806900 | -3.62481700 |
|    |              |             |             | F | -14.94951900 | -1.63472800 | -0.22863800 |
|    |              |             |             | F | -15.34289000 | 0.99868500  | -0.60937000 |
|    |              |             |             | F | -12.44706800 | -6.09563400 | -1.24945200 |

|   |              |             |             |   |              |             |             |
|---|--------------|-------------|-------------|---|--------------|-------------|-------------|
| F | -10.84551900 | -7.07552200 | 0.67224400  | H | -13.33210000 | -3.03208300 | -6.97010500 |
| F | -9.73158500  | -5.39835000 | 2.52881600  | C | -8.80211500  | -1.88607300 | -8.09603600 |
| F | -10.26668900 | -2.71655200 | 2.42142900  | H | -8.00503900  | -2.53481400 | -7.71261000 |
| F | -11.84999200 | -1.71583900 | 0.52163100  | H | -8.34155400  | -1.17948500 | -8.79798700 |
| F | -14.87620600 | -4.60998200 | 0.42666600  | H | -9.19559100  | -1.30527900 | -7.25573300 |
| F | -17.26920200 | -5.73919400 | 0.00885000  | C | -11.02603700 | -7.17965700 | -7.05167800 |
| F | -18.34115800 | -5.84305600 | -2.50686000 | H | -10.74994100 | -8.20975600 | -7.31060400 |
| F | -16.94668800 | -4.78223600 | -4.61827600 | H | -10.69314800 | -7.00340900 | -6.02073400 |
| F | -14.54579600 | -3.64410900 | -4.22647600 | H | -12.12135600 | -7.12813700 | -7.04707900 |
| H | -12.47682900 | -3.78713600 | -2.67442000 | C | -13.67136600 | -4.19348300 | -8.78146800 |

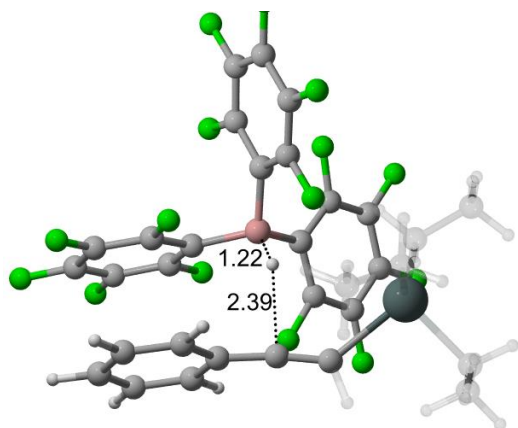

TS2'

|    |              |             |             |   |              |             |             |
|----|--------------|-------------|-------------|---|--------------|-------------|-------------|
| C  | -8.20031900  | -0.66059700 | -2.52002300 | C | -14.35954500 | 0.24074300  | -4.84525300 |
| C  | -8.58923200  | -1.35832600 | -3.65127500 | C | -12.76056100 | -0.34039300 | -6.45515500 |
| C  | -9.36709500  | -2.54057400 | -3.51607500 | C | -14.77459700 | 1.32560900  | -5.61022700 |
| C  | -9.75956900  | -2.98854900 | -2.22498700 | C | -13.14062400 | 0.72798400  | -7.26335100 |
| C  | -9.34165300  | -2.28819700 | -1.10366100 | C | -14.16140000 | 1.56970500  | -6.83756800 |
| C  | -8.57165200  | -1.12769900 | -1.25005900 | C | -13.82938000 | -3.17559200 | -4.28748300 |
| H  | -7.62502000  | 0.25419100  | -2.61521400 | C | -15.13008200 | -3.24203900 | -4.79357100 |
| H  | -8.32107400  | -1.01368600 | -4.64411700 | C | -13.33333000 | -4.41131300 | -3.86757700 |
| H  | -10.36753200 | -3.87833500 | -2.13507000 | C | -15.86977100 | -4.42193300 | -4.88660400 |
| H  | -9.63130600  | -2.62816900 | -0.11477300 | C | -14.02388500 | -5.61430400 | -3.94070700 |
| H  | -8.26978600  | -0.57055900 | -0.36781100 | C | -15.31455000 | -5.62230300 | -4.46048700 |
| C  | -9.62999900  | -3.30742200 | -4.64324400 | F | -16.00648600 | -6.76902500 | -4.55146600 |
| C  | -9.68707100  | -4.05846100 | -5.66126600 | F | -13.45787800 | -6.76398800 | -3.52440400 |
| Sn | -10.92060400 | -4.12994800 | -7.53660200 | F | -12.07816400 | -4.49012300 | -3.34773700 |
| C  | -9.91455500  | -2.68936500 | -8.78562300 | F | -15.75345000 | -2.14155400 | -5.27129700 |
| H  | -9.51130200  | -3.24750200 | -9.64017100 | F | -17.11137400 | -4.41116000 | -5.40288400 |
| H  | -10.68195000 | -2.01148500 | -9.17372600 | F | -14.99050900 | 0.05377800  | -3.66387200 |
| C  | -10.41701800 | -6.16551300 | -8.03415800 | F | -15.75970600 | 2.13648800  | -5.18717400 |
| H  | -10.76969000 | -6.36473400 | -9.05460500 | F | -14.54811100 | 2.60751700  | -7.59656000 |
| H  | -9.32330500  | -6.26101800 | -8.06617500 | F | -12.52456400 | 0.95549500  | -8.44106600 |
| C  | -13.04872800 | -3.99598400 | -7.38862400 | F | -11.72249000 | -1.09145300 | -6.92710100 |
| H  | -13.39679500 | -4.76859200 | -6.69782400 | F | -13.79483100 | -2.75723800 | -1.48783500 |



|   |              |             |             |
|---|--------------|-------------|-------------|
| F | -13.06618900 | -1.61504000 | 0.80795700  |
| F | -11.38665600 | 0.54795500  | 0.82387800  |
| F | -10.43705900 | 1.53764400  | -1.54530000 |
| F | -11.09223100 | 0.37049600  | -3.86327700 |
| H | -11.77909500 | -2.25822900 | -4.73578400 |

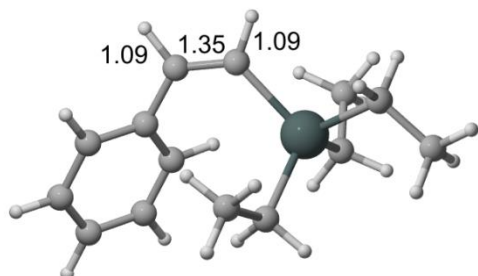

**P1**

|    |             |             |             |
|----|-------------|-------------|-------------|
| C  | -0.00767200 | 1.10035400  | 0.07228200  |
| H  | -1.07334600 | 1.29944500  | 0.21777500  |
| C  | 0.82848100  | 2.12086900  | -0.19868600 |
| C  | 0.38779500  | -0.31280400 | 0.24111100  |
| C  | -0.15804000 | -1.08040500 | 1.28471500  |
| C  | 1.31453600  | -0.92302300 | -0.62040600 |
| C  | 0.24949300  | -2.39819400 | 1.49254000  |
| H  | -0.88961300 | -0.62765400 | 1.95000000  |
| C  | 1.71957300  | -2.24333600 | -0.41885100 |
| H  | 1.69341300  | -0.36608700 | -1.47141200 |
| C  | 1.19644900  | -2.98316500 | 0.64499700  |
| H  | -0.17076600 | -2.96989500 | 2.31577700  |
| H  | 2.43530900  | -2.69738300 | -1.09930600 |
| H  | 1.51138400  | -4.01082500 | 0.80412200  |
| Sn | 2.97481800  | 2.08586500  | -0.21215300 |
| C  | 3.57427600  | 4.12983200  | 0.15325500  |
| C  | 5.09713200  | 4.30913100  | 0.26077000  |
| H  | 3.08553300  | 4.47097200  | 1.07544500  |
| H  | 3.17399800  | 4.75718400  | -0.65458300 |
| H  | 5.37569800  | 5.35577200  | 0.44449600  |
| H  | 5.51581400  | 3.71369100  | 1.08216900  |
| H  | 5.60704600  | 3.99600400  | -0.65950700 |
| C  | 3.75990900  | 1.47428700  | -2.13350800 |
| C  | 2.88809500  | 1.91571300  | -3.31966600 |
| H  | 3.88053400  | 0.38335400  | -2.12961300 |
| H  | 4.77070900  | 1.89234500  | -2.22982400 |
| H  | 3.30794400  | 1.58758600  | -4.28031500 |
| H  | 1.87207100  | 1.50802100  | -3.24741600 |
| H  | 2.79216200  | 3.00821500  | -3.36351900 |
| C  | 3.70218100  | 0.82546600  | 1.38079600  |

|   |            |             |             |
|---|------------|-------------|-------------|
| C | 2.96262900 | 1.04205500  | 2.71002000  |
| H | 4.77519400 | 1.02592100  | 1.50235500  |
| H | 3.61062500 | -0.21873800 | 1.06206200  |
| H | 3.35798100 | 0.39203300  | 3.50247600  |
| H | 3.05435900 | 2.07785000  | 3.06193100  |
| H | 1.89398400 | 0.82228600  | 2.60903200  |
| H | 0.36242400 | 3.10425600  | -0.29601500 |

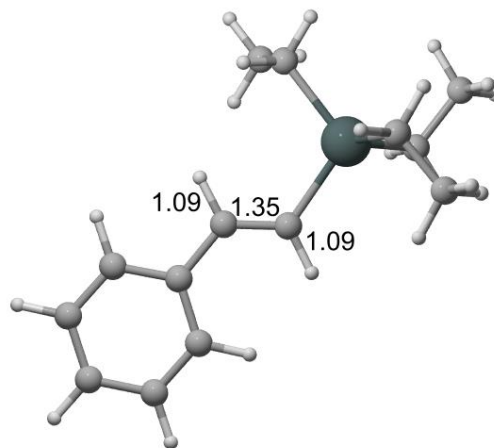

**P2**

|    |             |             |             |
|----|-------------|-------------|-------------|
| C  | 0.12840000  | 0.95553600  | -0.36377400 |
| H  | -0.88085500 | 1.00722100  | -0.77865600 |
| C  | 0.87009900  | 2.08013200  | -0.31590100 |
| C  | 0.50288200  | -0.39847900 | 0.08458300  |
| C  | -0.42501700 | -1.44395900 | -0.06772400 |
| C  | 1.75035800  | -0.70086900 | 0.66169100  |
| C  | -0.12361000 | -2.74502900 | 0.33845100  |
| H  | -1.39466100 | -1.22860900 | -0.51155800 |
| C  | 2.05433200  | -1.99785300 | 1.06818700  |
| H  | 2.48776400  | 0.08529200  | 0.79369600  |
| C  | 1.11926800  | -3.02804500 | 0.90897500  |
| H  | -0.85824900 | -3.53550400 | 0.20939500  |
| H  | 3.02391800  | -2.20898900 | 1.51178800  |
| H  | 1.35949600  | -4.03879100 | 1.22726200  |
| Sn | 0.16272400  | 3.96690600  | -1.01505800 |
| C  | 1.57597200  | 4.80671000  | -2.41585900 |
| C  | 1.15600200  | 6.19405600  | -2.92788900 |
| H  | 1.68888300  | 4.10650200  | -3.25320600 |
| H  | 2.55797900  | 4.86164900  | -1.92815600 |
| H  | 1.88471200  | 6.60642800  | -3.63893800 |
| H  | 0.18674600  | 6.15808400  | -3.44203200 |
| H  | 1.06050900  | 6.91565200  | -2.10641500 |
| C  | -0.02179500 | 5.33275200  | 0.64886600  |
| C  | 1.32274100  | 5.62157300  | 1.33604700  |

|   |             |            |             |
|---|-------------|------------|-------------|
| H | -0.73409000 | 4.90759700 | 1.36724400  |
| H | -0.47039700 | 6.26565500 | 0.28265700  |
| H | 1.21068000  | 6.31984800 | 2.17665500  |
| H | 1.77536600  | 4.70461700 | 1.73438500  |
| H | 2.04498200  | 6.06610500 | 0.63938000  |
| C | -1.72494300 | 3.63429600 | -2.00740900 |
| C | -1.57959300 | 2.91269700 | -3.35768900 |
| H | -2.21574400 | 4.60624600 | -2.14698200 |
| H | -2.37597500 | 3.06053600 | -1.33472500 |
| H | -2.55318100 | 2.74958500 | -3.83963800 |
| H | -0.96311100 | 3.49065200 | -4.05746300 |
| H | -1.10290000 | 1.93134800 | -3.24300800 |
| H | 1.87871000  | 2.01298000 | 0.09771500  |

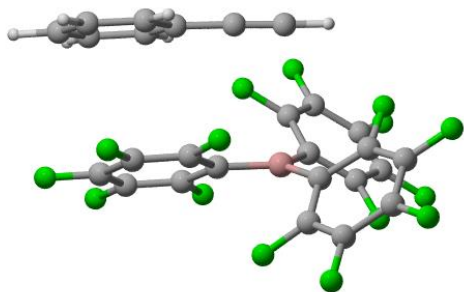

**4**

|   |              |             |             |
|---|--------------|-------------|-------------|
| C | -6.46109500  | -7.57880700 | -4.95325600 |
| C | -7.15488100  | -6.93397600 | -5.97506300 |
| C | -7.71947100  | -5.66235000 | -5.75560600 |
| C | -7.55905300  | -5.04507800 | -4.49959600 |
| C | -6.86901100  | -5.70087300 | -3.48197900 |
| C | -6.32262900  | -6.96933400 | -3.70254900 |
| H | -6.04244400  | -8.56546300 | -5.12780900 |
| H | -7.28400300  | -7.41093300 | -6.94134300 |
| H | -7.98275300  | -4.06234900 | -4.33205100 |
| H | -6.75912600  | -5.22199500 | -2.51291800 |
| H | -5.79389700  | -7.48075600 | -2.90338400 |
| C | -8.46563500  | -5.02488500 | -6.79292800 |
| C | -9.11883800  | -4.50601700 | -7.67222800 |
| H | -9.67741400  | -4.03919700 | -8.45208600 |
| B | -11.97410100 | -5.22209300 | -5.86815500 |
| C | -12.61778200 | -5.96853900 | -7.09266500 |
| C | -13.25476300 | -7.20908100 | -6.95878600 |
| C | -12.62415400 | -5.43002500 | -8.38484900 |
| C | -13.84667600 | -7.87977300 | -8.02248400 |
| C | -13.18349200 | -6.07862600 | -9.47909700 |
| C | -13.80230900 | -7.31319700 | -9.29476900 |

|   |              |             |              |
|---|--------------|-------------|--------------|
| C | -12.24898000 | -3.68522800 | -5.71625600  |
| C | -11.30119600 | -2.77670300 | -5.22273800  |
| C | -13.47565600 | -3.11643200 | -6.09559000  |
| C | -11.52787400 | -1.40841600 | -5.13727000  |
| C | -13.74785500 | -1.75628800 | -6.00417100  |
| C | -12.76192100 | -0.89432400 | -5.52938500  |
| C | -11.16560900 | -6.03244900 | -4.80655900  |
| C | -10.47762300 | -7.21630100 | -5.12820900  |
| C | -11.10723700 | -5.66537700 | -3.45122000  |
| C | -9.79759000  | -7.98400800 | -4.19226400  |
| C | -10.41990900 | -6.39784900 | -2.49173100  |
| C | -9.75785700  | -7.56441600 | -2.86592500  |
| F | -9.09944600  | -8.28167700 | -1.95423200  |
| F | -10.38951100 | -5.99665300 | -1.21300900  |
| F | -11.76543300 | -4.57691600 | -3.00988300  |
| F | -10.43823200 | -7.65905100 | -6.39679800  |
| F | -9.18180600  | -9.11718200 | -4.55173700  |
| F | -10.09877500 | -3.20877600 | -4.80954900  |
| F | -10.57908600 | -0.58438400 | -4.67304600  |
| F | -13.00134600 | 0.41513700  | -5.44165100  |
| F | -14.94175100 | -1.26905500 | -6.36650400  |
| F | -14.47740100 | -3.89606600 | -6.54815000  |
| F | -12.05995500 | -4.22565300 | -8.62254800  |
| F | -13.14212500 | -5.52723300 | -10.69963400 |
| F | -14.35619700 | -7.94679900 | -10.33081100 |
| F | -14.45283700 | -9.05992500 | -7.83911300  |
| F | -13.33900200 | -7.79741400 | -5.74902300  |

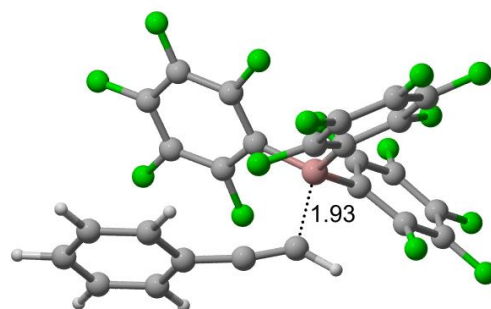

**TS3**

|   |             |             |             |
|---|-------------|-------------|-------------|
| C | -6.10419000 | -7.39399400 | -5.21810800 |
| C | -7.05273100 | -6.87240100 | -6.08682100 |
| C | -7.61276500 | -5.59599700 | -5.83143700 |
| C | -7.19178200 | -4.85038300 | -4.70261600 |
| C | -6.25024300 | -5.39170500 | -3.83645600 |
| C | -5.71067200 | -6.65915300 | -4.09170700 |
| H | -5.68374000 | -8.37764700 | -5.40123600 |

|   |              |             |              |
|---|--------------|-------------|--------------|
| H | -7.39544500  | -7.43728000 | -6.94631900  |
| H | -7.63000000  | -3.87736100 | -4.51743600  |
| H | -5.93762400  | -4.83372500 | -2.95929200  |
| H | -4.98067100  | -7.07945900 | -3.40567700  |
| C | -8.63069600  | -5.10336600 | -6.65669000  |
| C | -9.67106500  | -4.74799800 | -7.24303200  |
| H | -9.93643100  | -4.22396400 | -8.14545200  |
| B | -11.28116300 | -5.11813000 | -6.24744300  |
| C | -12.15117900 | -5.93067200 | -7.34650000  |
| C | -12.84659800 | -7.11399400 | -7.06452900  |
| C | -12.32126500 | -5.47512800 | -8.66086300  |
| C | -13.60265400 | -7.81031600 | -8.00512200  |
| C | -13.05652600 | -6.13961100 | -9.63419500  |
| C | -13.70222500 | -7.32743900 | -9.30489100  |
| C | -11.77051900 | -3.59757300 | -5.97591700  |
| C | -10.95109200 | -2.64450900 | -5.35794800  |
| C | -13.04123800 | -3.11904100 | -6.31982900  |
| C | -11.31999200 | -1.32524300 | -5.12952200  |
| C | -13.45714000 | -1.80608200 | -6.10240700  |
| C | -12.58828100 | -0.89688300 | -5.51067900  |
| C | -10.83800200 | -5.97174200 | -4.94433400  |
| C | -10.18133100 | -7.20097000 | -5.08159100  |
| C | -11.02716700 | -5.57126100 | -3.61887900  |
| C | -9.69711100  | -7.95277900 | -4.02051900  |
| C | -10.56054000 | -6.29568600 | -2.52055300  |
| C | -9.87990500  | -7.48985000 | -2.72064400  |
| F | -9.41084900  | -8.19038500 | -1.67935200  |
| F | -10.76207300 | -5.84415800 | -1.27246700  |
| F | -11.70361900 | -4.44214800 | -3.31749500  |
| F | -9.97907200  | -7.71864200 | -6.31756800  |
| F | -9.04843100  | -9.11019300 | -4.23622300  |
| F | -9.72423900  | -2.99639300 | -4.90311700  |
| F | -10.47435200 | -0.47021800 | -4.53158900  |
| F | -12.96871900 | 0.36798300  | -5.29765100  |
| F | -14.69031000 | -1.41535400 | -6.45721900  |
| F | -13.96992200 | -3.93273700 | -6.86659300  |
| F | -11.78158200 | -4.28920200 | -9.04836300  |
| F | -13.16440100 | -5.63881100 | -10.87462200 |
| F | -14.42074000 | -7.98531800 | -10.22163800 |
| F | -14.23955500 | -8.94070000 | -7.66426500  |
| F | -12.85234400 | -7.64005300 | -5.82097500  |

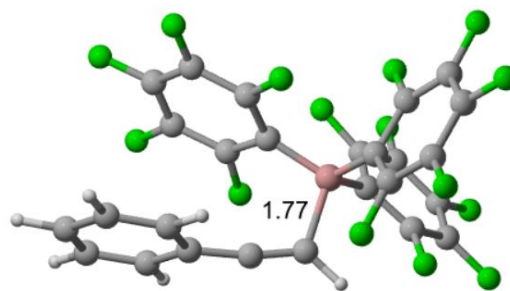

5

|   |             |             |             |
|---|-------------|-------------|-------------|
| C | 4.07246300  | -0.85752800 | 2.54799500  |
| C | 3.19427500  | -0.56647800 | 1.51466500  |
| C | 2.28992900  | 0.51853200  | 1.64920000  |
| C | 2.28677500  | 1.30230000  | 2.83213300  |
| C | 3.16195200  | 0.98908800  | 3.86289300  |
| C | 4.04996500  | -0.08615700 | 3.71911900  |
| H | 4.75872800  | -1.69351200 | 2.45981300  |
| H | 3.16520600  | -1.16918900 | 0.61323600  |
| H | 1.58012000  | 2.12126700  | 2.91933100  |
| H | 3.15342200  | 1.56932800  | 4.78005200  |
| H | 4.72743900  | -0.33106800 | 4.53229400  |
| C | 1.33186400  | 0.76166800  | 0.66877400  |
| C | 0.33279000  | 0.88464600  | -0.08375600 |
| H | 0.20767800  | 1.43956200  | -1.00368700 |
| B | -1.13331900 | 0.07972300  | 0.50744300  |
| C | -1.68436700 | -0.77293800 | -0.77197700 |
| C | -2.13179800 | -2.09926900 | -0.72256500 |
| C | -1.86075700 | -0.15924600 | -2.01814700 |
| C | -2.66305800 | -2.77457800 | -1.81897600 |
| C | -2.38041000 | -0.79487800 | -3.14093600 |
| C | -2.78244700 | -2.12263200 | -3.04196800 |
| C | -2.22378000 | 1.25059500  | 0.83460300  |
| C | -2.02977000 | 2.63033600  | 0.84015800  |
| C | -3.53117400 | 0.84877000  | 1.13014700  |
| C | -3.04265400 | 3.55103500  | 1.10546500  |
| C | -4.57236700 | 1.72826000  | 1.40179900  |
| C | -4.32598800 | 3.09871000  | 1.38725000  |
| C | -0.66713400 | -0.79344400 | 1.80723100  |
| C | 0.19364100  | -1.88695200 | 1.65863100  |
| C | -0.92249600 | -0.44620300 | 3.13558700  |
| C | 0.74905300  | -2.59557200 | 2.71524900  |
| C | -0.38684500 | -1.12893800 | 4.22957100  |
| C | 0.45761400  | -2.21114600 | 4.02060200  |
| F | 1.00335400  | -2.86187000 | 5.05801300  |
| F | -0.65931900 | -0.72836000 | 5.48248400  |

|   |             |             |             |   |             |             |             |
|---|-------------|-------------|-------------|---|-------------|-------------|-------------|
| F | -1.69138100 | 0.62102800  | 3.44886900  | C | -3.32921800 | -0.39469400 | -0.21095500 |
| F | 0.58864600  | -2.26830000 | 0.41940000  | C | -4.48186000 | -2.77362500 | 0.51382100  |
| F | 1.60059100  | -3.61193400 | 2.49121200  | C | -4.04125800 | -1.11754200 | -1.15973700 |
| F | -0.80708100 | 3.16705200  | 0.59008400  | C | -4.62228300 | -2.32799900 | -0.79511600 |
| F | -2.78566000 | 4.86998500  | 1.09163600  | C | -2.87469700 | 1.54041000  | 2.51143800  |
| F | -5.31208900 | 3.96857900  | 1.64430500  | C | -2.12827100 | 2.50736000  | 3.19609700  |
| F | -5.80258700 | 1.27263900  | 1.68558400  | C | -4.15771100 | 1.96521000  | 2.14827500  |
| F | -3.82183100 | -0.47064300 | 1.19436700  | C | -2.57513100 | 3.79241300  | 3.47358600  |
| F | -1.52957900 | 1.14902000  | -2.18626000 | C | -4.65158500 | 3.24288900  | 2.41144500  |
| F | -2.50516800 | -0.13917800 | -4.30611700 | C | -3.85309800 | 4.16926100  | 3.07153900  |
| F | -3.28980400 | -2.75903600 | -4.10476500 | C | -1.76510500 | -0.78462200 | 3.47483800  |
| F | -3.07233100 | -4.04718800 | -1.70241500 | C | -0.97380900 | -1.92639700 | 3.31278300  |
| F | -2.10402600 | -2.80064500 | 0.42843700  | C | -2.06045200 | -0.48032800 | 4.80502000  |
|   |             |             |             | C | -0.45688900 | -2.67718100 | 4.35979000  |
|   |             |             |             | C | -1.57064300 | -1.20901300 | 5.89017700  |
|   |             |             |             | C | -0.75186300 | -2.30961700 | 5.66919100  |
|   |             |             |             | F | -0.25874500 | -3.01206300 | 6.69896400  |
|   |             |             |             | F | -1.88107100 | -0.85168300 | 7.14652700  |
|   |             |             |             | F | -2.87323600 | 0.55113500  | 5.12203000  |
|   |             |             |             | F | -0.67780900 | -2.36859300 | 2.06226700  |
|   |             |             |             | F | 0.32739200  | -3.74448200 | 4.12041300  |
|   |             |             |             | F | -0.89538900 | 2.20017700  | 3.67235000  |
|   |             |             |             | F | -1.79396900 | 4.66386100  | 4.13477300  |
|   |             |             |             | F | -4.30961700 | 5.40136800  | 3.32879200  |
|   |             |             |             | F | -5.89330500 | 3.58394300  | 2.03355200  |
|   |             |             |             | F | -5.02353500 | 1.13173100  | 1.53168300  |
|   |             |             |             | F | -2.85168100 | 0.80731300  | -0.63435800 |
|   |             |             |             | F | -4.18735100 | -0.65253900 | -2.41104200 |
|   |             |             |             | F | -5.31725000 | -3.04386100 | -1.68772000 |
|   |             |             |             | F | -5.05439000 | -3.92807600 | 0.88892000  |
|   |             |             |             | F | -3.71085700 | -2.51841600 | 2.68273400  |
|   |             |             |             | C | 4.36586900  | 1.26334900  | 0.34935300  |
|   |             |             |             | H | 4.04623300  | 0.48348000  | 1.04926900  |
|   |             |             |             | H | 5.16154600  | 0.81847900  | -0.26288400 |
|   |             |             |             | C | 4.90496300  | 2.48075300  | 1.11689200  |
|   |             |             |             | H | 5.72681900  | 2.20438600  | 1.79164300  |
|   |             |             |             | H | 5.28814600  | 3.25043000  | 0.43585600  |
|   |             |             |             | H | 4.12536800  | 2.94814400  | 1.73100800  |
|   |             |             |             | C | 2.04926900  | -0.00876100 | -2.03607000 |
|   |             |             |             | H | 2.80272500  | -0.20303900 | -2.81115400 |
|   |             |             |             | H | 1.12536700  | 0.24838200  | -2.56963200 |
|   |             |             |             | C | 3.24972900  | 3.29801400  | -2.33750700 |
|   |             |             |             | H | 3.57418500  | 4.17459300  | -1.76251200 |
|   |             |             |             | H | 4.12827900  | 2.95794100  | -2.90184900 |
| C | 3.26953600  | -1.26898600 | 3.28053300  | F | -4.18735100 | -0.65253900 | -2.41104200 |
| C | 2.12931600  | -1.06171200 | 2.51789900  | F | -5.31725000 | -3.04386100 | -1.68772000 |
| C | 1.49217700  | 0.20633700  | 2.53893700  | F | -5.05439000 | -3.92807600 | 0.88892000  |
| C | 2.03039900  | 1.25847900  | 3.32293800  | F | -3.71085700 | -2.51841600 | 2.68273400  |
| C | 3.17932700  | 1.03829300  | 4.06898900  | C | 4.36586900  | 1.26334900  | 0.34935300  |
| C | 3.79295300  | -0.22160500 | 4.05124900  | H | 4.04623300  | 0.48348000  | 1.04926900  |
| H | 3.75287600  | -2.24077700 | 3.28011300  | H | 5.16154600  | 0.81847900  | -0.26288400 |
| H | 1.70640600  | -1.85577000 | 1.91473700  | C | 4.90496300  | 2.48075300  | 1.11689200  |
| H | 1.53034000  | 2.21976000  | 3.32675300  | H | 5.72681900  | 2.20438600  | 1.79164300  |
| H | 3.59953700  | 1.83961400  | 4.66829700  | H | 5.28814600  | 3.25043000  | 0.43585600  |
| H | 4.68836700  | -0.38890000 | 4.64335200  | H | 4.12536800  | 2.94814400  | 1.73100800  |
| C | 0.33158200  | 0.41363600  | 1.79728300  | C | 2.04926900  | -0.00876100 | -2.03607000 |
| C | -0.79214500 | 0.52401400  | 1.24776000  | H | 2.80272500  | -0.20303900 | -2.81115400 |
| H | -1.02697900 | 0.91377300  | 0.26697100  | H | 1.12536700  | 0.24838200  | -2.56963200 |
| B | -2.25395200 | 0.07199800  | 2.17660300  | C | 3.24972900  | 3.29801400  | -2.33750700 |
| C | -3.12317700 | -0.80634700 | 1.11175100  | H | 3.57418500  | 4.17459300  | -1.76251200 |
| C | -3.75159700 | -2.01667600 | 1.42858100  | H | 4.12827900  | 2.95794100  | -2.90184900 |

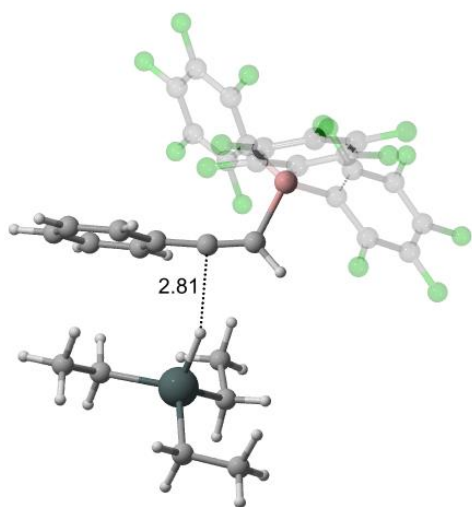

**6**

|    |            |             |             |
|----|------------|-------------|-------------|
| C  | 1.83575400 | -1.26895400 | -1.18270700 |
| H  | 1.03245800 | -1.12936600 | -0.45085300 |
| H  | 1.56052900 | -2.13313200 | -1.80162300 |
| H  | 2.74316800 | -1.54130300 | -0.62887100 |
| C  | 2.11326800 | 3.68152600  | -3.29961900 |
| H  | 1.79227100 | 2.82692700  | -3.90817700 |
| H  | 1.23155600 | 4.04589000  | -2.75783800 |
| H  | 2.42073000 | 4.47618100  | -3.99228000 |
| Sn | 2.70884300 | 1.73888700  | -0.95035700 |
| H  | 1.41318600 | 2.32347700  | 0.04410500  |

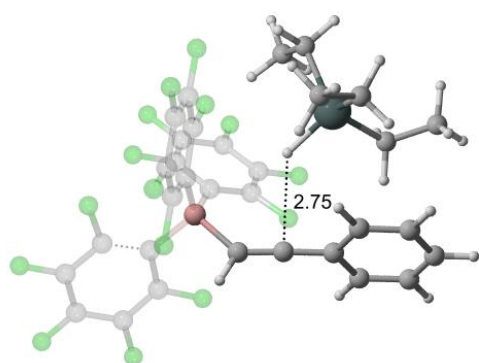

**6'**

|   |             |             |             |
|---|-------------|-------------|-------------|
| C | 4.96243500  | -2.05054800 | 0.24526600  |
| C | 3.72499500  | -1.75847300 | -0.30805200 |
| C | 3.41645400  | -0.42262300 | -0.67364700 |
| C | 4.36988500  | 0.60777600  | -0.46967300 |
| C | 5.60098500  | 0.30079800  | 0.09294200  |
| C | 5.89427000  | -1.02283800 | 0.44835100  |
| H | 5.20439200  | -3.06914200 | 0.53106900  |
| H | 2.98039000  | -2.53185300 | -0.46115600 |
| H | 4.11014900  | 1.62490600  | -0.74144700 |
| H | 6.33188100  | 1.08471900  | 0.26368500  |
| H | 6.85690500  | -1.25569800 | 0.89470200  |
| C | 2.18339900  | -0.12925600 | -1.24692700 |
| C | 1.08570200  | 0.13673400  | -1.81338800 |
| H | 1.04090500  | -0.00087100 | -2.89579000 |
| B | -0.49545000 | 0.52710000  | -1.24391400 |
| C | -1.13375700 | 1.45485200  | -2.43393700 |
| C | -2.36779500 | 1.25693100  | -3.05655400 |
| C | -0.45112700 | 2.60308200  | -2.84351100 |
| C | -2.88380200 | 2.12103100  | -4.02170900 |
| C | -0.92493200 | 3.49148200  | -3.80286100 |
| C | -2.15781100 | 3.24554000  | -4.40034800 |
| C | -0.55511700 | 1.42651000  | 0.11966300  |
| C | 0.49147700  | 1.91725800  | 0.89632900  |

|   |             |             |             |
|---|-------------|-------------|-------------|
| C | -1.82148200 | 1.83972000  | 0.55476200  |
| C | 0.31867600  | 2.72812600  | 2.01689500  |
| C | -2.04576300 | 2.65047000  | 1.66103200  |
| C | -0.95985700 | 3.10179800  | 2.40596300  |
| C | -1.13216800 | -0.97484400 | -1.12359200 |
| C | -1.13093300 | -1.82946200 | -2.23311700 |
| C | -1.62623700 | -1.56417000 | 0.04345100  |
| C | -1.55583200 | -3.15183500 | -2.20985300 |
| C | -2.06408400 | -2.88540500 | 0.11472200  |
| C | -2.02544500 | -3.69129000 | -1.01566300 |
| F | -2.42852700 | -4.96746100 | -0.95733300 |
| F | -2.50290700 | -3.39232000 | 1.28069400  |
| F | -1.71188400 | -0.87616400 | 1.20265500  |
| F | -0.68797900 | -1.37175000 | -3.43322500 |
| F | -1.51359500 | -3.90983400 | -3.31792200 |
| F | 1.78664800  | 1.62462100  | 0.60763700  |
| F | 1.38506800  | 3.13791600  | 2.72890200  |
| F | -1.14641000 | 3.87041500  | 3.48766700  |
| F | -3.29263900 | 2.98829200  | 2.02530300  |
| F | -2.91975400 | 1.41779600  | -0.10905900 |
| F | 0.75147700  | 2.89915500  | -2.28569100 |
| F | -0.21169100 | 4.57545600  | -4.15382000 |
| F | -2.63942300 | 4.08363300  | -5.32883200 |
| F | -4.07627200 | 1.87811200  | -4.58889300 |
| F | -3.14412800 | 0.20006000  | -2.73922600 |
| C | 2.03584000  | -3.68342200 | 2.27046000  |
| H | 3.07372000  | -3.73018700 | 1.91728100  |
| H | 2.02608600  | -4.18764600 | 3.24525500  |
| C | 1.09885100  | -4.41118500 | 1.29157500  |
| H | 1.40304800  | -5.45382700 | 1.12900500  |
| H | 0.06724500  | -4.42976200 | 1.66220600  |
| H | 1.07343800  | -3.92023300 | 0.30953400  |
| C | 3.17661100  | -0.42003300 | 3.17733400  |
| H | 2.79820100  | 0.44685200  | 3.73319000  |
| H | 3.64763700  | -0.01447200 | 2.27582700  |
| C | -0.10143100 | -1.47514500 | 4.02520300  |
| H | -0.92125900 | -2.12652400 | 3.70009200  |
| H | 0.28121700  | -1.89900700 | 4.96355600  |
| C | 4.20681300  | -1.18806300 | 4.01944400  |
| H | 4.61411800  | -2.04848700 | 3.47324000  |
| H | 5.05522300  | -0.55115500 | 4.30530000  |
| H | 3.76789900  | -1.57473300 | 4.94787500  |
| C | -0.61813000 | -0.04673800 | 4.25549400  |
| H | 0.18459500  | 0.63675700  | 4.56030200  |

|    |             |             |            |
|----|-------------|-------------|------------|
| H  | -1.07139000 | 0.35988600  | 3.34655400 |
| H  | -1.38396300 | -0.01828400 | 5.04173900 |
| Sn | 1.47980800  | -1.61231700 | 2.57196500 |
| H  | 0.95646200  | -1.06078900 | 1.02772800 |

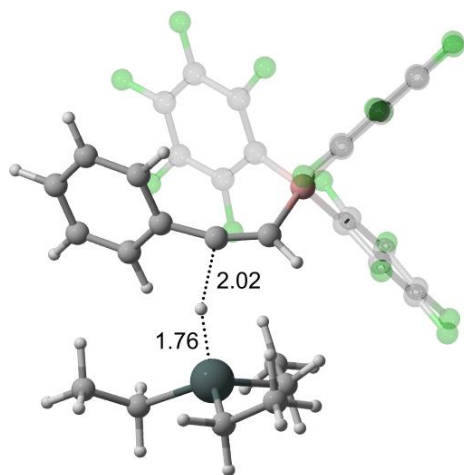

**TS4**

|   |             |             |             |
|---|-------------|-------------|-------------|
| C | 3.22979600  | -1.15569700 | 4.04834500  |
| C | 2.43746800  | -0.77674800 | 2.97577400  |
| C | 1.63143900  | 0.38149400  | 3.07442400  |
| C | 1.64804000  | 1.15963200  | 4.25586000  |
| C | 2.43141300  | 0.75715600  | 5.33194800  |
| C | 3.21969200  | -0.39479700 | 5.22707700  |
| H | 3.83759100  | -2.05250600 | 3.98459100  |
| H | 2.40394700  | -1.37003200 | 2.06912700  |
| H | 1.02133000  | 2.04350200  | 4.31372100  |
| H | 2.42635100  | 1.33275600  | 6.25225900  |
| H | 3.82670500  | -0.70795800 | 6.07169600  |
| C | 0.71363800  | 0.71484500  | 2.06438100  |
| C | -0.39834600 | 0.89654500  | 1.47300100  |
| H | -0.51883900 | 1.41161900  | 0.53109400  |
| B | -1.85605000 | 0.28592900  | 2.14809300  |
| C | -2.48401500 | -0.65606800 | 0.95602500  |
| C | -2.98034000 | -1.95428400 | 1.12098600  |
| C | -2.62287500 | -0.15950800 | -0.34473100 |
| C | -3.50325700 | -2.71927900 | 0.08036300  |
| C | -3.13279900 | -0.88578000 | -1.41538700 |
| C | -3.57169600 | -2.18756200 | -1.20299400 |
| C | -2.87829200 | 1.54317800  | 2.36860300  |
| C | -2.57179000 | 2.89976900  | 2.28743700  |
| C | -4.21840200 | 1.26835100  | 2.65828000  |
| C | -3.50986700 | 3.91569400  | 2.46191200  |
| C | -5.18947100 | 2.24619500  | 2.84153200  |
| C | -4.83181700 | 3.58791000  | 2.73868100  |

|    |             |             |             |
|----|-------------|-------------|-------------|
| C  | -1.44903500 | -0.49067300 | 3.52893500  |
| C  | -0.66893800 | -1.65112100 | 3.49493300  |
| C  | -1.67532200 | 0.00102600  | 4.81648200  |
| C  | -0.16235900 | -2.29149600 | 4.61750500  |
| C  | -1.18591400 | -0.60637000 | 5.97454400  |
| C  | -0.41953600 | -1.75978400 | 5.87702200  |
| F  | 0.08327600  | -2.34174400 | 6.97616600  |
| F  | -1.42397300 | -0.06495000 | 7.18145400  |
| F  | -2.36868500 | 1.14409500  | 5.02173100  |
| F  | -0.31196700 | -2.18873800 | 2.30123100  |
| F  | 0.60760800  | -3.38795700 | 4.49723400  |
| F  | -1.30060900 | 3.31400100  | 2.04184900  |
| F  | -3.14588500 | 5.20655300  | 2.36621100  |
| F  | -5.74947000 | 4.55039600  | 2.90860300  |
| F  | -6.45957200 | 1.91274000  | 3.12279900  |
| F  | -4.61823900 | -0.01536100 | 2.80760700  |
| F  | -2.25199600 | 1.11885000  | -0.63403400 |
| F  | -3.20304800 | -0.34270100 | -2.64311800 |
| F  | -4.06566800 | -2.91257300 | -2.21583800 |
| F  | -3.95347000 | -3.96342800 | 0.30786300  |
| F  | -3.00801000 | -2.53949700 | 2.33558600  |
| C  | 4.20652100  | -0.57124900 | -0.38972200 |
| H  | 3.77659100  | -1.48897000 | 0.03120700  |
| H  | 4.68425700  | -0.86676400 | -1.33283300 |
| C  | 5.24469000  | 0.03019000  | 0.57139900  |
| H  | 6.05160100  | -0.68172300 | 0.78997200  |
| H  | 5.71134400  | 0.92939100  | 0.15069700  |
| H  | 4.79142500  | 0.31551700  | 1.52836200  |
| C  | 0.91037600  | -0.22614300 | -1.75245400 |
| H  | 1.13462300  | -0.34433500 | -2.82086500 |
| H  | 0.04059400  | 0.43914400  | -1.70208700 |
| C  | 3.21012200  | 2.50613900  | -1.98776300 |
| H  | 4.05443000  | 2.97619900  | -1.46883500 |
| H  | 3.59546500  | 2.15301000  | -2.95335600 |
| C  | 0.58631500  | -1.58870000 | -1.11928000 |
| H  | 0.33715200  | -1.49681000 | -0.05780100 |
| H  | -0.27375800 | -2.06035300 | -1.61134300 |
| H  | 1.43022400  | -2.28436800 | -1.20350600 |
| C  | 2.07300600  | 3.51925800  | -2.19914100 |
| H  | 1.22755400  | 3.07388400  | -2.73764800 |
| H  | 1.68938600  | 3.90095000  | -1.24508800 |
| H  | 2.41128200  | 4.38449600  | -2.78384000 |
| Sn | 2.59132700  | 0.78066100  | -0.85556500 |
| H  | 2.05279800  | 1.39267900  | 0.70817200  |

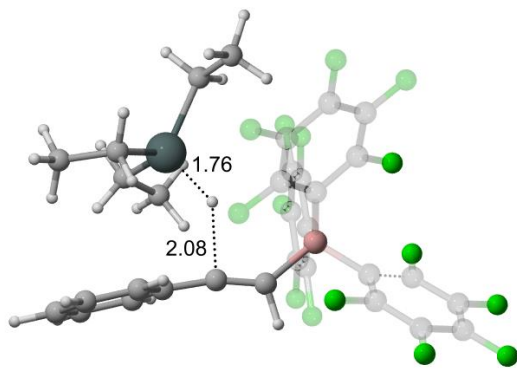

**TS4'**

|   |             |             |             |    |             |             |             |
|---|-------------|-------------|-------------|----|-------------|-------------|-------------|
| C | 3.14079500  | -3.07304700 | 0.95636800  | F  | -4.28721100 | -5.60375600 | 0.43668200  |
| C | 1.84156400  | -2.68909200 | 0.65476700  | F  | -4.62314300 | -3.99596400 | 2.62897500  |
| C | 1.45953400  | -1.33325700 | 0.79771500  | F  | -3.83541900 | -1.46932500 | 2.59709900  |
| C | 2.39704500  | -0.37705200 | 1.26036900  | F  | -2.29554400 | -2.02628300 | -1.87721400 |
| C | 3.69282900  | -0.77648100 | 1.56198200  | F  | -3.10668700 | -4.57821800 | -1.81655000 |
| C | 4.06236600  | -2.11895600 | 1.41049300  | F  | -0.27753900 | 1.26119500  | 2.09176800  |
| H | 3.44133000  | -4.11005400 | 0.84347800  | F  | -0.84075700 | 2.85412500  | 4.11150400  |
| H | 1.10907900  | -3.40998900 | 0.30748200  | F  | -3.43311900 | 3.45961000  | 4.76423700  |
| H | 2.08351600  | 0.65524400  | 1.36939100  | F  | -5.47660000 | 2.36508100  | 3.29856500  |
| H | 4.41601000  | -0.04937300 | 1.91767300  | F  | -4.94413100 | 0.71623200  | 1.25915400  |
| H | 5.07646000  | -2.42600500 | 1.65037700  | F  | -1.26301900 | 2.33137900  | -0.81594500 |
| C | 0.17592300  | -0.91420000 | 0.41963200  | F  | -2.22600000 | 3.91306600  | -2.76451500 |
| C | -0.81519700 | -0.37010900 | -0.16742300 | F  | -4.57270600 | 3.27110700  | -4.03059700 |
| H | -0.57762200 | -0.12906900 | -1.21055400 | F  | -5.92611100 | 1.01063600  | -3.29811600 |
| B | -2.42435900 | -0.07929400 | 0.23218200  | F  | -4.99452200 | -0.57516800 | -1.37235600 |
| C | -3.06260900 | 0.78603700  | -1.00956300 | C  | 0.11210300  | -4.13965500 | 3.35211900  |
| C | -4.25706500 | 0.51348100  | -1.67908500 | H  | 1.13688600  | -4.14668300 | 2.96401300  |
| C | -2.42427400 | 1.95959000  | -1.41876100 | H  | 0.14585400  | -4.67241000 | 4.31159100  |
| C | -4.77350400 | 1.32812400  | -2.68637600 | C  | -0.84370100 | -4.85308700 | 2.38289900  |
| C | -2.89852000 | 2.80161000  | -2.41876100 | H  | -0.51061800 | -5.87538200 | 2.16013700  |
| C | -4.09014000 | 2.47983900  | -3.06186000 | H  | -1.85515600 | -4.92724700 | 2.79812700  |
| C | -2.59319200 | 0.86675100  | 1.56353400  | H  | -0.93028300 | -4.31984200 | 1.42775300  |
| C | -1.59873300 | 1.47070900  | 2.33360000  | C  | 1.17607000  | -0.93838400 | 4.55818200  |
| C | -3.89443400 | 1.22597900  | 1.93917200  | H  | 0.79705000  | -0.40999700 | 5.44193200  |
| C | -1.85719500 | 2.33200400  | 3.39998800  | H  | 1.43661600  | -0.16145200 | 3.83165200  |
| C | -4.20114600 | 2.08190600  | 2.99023000  | C  | -2.13196000 | -2.03162900 | 5.11485700  |
| C | -3.16735600 | 2.64269300  | 3.73526000  | H  | -2.94817400 | -2.63688200 | 4.70847200  |
| C | -3.02580800 | -1.59927700 | 0.34817600  | H  | -1.78217600 | -2.54348300 | 6.02284000  |
| C | -2.87776000 | -2.47238100 | -0.73554000 | C  | 2.41118100  | -1.77521400 | 4.92480900  |
| C | -3.63554900 | -2.17556600 | 1.46157100  | H  | 2.81505100  | -2.30512700 | 4.05469500  |
| C | -3.29179500 | -3.79803200 | -0.73795200 | H  | 3.21736400  | -1.14757300 | 5.32801500  |
| C | -4.07049800 | -3.49985600 | 1.50653600  | H  | 2.17903400  | -2.53140500 | 5.68499700  |
| C | -3.89769800 | -4.32153000 | 0.40135200  | C  | -2.62589700 | -0.61876400 | 5.45578600  |
|   |             |             |             | H  | -1.81980000 | 0.01910200  | 5.83956800  |
|   |             |             |             | H  | -3.04933300 | -0.12634600 | 4.57687900  |
|   |             |             |             | H  | -3.41049100 | -0.64798700 | 6.22289600  |
|   |             |             |             | Sn | -0.46176000 | -2.09841400 | 3.76189700  |
|   |             |             |             | H  | -0.82078900 | -1.45097200 | 2.16923100  |

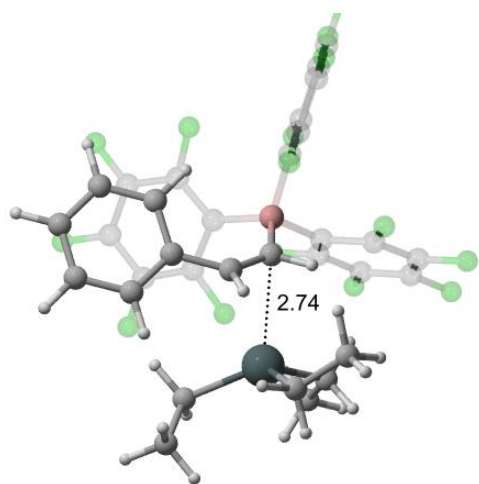

7

|   |             |             |             |
|---|-------------|-------------|-------------|
| C | 3.50319200  | 0.51831600  | 3.48948900  |
| C | 2.72442800  | 0.49710100  | 2.33399200  |
| C | 1.36791200  | 0.86609600  | 2.37362100  |
| C | 0.83325700  | 1.33821100  | 3.58237200  |
| C | 1.61556500  | 1.37586700  | 4.73594400  |
| C | 2.94517800  | 0.94801800  | 4.69811500  |
| H | 4.54365400  | 0.20907000  | 3.44692300  |
| H | 3.16907200  | 0.18422200  | 1.39317000  |
| H | -0.18404300 | 1.70612300  | 3.60939100  |
| H | 1.18331900  | 1.74029300  | 5.66343100  |
| H | 3.54940500  | 0.96744800  | 5.60057300  |
| C | 0.56689500  | 0.85969700  | 1.13523000  |
| C | -0.76588100 | 0.56306900  | 0.95773500  |
| H | -1.11978900 | 0.86229300  | -0.03204200 |
| B | -1.96817800 | 0.07483000  | 1.97890100  |
| C | -3.06253400 | -0.78455900 | 1.06583700  |
| C | -3.55840300 | -2.06405100 | 1.33065500  |
| C | -3.62892500 | -0.18822200 | -0.06777600 |
| C | -4.48564300 | -2.72117700 | 0.52197900  |
| C | -4.56154400 | -0.79884300 | -0.90066000 |
| C | -4.98990900 | -2.08942800 | -0.60826000 |
| C | -2.82560000 | 1.39032400  | 2.49101300  |
| C | -2.52958100 | 2.72895500  | 2.24443400  |
| C | -4.01955500 | 1.18615100  | 3.19171000  |
| C | -3.33470800 | 3.79103800  | 2.65641000  |
| C | -4.85514100 | 2.20891400  | 3.62220700  |
| C | -4.50892300 | 3.53069300  | 3.35104300  |
| C | -1.33891700 | -0.79448900 | 3.23220800  |
| C | -0.60028800 | -1.94296000 | 2.96744000  |
| C | -1.36577100 | -0.46660700 | 4.58968300  |
| C | 0.07911300  | -2.70747500 | 3.90318000  |

|    |             |             |             |
|----|-------------|-------------|-------------|
| C  | -0.71037800 | -1.19910200 | 5.57962900  |
| C  | 0.02606000  | -2.32636800 | 5.23990600  |
| F  | 0.67825100  | -3.02859000 | 6.17647700  |
| F  | -0.74864400 | -0.79326000 | 6.85943900  |
| F  | -1.98021400 | 0.65376900  | 5.03395400  |
| F  | -0.53063400 | -2.40169300 | 1.67765100  |
| F  | 0.77258600  | -3.79977700 | 3.53380400  |
| F  | -1.40675800 | 3.08253800  | 1.56530300  |
| F  | -2.98546800 | 5.06027500  | 2.38179000  |
| F  | -5.29801700 | 4.53630300  | 3.75606300  |
| F  | -5.98281100 | 1.93992300  | 4.30091400  |
| F  | -4.39867800 | -0.07322600 | 3.51016800  |
| F  | -3.26960800 | 1.07388800  | -0.42655500 |
| F  | -5.03898300 | -0.16165100 | -1.98357000 |
| F  | -5.87623000 | -2.70973300 | -1.39991100 |
| F  | -4.89635400 | -3.96309500 | 0.82783300  |
| F  | -3.16766900 | -2.75796800 | 2.42252000  |
| C  | 2.13664600  | -2.41493400 | 0.47262700  |
| H  | 2.19855700  | -2.06603900 | 1.50707700  |
| H  | 1.77969000  | -3.44949000 | 0.51883300  |
| C  | 3.50113500  | -2.32697200 | -0.22513900 |
| H  | 4.25016400  | -2.92105800 | 0.31316400  |
| H  | 3.46519900  | -2.70590800 | -1.25369400 |
| H  | 3.87569000  | -1.29741900 | -0.27296200 |
| C  | -1.05580500 | -2.35502100 | -1.38607800 |
| H  | -0.86781000 | -2.27422200 | -2.46597900 |
| H  | -1.97064000 | -1.79474000 | -1.18924200 |
| C  | 1.36548000  | 0.04235100  | -2.03634400 |
| H  | 2.26999100  | 0.54222000  | -1.67005000 |
| H  | 1.69111400  | -0.61504000 | -2.85552700 |
| C  | -1.20733100 | -3.82325100 | -0.96918200 |
| H  | -1.44997200 | -3.92149000 | 0.09130000  |
| H  | -2.01782800 | -4.29494000 | -1.53885900 |
| H  | -0.29587200 | -4.40319600 | -1.15867200 |
| C  | 0.34417000  | 1.06535900  | -2.55906800 |
| H  | -0.57182600 | 0.58139100  | -2.91841100 |
| H  | 0.04982400  | 1.78498800  | -1.78630000 |
| H  | 0.75678400  | 1.64425000  | -3.39446000 |
| Sn | 0.60281100  | -1.29239600 | -0.52376600 |
| H  | 1.09344700  | 1.30558600  | 0.28776100  |



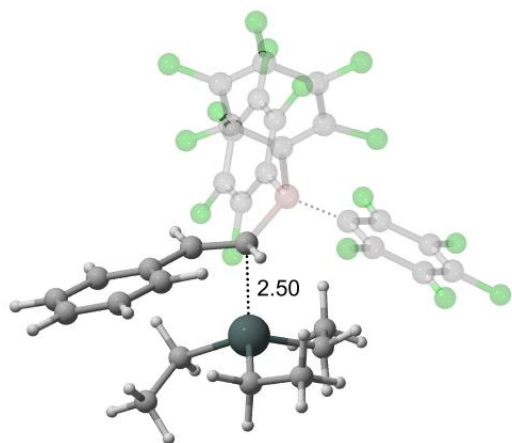

7'

|   |             |             |             |    |             |             |             |
|---|-------------|-------------|-------------|----|-------------|-------------|-------------|
| C | 2.98198900  | -2.20893100 | 2.43246100  | C  | -5.51517900 | -1.86827100 | 2.92612700  |
| C | 1.61594300  | -2.21951400 | 2.16009200  | C  | -5.26297900 | -3.21111400 | 2.66171400  |
| C | 0.99492600  | -1.11457600 | 1.54686800  | F  | -5.99374100 | -4.17177600 | 3.24343100  |
| C | 1.77524300  | 0.01721700  | 1.23803000  | F  | -6.50969600 | -1.53291800 | 3.76219800  |
| C | 3.13848800  | 0.02948000  | 1.51509400  | F  | -5.10261500 | 0.38724000  | 2.58530900  |
| C | 3.74683800  | -1.08523500 | 2.10581900  | F  | -2.56084700 | -2.93735100 | 0.29172800  |
| H | 3.44850700  | -3.07007700 | 2.90160200  | F  | -3.98743700 | -4.82292700 | 1.47892200  |
| H | 1.01626400  | -3.08896200 | 2.41674500  | F  | -1.61537200 | -0.17170700 | 3.41494900  |
| H | 1.30916300  | 0.89252600  | 0.79715000  | F  | -1.20432700 | 1.75786200  | 5.19580600  |
| H | 3.72869200  | 0.91027600  | 1.27975800  | F  | -2.08323500 | 4.31382500  | 4.71518600  |
| H | 4.81124200  | -1.07076900 | 2.32204800  | F  | -3.40142700 | 4.85867800  | 2.37932700  |
| C | -0.43933300 | -1.18217000 | 1.27341000  | F  | -3.83328300 | 2.96750900  | 0.58307800  |
| C | -1.19540800 | -0.30966600 | 0.51800900  | F  | -1.67352800 | 2.11491800  | -1.00338000 |
| H | -0.63038400 | 0.52749500  | 0.10574400  | F  | -2.51676200 | 2.83799900  | -3.42307400 |
| B | -2.80409800 | 0.05232000  | 0.74515000  | F  | -4.80344900 | 1.75432000  | -4.48503800 |
| C | -3.44498900 | 0.54404100  | -0.69203000 | F  | -6.21061800 | -0.09193600 | -3.03059200 |
| C | -4.61790200 | 0.05604400  | -1.27155400 | F  | -5.38953200 | -0.86122800 | -0.64118800 |
| C | -2.79026500 | 1.50046100  | -1.47718000 | C  | -2.14446000 | -1.81731500 | -2.85431200 |
| C | -5.08664600 | 0.44482900  | -2.52803500 | H  | -2.51470200 | -0.79873900 | -2.98270200 |
| C | -3.21254500 | 1.91902900  | -2.73192200 | H  | -1.56949800 | -2.04942000 | -3.76458100 |
| C | -4.37738100 | 1.37898900  | -3.27108600 | C  | -3.29219700 | -2.81635700 | -2.68509700 |
| C | -2.66039500 | 1.29588500  | 1.84081100  | H  | -3.93599300 | -2.80829300 | -3.57385800 |
| C | -2.03389400 | 1.07635600  | 3.07351300  | H  | -2.92786900 | -3.84113200 | -2.55022300 |
| C | -3.12001700 | 2.60711700  | 1.67355900  | H  | -3.91944000 | -2.57652300 | -1.82479100 |
| C | -1.82413300 | 2.05506200  | 4.04017000  | C  | 1.09052600  | -0.68311900 | -2.13686800 |
| C | -2.93446900 | 3.62084900  | 2.61179500  | H  | 1.49530900  | -1.32761400 | -2.93098200 |
| C | -2.27183700 | 3.34925300  | 3.80357300  | H  | 1.86822400  | -0.63381000 | -1.36808200 |
| C | -3.68372600 | -1.15423400 | 1.43499700  | C  | 0.09652300  | -3.78075900 | -0.82078300 |
| C | -3.50516200 | -2.51194400 | 1.19168300  | H  | -0.14611300 | -3.95945000 | 0.23009200  |
| C | -4.74137900 | -0.88604100 | 2.31368100  | H  | -0.50846500 | -4.49269100 | -1.39570500 |
| C | -4.24581900 | -3.53595500 | 1.77341900  | C  | 0.77638600  | 0.71092800  | -2.69534600 |
|   |             |             |             | H  | 0.44925000  | 1.40120200  | -1.91270200 |
|   |             |             |             | H  | 1.66109600  | 1.15205200  | -3.17196900 |
|   |             |             |             | H  | -0.01905700 | 0.68346000  | -3.44956300 |
|   |             |             |             | C  | 1.59451400  | -3.99720800 | -1.08180800 |
|   |             |             |             | H  | 1.85157200  | -3.86145900 | -2.13919300 |
|   |             |             |             | H  | 2.21085100  | -3.30151500 | -0.50202800 |
|   |             |             |             | H  | 1.89738600  | -5.01501100 | -0.80373100 |
|   |             |             |             | Sn | -0.57897200 | -1.81075100 | -1.37939800 |
|   |             |             |             | H  | -0.94662400 | -2.00886200 | 1.76471200  |

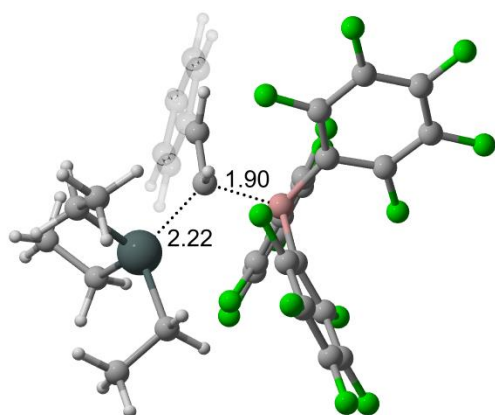

TS5

|   |             |             |             |
|---|-------------|-------------|-------------|
| C | 2.41506600  | 1.84513800  | 4.67219300  |
| C | 1.57440600  | 2.04582000  | 3.58369000  |
| C | 1.15478700  | 0.95634800  | 2.78383100  |
| C | 1.64820900  | -0.32983100 | 3.08409400  |
| C | 2.50292600  | -0.52808900 | 4.15931200  |
| C | 2.87782600  | 0.55620200  | 4.96279100  |
| H | 2.70770900  | 2.68342900  | 5.29667200  |
| H | 1.20080600  | 3.04106500  | 3.35841500  |
| H | 1.35651200  | -1.16623900 | 2.47055700  |
| H | 2.87258600  | -1.52491400 | 4.38031200  |
| H | 3.53368800  | 0.39626500  | 5.81379300  |
| C | 0.19810400  | 1.22357600  | 1.74248400  |
| C | -0.65373000 | 0.36917300  | 1.03591300  |
| H | -1.15907300 | 0.96123500  | 0.27632200  |
| B | -2.11833200 | 0.02669800  | 2.19603200  |
| C | -3.22562200 | -0.84039000 | 1.35490700  |
| C | -3.91951400 | -1.94984000 | 1.85791700  |
| C | -3.70602500 | -0.39292700 | 0.11808400  |
| C | -4.94955300 | -2.59440700 | 1.17398100  |
| C | -4.72908400 | -1.00308500 | -0.59825700 |
| C | -5.35629800 | -2.12504300 | -0.06922000 |
| C | -2.92087100 | 1.42150200  | 2.54473500  |
| C | -2.83862300 | 2.67793800  | 1.94273800  |
| C | -3.94658800 | 1.32442200  | 3.49724000  |
| C | -3.66095300 | 3.75644400  | 2.27412300  |
| C | -4.78885300 | 2.36684600  | 3.86071700  |
| C | -4.64376600 | 3.60567400  | 3.24217700  |
| C | -1.44500800 | -0.70492300 | 3.47200400  |
| C | -1.00152500 | -2.02831400 | 3.40910200  |
| C | -1.16137100 | -0.07382700 | 4.68804800  |
| C | -0.38582700 | -2.70469100 | 4.45384100  |
| C | -0.54994700 | -0.70824800 | 5.76689100  |

|    |             |             |             |
|----|-------------|-------------|-------------|
| C  | -0.16091300 | -2.03710500 | 5.65342500  |
| F  | 0.45764600  | -2.65514800 | 6.66914500  |
| F  | -0.29920800 | -0.03546800 | 6.90173000  |
| F  | -1.44685900 | 1.23455000  | 4.87381500  |
| F  | -1.13425300 | -2.72628200 | 2.25109100  |
| F  | 0.02525600  | -3.97583200 | 4.30382200  |
| F  | -1.93573800 | 2.94863400  | 0.96238000  |
| F  | -3.50898000 | 4.93858000  | 1.65302700  |
| F  | -5.44152200 | 4.63030800  | 3.57169600  |
| F  | -5.73572000 | 2.19216800  | 4.79585500  |
| F  | -4.15267400 | 0.14672200  | 4.13090800  |
| F  | -3.16309900 | 0.70250300  | -0.47079000 |
| F  | -5.10191300 | -0.52734500 | -1.79802500 |
| F  | -6.33870900 | -2.73723200 | -0.74220700 |
| F  | -5.56064100 | -3.65983200 | 1.71504600  |
| F  | -3.64511400 | -2.45973100 | 3.07603100  |
| C  | 1.61033700  | -2.67387200 | 0.56726700  |
| H  | 1.41594800  | -2.98591400 | 1.59845000  |
| H  | 1.47841400  | -3.58276000 | -0.03500400 |
| C  | 3.04352500  | -2.14716100 | 0.39597400  |
| H  | 3.78315400  | -2.89481800 | 0.71150100  |
| H  | 3.25662500  | -1.89955400 | -0.65026900 |
| H  | 3.22601500  | -1.24081900 | 0.98490300  |
| C  | -1.52000600 | -2.51754100 | -1.03112000 |
| H  | -2.18910200 | -1.84145100 | -1.57195700 |
| H  | -2.11053500 | -2.99040700 | -0.24190800 |
| C  | 0.93792900  | -0.18433300 | -1.77917200 |
| H  | 1.66440200  | 0.51339100  | -1.34249200 |
| H  | 1.51415400  | -0.87093400 | -2.41379600 |
| C  | -0.95651300 | -3.57437900 | -1.99617200 |
| H  | -0.32298000 | -4.30469200 | -1.47886000 |
| H  | -1.76552900 | -4.13535200 | -2.48156000 |
| H  | -0.35423400 | -3.12166500 | -2.79447100 |
| C  | -0.09971900 | 0.57266400  | -2.62241200 |
| H  | -0.82128200 | -0.11213400 | -3.08446800 |
| H  | -0.67485000 | 1.28666700  | -2.02101400 |
| H  | 0.37524500  | 1.14049000  | -3.4333100  |
| Sn | 0.06904300  | -1.34731000 | -0.17476500 |
| H  | 0.07582300  | 2.29053800  | 1.55379400  |

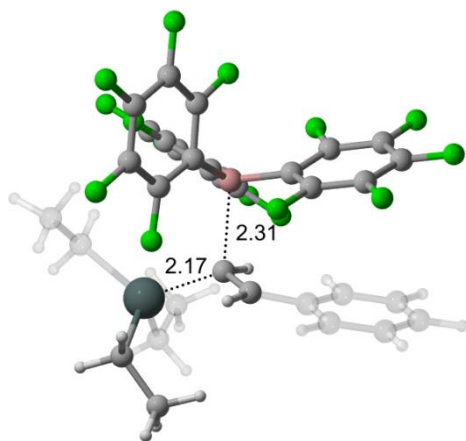

TS5'

|   |             |             |             |
|---|-------------|-------------|-------------|
| C | 2.17671600  | -0.44866400 | 3.82092800  |
| C | 1.39591900  | -1.14615400 | 2.90318400  |
| C | 0.82340000  | -0.49168100 | 1.79383900  |
| C | 1.07573600  | 0.88572400  | 1.61975200  |
| C | 1.85116500  | 1.58288800  | 2.53913300  |
| C | 2.39896300  | 0.92044200  | 3.64529300  |
| H | 2.59560900  | -0.96400200 | 4.67998900  |
| H | 1.19404500  | -2.20346100 | 3.05319700  |
| H | 0.64857900  | 1.41323100  | 0.77551800  |
| H | 2.02595600  | 2.64600400  | 2.40081400  |
| H | 2.99483600  | 1.47147400  | 4.36737400  |
| C | -0.05830600 | -1.24929600 | 0.91575500  |
| C | -0.76458600 | -0.76679000 | -0.15670300 |
| H | -0.49921100 | 0.24991200  | -0.42630100 |
| B | -2.75232100 | -0.01861000 | 0.76140800  |
| C | -3.16461500 | 0.75903700  | -0.57641700 |
| C | -4.32568100 | 0.45952600  | -1.30748900 |
| C | -2.41812800 | 1.81828300  | -1.11926200 |
| C | -4.72030900 | 1.14593200  | -2.45486900 |
| C | -2.77141900 | 2.52300500  | -2.26084200 |
| C | -3.93768700 | 2.18504800  | -2.94099100 |
| C | -2.23594000 | 0.79381800  | 2.03826600  |
| C | -1.75217600 | 0.11035000  | 3.16686300  |
| C | -2.32262000 | 2.18373800  | 2.21213100  |
| C | -1.30128100 | 0.73124600  | 4.32478900  |
| C | -1.87497900 | 2.84575500  | 3.35272000  |
| C | -1.34470900 | 2.11779900  | 4.41251800  |
| C | -3.68296700 | -1.24630000 | 1.22724200  |
| C | -3.47160600 | -2.61809600 | 1.16267400  |
| C | -4.87494400 | -0.87289900 | 1.86012400  |
| C | -4.36216000 | -3.56056000 | 1.67357400  |
| C | -5.79505800 | -1.77291700 | 2.38141500  |

|    |             |             |             |
|----|-------------|-------------|-------------|
| C  | -5.53556700 | -3.13833500 | 2.28612200  |
| F  | -6.40432400 | -4.03008000 | 2.77798600  |
| F  | -6.92443100 | -1.34412500 | 2.96365300  |
| F  | -5.18147500 | 0.44222900  | 1.95709500  |
| F  | -2.35158300 | -3.13049400 | 0.59671400  |
| F  | -4.09135800 | -4.87179600 | 1.57325200  |
| F  | -1.69094900 | -1.23926100 | 3.16743000  |
| F  | -0.82562800 | 0.00812500  | 5.34986000  |
| F  | -0.90740200 | 2.74158500  | 5.51182800  |
| F  | -1.97439200 | 4.18049000  | 3.44754300  |
| F  | -2.91231600 | 2.96718200  | 1.28883800  |
| F  | -1.25681100 | 2.20796500  | -0.54321600 |
| F  | -1.99252300 | 3.51218500  | -2.72102000 |
| F  | -4.29134000 | 2.84360900  | -4.04829600 |
| F  | -5.84313600 | 0.79712600  | -3.09934500 |
| F  | -5.15232500 | -0.53833900 | -0.93750800 |
| C  | -2.96007100 | -2.34603600 | -2.81990900 |
| H  | -3.45915900 | -1.38199600 | -2.95736500 |
| H  | -2.67600200 | -2.67442600 | -3.83054200 |
| C  | -3.91823300 | -3.36926400 | -2.19566100 |
| H  | -4.76172600 | -3.57708400 | -2.86674300 |
| H  | -3.41954000 | -4.32293000 | -1.98665700 |
| H  | -4.34009000 | -3.00369300 | -1.25656800 |
| C  | 0.16176700  | -0.99657000 | -3.34918900 |
| H  | 0.19467800  | -1.63084200 | -4.24584100 |
| H  | 1.19210100  | -0.94227100 | -2.97503100 |
| C  | -0.07769800 | -3.92620500 | -1.44915500 |
| H  | -0.55524300 | -4.38199100 | -0.57494500 |
| H  | -0.27946700 | -4.60069000 | -2.29204700 |
| C  | -0.34216200 | 0.40780700  | -3.71483500 |
| H  | -0.28631900 | 1.08909800  | -2.85873900 |
| H  | 0.25352900  | 0.85822600  | -4.51974500 |
| H  | -1.38530300 | 0.39245700  | -4.05511200 |
| C  | 1.43847200  | -3.79464900 | -1.23206400 |
| H  | 1.94134700  | -3.39562100 | -2.12123200 |
| H  | 1.67505500  | -3.12023400 | -0.39924800 |
| H  | 1.89952700  | -4.76493000 | -1.00406400 |
| Sn | -1.03920800 | -2.04714800 | -1.88772200 |
| H  | -0.17247000 | -2.29531200 | 1.19548100  |

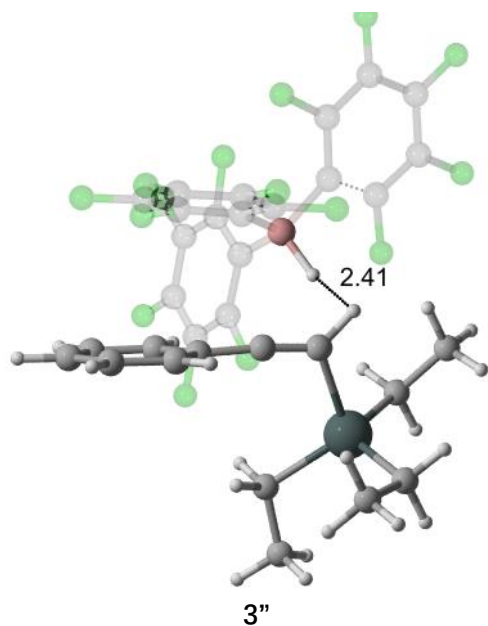

|    |              |             |             |   |              |             |             |
|----|--------------|-------------|-------------|---|--------------|-------------|-------------|
| C  | -9.59573700  | -5.35544300 | -2.20056400 | H | -7.71439300  | -1.09892200 | -6.44935200 |
| C  | -10.14635100 | -4.56095200 | -3.19740300 | H | -7.07635800  | -2.41695000 | -7.44193300 |
| C  | -9.54195500  | -3.31818900 | -3.51339500 | C | -8.75262300  | -5.31190500 | -8.34019700 |
| C  | -8.39187900  | -2.88427900 | -2.80733100 | H | -9.48478100  | -5.48575000 | -9.13829700 |
| C  | -7.87006000  | -3.67919100 | -1.79753800 | H | -7.97486400  | -4.65089300 | -8.74236300 |
| C  | -8.47030600  | -4.91131700 | -1.49709900 | H | -8.27905800  | -6.27753600 | -8.12387800 |
| H  | -10.05960200 | -6.30362400 | -1.94940400 | H | -11.35943100 | -1.03935800 | -5.44761600 |
| H  | -11.02769900 | -4.87218900 | -3.74301000 | B | -13.89458300 | -2.85391300 | -4.19631600 |
| H  | -7.95133900  | -1.92235500 | -3.04896000 | C | -15.22963400 | -1.93125400 | -4.33574300 |
| H  | -7.00457200  | -3.34417800 | -1.23501500 | C | -15.85674600 | -1.83556700 | -5.57880900 |
| H  | -8.06100800  | -5.52483700 | -0.69978500 | C | -15.83790900 | -1.19297900 | -3.32205100 |
| C  | -10.13045000 | -2.49235100 | -4.47134400 | C | -16.98777500 | -1.06331200 | -5.82307500 |
| C  | -10.63665000 | -1.84778900 | -5.41758300 | C | -16.96951200 | -0.40287200 | -3.51592000 |
| Sn | -10.30870600 | -2.81306000 | -7.44096500 | C | -17.54970600 | -0.33513300 | -4.77841500 |
| C  | -12.29866800 | -2.66268900 | -8.22714900 | C | -14.26452200 | -4.43732700 | -4.34139900 |
| H  | -12.26074500 | -3.03657600 | -9.25900400 | C | -15.39438400 | -5.03059800 | -3.77381500 |
| H  | -12.93084300 | -3.34478300 | -7.65330200 | C | -13.47705700 | -5.30990600 | -5.08406000 |
| C  | -8.86177900  | -1.45694900 | -8.27997300 | C | -15.72913100 | -6.37228200 | -3.93888300 |
| H  | -8.67760800  | -1.76846500 | -9.31668700 | C | -13.75956700 | -6.65872100 | -5.27711200 |
| H  | -9.31015600  | -0.45792400 | -8.33051600 | C | -14.90396100 | -7.19708400 | -4.70007400 |
| C  | -9.41084900  | -4.72745600 | -7.07859800 | C | -12.98101800 | -2.50753600 | -2.88381000 |
| H  | -8.66541000  | -4.60021100 | -6.28372600 | C | -12.64949000 | -3.36583100 | -1.83700000 |
| H  | -10.17938800 | -5.40143500 | -6.69032200 | C | -12.34987600 | -1.26181700 | -2.81137300 |
| C  | -12.86144000 | -1.23569100 | -8.18216300 | C | -11.74857100 | -3.03978200 | -0.82047800 |
| H  | -12.22502000 | -0.51839700 | -8.71525300 | C | -11.44032300 | -0.89017500 | -1.82532900 |
| H  | -13.85599600 | -1.20386800 | -8.64114500 | C | -11.13011400 | -1.79575100 | -0.81596400 |
| H  | -12.98566400 | -0.88815500 | -7.15074500 | F | -10.23775900 | -1.47796700 | 0.13739200  |
| C  | -7.54909600  | -1.42786400 | -7.48244900 | F | -10.84314100 | 0.31580500  | -1.85002300 |
| H  | -6.82382800  | -0.73829500 | -7.93250600 | F | -12.60456400 | -0.32950600 | -3.76605900 |
|    |              |             |             | F | -13.17074900 | -4.61402900 | -1.76387000 |
|    |              |             |             | F | -11.44496000 | -3.93311800 | 0.13811900  |
|    |              |             |             | F | -16.21781600 | -4.29909800 | -2.99173900 |
|    |              |             |             | F | -16.83050400 | -6.88615600 | -3.36526300 |
|    |              |             |             | F | -15.20510200 | -8.49489000 | -4.86891800 |
|    |              |             |             | F | -12.93822800 | -7.43983800 | -6.00984500 |
|    |              |             |             | F | -12.31894200 | -4.86518300 | -5.66800100 |
|    |              |             |             | F | -15.34369200 | -1.22345400 | -2.05972700 |
|    |              |             |             | F | -17.50869900 | 0.29205800  | -2.49736500 |
|    |              |             |             | F | -18.63981900 | 0.42235300  | -4.98731300 |
|    |              |             |             | F | -17.53976800 | -1.00975100 | -7.05105200 |
|    |              |             |             | F | -15.36300500 | -2.53322300 | -6.63615700 |
|    |              |             |             | H | -13.19707800 | -2.57211400 | -5.14613400 |

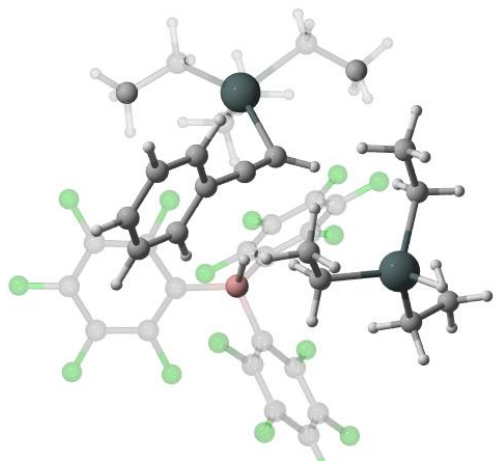

8

|   |             |             |             |   |             |             |             |
|---|-------------|-------------|-------------|---|-------------|-------------|-------------|
| C | -1.45451900 | 0.39177500  | -2.38453500 | H | 0.88384000  | 3.69698800  | -0.79610400 |
| C | -0.59576700 | -0.50069200 | -2.53906000 | C | -0.05742400 | 3.63636200  | -2.74415600 |
| C | -2.49927900 | 1.29531800  | -2.19376300 | H | -1.05341800 | 3.91932700  | -2.37577400 |
| C | -3.23710400 | 1.77561800  | -3.30448100 | H | 0.41384700  | 4.54437700  | -3.13912700 |
| C | -2.78445000 | 1.75957500  | -0.88642100 | H | -0.20534300 | 2.95771700  | -3.59339600 |
| C | -4.26338600 | 2.68488700  | -3.09889300 | C | 2.82450700  | 0.82605200  | -3.64306200 |
| H | -2.98887700 | 1.42515100  | -4.30115900 | H | 2.60030000  | -0.10595500 | -3.11021200 |
| C | -3.80322400 | 2.68431400  | -0.70185900 | H | 3.86240700  | 0.72155200  | -3.98502300 |
| H | -2.18188200 | 1.41247600  | -0.05795200 | C | 3.96619800  | 1.94988300  | -0.47566000 |
| C | -4.54417800 | 3.13732300  | -1.80010200 | H | 4.41665000  | 2.86937900  | -0.08184900 |
| H | -4.84054700 | 3.05442600  | -3.94058900 | H | 3.25922900  | 1.59948100  | 0.28244900  |
| H | -4.01628200 | 3.05530500  | 0.29545800  | C | 1.89715700  | 1.00799700  | -4.85481100 |
| H | -5.34306000 | 3.85750900  | -1.64724000 | H | 2.12587100  | 1.93158000  | -5.40046900 |
| C | -0.37640700 | -3.16295200 | -4.49644200 | H | 1.98895700  | 0.17849100  | -5.57065200 |
| H | -0.72232800 | -2.63017400 | -5.39014500 | H | 0.84261200  | 1.06605100  | -4.55815000 |
| H | -0.61028100 | -4.22471800 | -4.65409500 | C | 5.04591300  | 0.88462500  | -0.72099200 |
| C | 1.13402900  | -2.97243200 | -4.29638900 | H | 4.61019800  | -0.05212100 | -1.08759400 |
| H | 1.50162300  | -3.47183400 | -3.39373900 | H | 5.78531000  | 1.21514400  | -1.46175200 |
| H | 1.69525900  | -3.38200200 | -5.14552000 | H | 5.59170400  | 0.65150300  | 0.20287200  |
| H | 1.40485900  | -1.91437700 | -4.21878700 | C | -1.27564100 | -3.69960500 | -1.05568500 |
| C | -4.58540900 | -1.81937300 | -2.21252500 | H | -0.69534200 | -3.08947200 | -0.36258600 |
| H | -5.60752900 | -1.66800500 | -2.58177100 | H | -2.25610000 | -3.84332200 | -0.58882900 |
| H | -4.61472400 | -2.64352400 | -1.49207400 | C | -0.58493400 | -5.04326000 | -1.33087800 |
| H | -4.29716500 | -0.92381700 | -1.65625200 | H | -0.44391900 | -5.59793500 | -0.39515900 |
| C | -3.62492500 | -2.10714500 | -3.37655200 | H | -1.17077700 | -5.68323700 | -2.00230000 |
| H | -3.97234200 | -2.97396600 | -3.95495700 | H | 0.40552000  | -4.91237400 | -1.77958400 |
| H | -3.60242800 | -1.26650200 | -4.08190300 | B | -0.07930400 | 0.00621000  | 1.35887300  |
| H | 0.48443500  | -0.53514900 | -2.57932400 | C | 0.84269700  | 1.18545500  | 1.99982100  |
| H | 3.48621700  | 3.82208100  | -3.04193800 | C | 0.43528500  | 2.51361100  | 1.87340800  |
| C | 0.79501900  | 2.99949000  | -1.63767400 | C | 2.07259000  | 1.02008500  | 2.63536600  |
| H | 0.31182300  | 2.10674400  | -1.22479400 | C | 1.18191900  | 3.60508600  | 2.30040700  |
|   |             |             |             | C | 2.85794200  | 2.08037600  | 3.08594000  |
|   |             |             |             | C | 2.41393300  | 3.38584400  | 2.91043100  |
|   |             |             |             | C | -1.49816600 | -0.21299700 | 2.13860000  |
|   |             |             |             | C | -1.76783500 | 0.13810300  | 3.46267400  |
|   |             |             |             | C | -2.58076700 | -0.77906100 | 1.46914300  |
|   |             |             |             | C | -3.01009300 | -0.03928200 | 4.07067700  |
|   |             |             |             | C | -3.83795100 | -0.98116200 | 2.02710300  |
|   |             |             |             | C | -4.05770900 | -0.60211100 | 3.34711600  |
|   |             |             |             | C | 0.72699900  | -1.39611000 | 1.13501300  |
|   |             |             |             | C | 0.60750200  | -2.54585800 | 1.91731800  |
|   |             |             |             | C | 1.59764900  | -1.53093000 | 0.05575300  |
|   |             |             |             | C | 1.26982500  | -3.74176300 | 1.64026300  |
|   |             |             |             | C | 2.28262600  | -2.69752000 | -0.26398700 |

|    |             |             |             |   |             |             |             |
|----|-------------|-------------|-------------|---|-------------|-------------|-------------|
| C  | 2.11227100  | -3.82218800 | 0.53627800  | C | 2.23669500  | 0.54095700  | -4.40862100 |
| F  | 2.74054600  | -4.97143700 | 0.23718500  | H | 2.47214100  | 0.61024800  | -3.34352600 |
| F  | 3.08986000  | -2.75366900 | -1.34433000 | H | 1.32844500  | 1.13255500  | -4.56170500 |
| F  | 1.82417400  | -0.46909500 | -0.76917600 | C | 3.38968900  | 1.06790400  | -5.27425700 |
| F  | -0.18012100 | -2.54902900 | 3.01591000  | H | 3.15678800  | 1.01985700  | -6.34404600 |
| F  | 1.08963300  | -4.82560500 | 2.41552300  | H | 3.60401800  | 2.11625200  | -5.03138300 |
| F  | -0.79721600 | 0.66266200  | 4.24245100  | H | 4.31620500  | 0.50386300  | -5.11228200 |
| F  | -3.20937500 | 0.32282600  | 5.34960300  | C | 2.12192700  | -3.33481500 | -7.36123300 |
| F  | -5.26263600 | -0.77871100 | 3.91404600  | H | 2.49666700  | -3.47811000 | -8.38295200 |
| F  | -4.83714500 | -1.53125500 | 1.30530700  | H | 2.61565700  | -4.07910900 | -6.72572600 |
| F  | -2.43784700 | -1.18109200 | 0.16965900  | H | 1.05380100  | -3.59116800 | -7.38538200 |
| F  | 2.57825400  | -0.21952100 | 2.84821300  | C | 2.37004200  | -1.90525400 | -6.86576500 |
| F  | 4.04777400  | 1.85499800  | 3.67132600  | H | 3.44531300  | -1.68060000 | -6.89272600 |
| F  | 3.16237200  | 4.42265500  | 3.32237700  | H | 1.89295900  | -1.17316500 | -7.52986300 |
| F  | 0.73300000  | 4.86381400  | 2.12711300  | H | -0.45698900 | -2.57931300 | -6.29515500 |
| F  | -0.77193200 | 2.79511600  | 1.30947900  | H | 0.49634300  | -0.96851100 | -2.76233600 |
| H  | -0.36621200 | 0.39180300  | 0.24781500  | C | -0.99807100 | 1.30605700  | -1.34971400 |
| Sn | 2.80250100  | 2.45733900  | -2.21471400 | H | -2.01223500 | 0.94417000  | -1.53278700 |
| Sn | -1.59224500 | -2.53904700 | -2.82999000 | H | -1.02509300 | 1.84120400  | -0.39928200 |

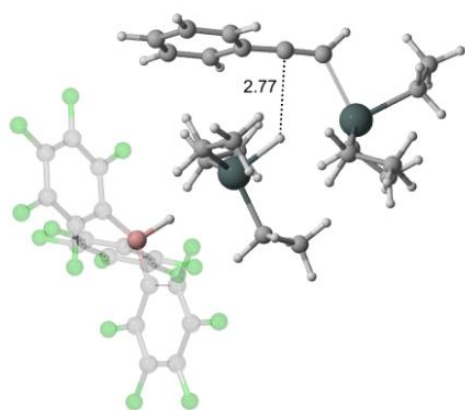

**8'**

|   |             |             |             |   |             |             |             |
|---|-------------|-------------|-------------|---|-------------|-------------|-------------|
| C | -1.39584800 | -1.46029300 | -4.73040300 | H | -0.56099400 | -4.36660800 | -0.34765800 |
| C | -0.46927800 | -1.94653100 | -5.41683400 | H | -0.22154400 | -3.55117400 | -1.88300400 |
| C | -2.38568200 | -0.90032300 | -3.92760300 | C | 3.35970700  | -0.97600700 | -0.82787500 |
| C | -2.95283700 | 0.35402500  | -4.27307400 | H | 3.12638600  | -1.94081700 | -0.36189300 |
| C | -2.86754700 | -1.61350300 | -2.79874000 | H | 3.44780600  | -1.14409600 | -1.90797400 |
| C | -3.98416300 | 0.87167400  | -3.50492400 | H | 4.35247100  | -0.67641200 | -0.46658400 |
| H | -2.56960600 | 0.89208700  | -5.13359800 | C | 2.37688100  | -3.20239500 | -3.66265200 |
| C | -3.88917700 | -1.07328700 | -2.03273800 | H | 2.12800200  | -3.02859900 | -2.61588800 |
| H | -2.41661400 | -2.56572700 | -2.54326600 | H | 1.78572500  | -4.06391500 | -3.99581700 |
| C | -4.44806000 | 0.16252200  | -2.38734600 | C | 3.87983200  | -3.47334400 | -3.84029600 |
| H | -4.41963500 | 1.83336000  | -3.75630300 | H | 4.18002700  | -4.36408400 | -3.27429600 |
| H | -4.24171500 | -1.59087900 | -1.14730000 | H | 4.15001700  | -3.64780600 | -4.88852000 |
| H | -5.23496400 | 0.58419100  | -1.77104200 | H | 4.49065600  | -2.64034600 | -3.47287700 |

|    |             |             |             |
|----|-------------|-------------|-------------|
| B  | -0.33043600 | 0.73070200  | 2.42445600  |
| C  | 0.92656100  | 1.67924500  | 2.84708900  |
| C  | 1.48187400  | 2.56797400  | 1.92668500  |
| C  | 1.55497200  | 1.67826100  | 4.09302500  |
| C  | 2.58299600  | 3.37685600  | 2.18426300  |
| C  | 2.66068800  | 2.46905400  | 4.40165900  |
| C  | 3.18410900  | 3.32402300  | 3.43759400  |
| C  | -1.74789400 | 1.53225900  | 2.30813800  |
| C  | -2.02947100 | 2.78642900  | 2.85122500  |
| C  | -2.80015200 | 0.97807300  | 1.57869500  |
| C  | -3.24235800 | 3.45380800  | 2.67237200  |
| C  | -4.02505000 | 1.59929700  | 1.37720100  |
| C  | -4.25092300 | 2.85762300  | 1.92439100  |
| C  | -0.41855700 | -0.63530600 | 3.30966400  |
| C  | -1.42723300 | -0.96874000 | 4.21290100  |
| C  | 0.57203200  | -1.60893300 | 3.17083700  |
| C  | -1.47162200 | -2.17526600 | 4.91054800  |
| C  | 0.57474300  | -2.82539100 | 3.84397900  |
| C  | -0.46430300 | -3.11526900 | 4.72303600  |
| F  | -0.49246800 | -4.28710900 | 5.38125300  |
| F  | 1.55904100  | -3.72516900 | 3.64760000  |
| F  | 1.61959200  | -1.38837100 | 2.33066100  |
| F  | -2.43504200 | -0.10135200 | 4.47440600  |
| F  | -2.47859200 | -2.44108800 | 5.76343400  |
| F  | -1.11620400 | 3.43034600  | 3.61256200  |
| F  | -3.44768900 | 4.66705100  | 3.21550200  |
| F  | -5.42647300 | 3.48223800  | 1.73249600  |
| F  | -4.99916200 | 0.99846500  | 0.65043500  |
| F  | -2.65784600 | -0.25311700 | 1.01585600  |
| F  | 1.09053200  | 0.89754600  | 5.09710900  |
| F  | 3.22615800  | 2.41758600  | 5.62168100  |
| F  | 4.25268100  | 4.09147000  | 3.71310800  |
| F  | 3.07249400  | 4.20360300  | 1.23804600  |
| F  | 0.93110600  | 2.69094700  | 0.68826000  |
| H  | -0.08781900 | 0.35361500  | 1.28922000  |
| Sn | 0.28273200  | -0.39901400 | -1.06106300 |
| Sn | 1.74183300  | -1.50902900 | -4.82125200 |

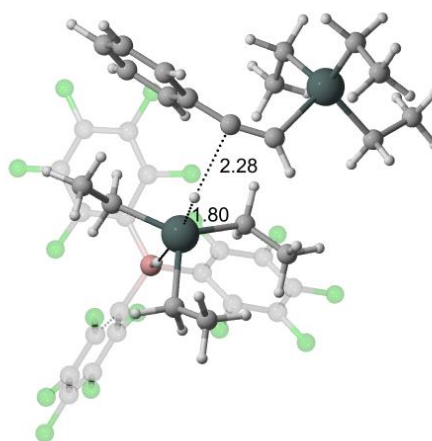

### TS6

|   |             |             |             |
|---|-------------|-------------|-------------|
| C | 2.02029400  | 3.34945500  | 2.25202600  |
| C | 2.80330800  | 2.47037300  | 1.79443800  |
| C | 0.88865300  | 4.04819000  | 2.69349400  |
| C | 0.23798500  | 4.95846800  | 1.82398300  |
| C | 0.38733600  | 3.82441800  | 3.99904000  |
| C | -0.89259800 | 5.63219600  | 2.26190400  |
| H | 0.64297100  | 5.12633100  | 0.83139200  |
| C | -0.75401000 | 4.49674200  | 4.41604800  |
| H | 0.89187100  | 3.12998400  | 4.66021600  |
| C | -1.38609700 | 5.40077900  | 3.55460200  |
| H | -1.39205500 | 6.33886300  | 1.60672700  |
| H | -1.14705300 | 4.31990900  | 5.41056300  |
| H | -2.27038300 | 5.93255300  | 3.89377100  |
| C | 1.33753600  | 0.37672600  | -0.53799200 |
| H | 0.53597400  | 1.10455800  | -0.71281600 |
| H | 0.90894600  | -0.61229300 | -0.74551300 |
| C | 2.53853700  | 0.65214300  | -1.45588000 |
| H | 3.34082000  | -0.08044700 | -1.30667500 |
| H | 2.24770200  | 0.60528500  | -2.51260100 |
| H | 2.96277100  | 1.64777000  | -1.27846000 |
| C | 0.70906400  | 0.11874400  | 4.40086000  |
| H | -0.13130300 | 0.13679000  | 5.10418900  |
| H | 1.20286300  | -0.85436500 | 4.50165300  |
| H | 1.42280400  | 0.87626200  | 4.73978200  |
| C | 0.22894900  | 0.36238900  | 2.95992700  |
| H | -0.45506400 | -0.43353200 | 2.63947500  |
| H | -0.33865400 | 1.29751100  | 2.88753500  |
| H | 3.88021000  | 2.48280300  | 1.69255300  |
| H | 3.57614200  | 4.85117000  | 2.97035500  |
| C | 2.54724400  | 5.79937200  | 5.67058400  |

|   |             |             |             |    |             |             |             |
|---|-------------|-------------|-------------|----|-------------|-------------|-------------|
| H | 1.73017600  | 5.13860400  | 5.96936700  | C  | 6.51801000  | 0.81391200  | 7.70962100  |
| H | 2.99316000  | 6.17070200  | 6.59702400  | C  | 5.87725100  | -0.30371100 | 8.23554900  |
| C | 2.02669500  | 6.96166700  | 4.81465800  | F  | 6.44264100  | -1.52072600 | 8.13980100  |
| H | 1.25545800  | 7.53469400  | 5.34744200  | F  | 7.70883800  | 0.67570100  | 7.09273200  |
| H | 2.82952700  | 7.66432200  | 4.55808200  | F  | 6.57384100  | 3.10391700  | 7.26395200  |
| H | 1.58786800  | 6.61613200  | 3.87156200  | F  | 2.87925600  | 1.19149900  | 9.57957700  |
| C | 4.32987600  | 2.53662800  | 4.79445100  | F  | 4.02053200  | -1.22017100 | 9.38011800  |
| H | 3.44131500  | 2.06785400  | 4.35988000  | F  | 2.41170700  | 5.39001600  | 10.45041400 |
| H | 4.34061700  | 2.24989200  | 5.84429500  | F  | -0.23946400 | 5.52788900  | 10.54314100 |
| C | 6.02109900  | 5.67341300  | 4.77302100  | F  | -1.78785700 | 4.08951900  | 8.79037300  |
| H | 5.83925500  | 6.71469300  | 5.06272300  | F  | -0.56784900 | 2.48391600  | 6.92712300  |
| H | 6.56750100  | 5.21651500  | 5.60510800  | F  | 2.09060400  | 2.34871100  | 6.79004700  |
| C | 5.60667100  | 2.03985200  | 4.10200300  | F  | 4.76342500  | 3.17894300  | 11.19783600 |
| H | 6.50112300  | 2.45253300  | 4.58001400  | F  | 6.30517000  | 4.69503400  | 12.80368300 |
| H | 5.69430600  | 0.94571600  | 4.15163900  | F  | 7.26521200  | 7.10362700  | 11.92248600 |
| H | 5.65466500  | 2.32268600  | 3.04030100  | F  | 6.65726800  | 7.96212500  | 9.39277400  |
| C | 6.83986500  | 5.60638900  | 3.47564700  | F  | 5.13414200  | 6.46471200  | 7.77664300  |
| H | 7.07009300  | 4.57222600  | 3.19238000  | H  | 4.21499400  | 4.19402100  | 7.27490700  |
| H | 6.30598500  | 6.06498700  | 2.63396600  | Sn | 4.10999100  | 4.68738900  | 4.67895800  |
| H | 7.79799300  | 6.13268000  | 3.58292900  | Sn | 1.84331200  | 0.44022600  | 1.54986000  |
| C | 3.52571900  | -0.76541800 | 2.12414000  |    |             |             |             |
| H | 4.35754200  | -0.54119600 | 1.44609800  |    |             |             |             |
| H | 3.83513200  | -0.43572500 | 3.12208800  |    |             |             |             |
| C | 3.20567500  | -2.26937500 | 2.11970600  |    |             |             |             |
| H | 4.07927100  | -2.85413900 | 2.43292800  |    |             |             |             |
| H | 2.38969100  | -2.51483000 | 2.80997100  |    |             |             |             |
| H | 2.91714700  | -2.62525400 | 1.12292200  |    |             |             |             |
| B | 4.03579700  | 3.78063100  | 8.40401400  |    |             |             |             |
| C | 4.90167600  | 4.72978400  | 9.40207700  |    |             |             |             |
| C | 5.40760500  | 5.96718300  | 9.01192200  |    |             |             |             |
| C | 5.23531600  | 4.34779800  | 10.70188500 |    |             |             |             |
| C | 6.19491800  | 6.77409100  | 9.83027100  |    |             |             |             |
| C | 6.01847400  | 5.11593200  | 11.55750400 | C  | 2.89545500  | 2.96806700  | 2.58397800  |
| C | 6.50588000  | 6.34293300  | 11.11514400 | C  | 3.75692600  | 2.58901500  | 1.72928300  |
| C | 2.41469700  | 3.84548500  | 8.62327600  | C  | 1.77282100  | 3.39762700  | 3.29495500  |
| C | 1.73736800  | 4.63876500  | 9.55225700  | C  | 1.16581200  | 4.63049000  | 2.94263200  |
| C | 1.56602600  | 3.14247700  | 7.76672600  | C  | 1.21462000  | 2.60189600  | 4.32754900  |
| C | 0.34522800  | 4.73385900  | 9.62886300  | C  | 0.02413700  | 5.04821100  | 3.61153200  |
| C | 0.18061300  | 3.19476400  | 7.80848700  | H  | 1.60872700  | 5.23564800  | 2.15924000  |
| C | -0.44488700 | 4.00782900  | 8.74694200  | C  | 0.08910900  | 3.04625500  | 5.00259900  |
| C | 4.66082600  | 2.27078700  | 8.41387400  | H  | 1.69383200  | 1.66609500  | 4.59054900  |
| C | 4.07301200  | 1.12309800  | 8.94409800  | C  | -0.50434800 | 4.26678800  | 4.64750400  |
| C | 5.90441800  | 2.05781600  | 7.81457200  | H  | -0.44209200 | 5.99302200  | 3.35110700  |
| C | 4.64572300  | -0.14528800 | 8.86215500  | H  | -0.32209700 | 2.46278700  | 5.81943500  |

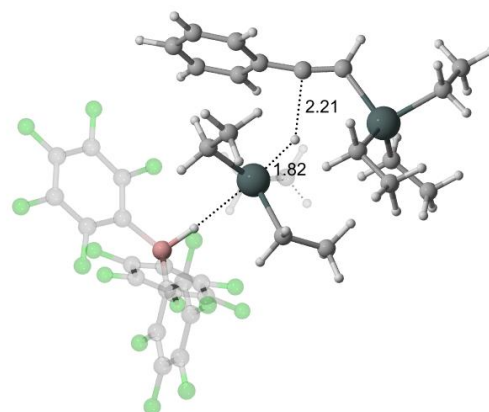

**TS6'**



|   |             |             |             |    |             |             |             |
|---|-------------|-------------|-------------|----|-------------|-------------|-------------|
| H | -1.37213100 | 4.61660100  | 5.19693000  | H  | 8.54577400  | 1.46460700  | 3.62398600  |
| C | 6.50343000  | 4.70515400  | 2.61033100  | B  | 3.79012900  | 4.99031700  | 9.43023700  |
| H | 6.12737400  | 4.88938300  | 3.61729900  | C  | 5.05023600  | 5.94415300  | 9.82778900  |
| H | 5.97463500  | 5.39468200  | 1.94086700  | C  | 5.59294500  | 6.82924800  | 8.89659100  |
| C | 8.02185700  | 4.93982600  | 2.54142900  | C  | 5.69125800  | 5.95221300  | 11.06747000 |
| H | 8.42171900  | 4.76831800  | 1.53469100  | C  | 6.69350100  | 7.64393200  | 9.13866100  |
| H | 8.26546600  | 5.97325300  | 2.81716800  | C  | 6.79626300  | 6.74948300  | 11.36072400 |
| H | 8.56583800  | 4.28654200  | 3.23342300  | C  | 7.30718000  | 7.60037900  | 10.38618400 |
| C | 6.19287000  | 0.93620800  | -0.51994100 | C  | 2.36790100  | 5.78363300  | 9.33336600  |
| H | 6.54507000  | 0.76576100  | -1.54524200 | C  | 2.09193000  | 7.04033700  | 9.87360000  |
| H | 6.60183000  | 0.13171300  | 0.10296600  | C  | 1.30863900  | 5.22681300  | 8.61585300  |
| H | 5.10182100  | 0.81241800  | -0.53339000 | C  | 0.87846300  | 7.70801300  | 9.70001900  |
| C | 6.60812600  | 2.32194400  | -0.00273400 | C  | 0.08466500  | 5.84995300  | 8.41521300  |
| H | 7.70131200  | 2.42162000  | -0.02474300 | C  | -0.13495400 | 7.11108100  | 8.95894900  |
| H | 6.21878800  | 3.11378500  | -0.65542800 | C  | 3.73190400  | 3.62191200  | 10.31110800 |
| H | 3.44917500  | 2.14638100  | 0.77993700  | C  | 2.73643000  | 3.26993000  | 11.22184600 |
| H | 4.28696500  | 3.33114800  | 4.26343400  | C  | 4.73887500  | 2.66660100  | 10.16213400 |
| C | 3.01711300  | 5.60437000  | 5.70718500  | C  | 2.72110500  | 2.06283500  | 11.91974300 |
| H | 1.99430600  | 5.27320000  | 5.51322000  | C  | 4.77017800  | 1.45041200  | 10.83489500 |
| H | 2.99570300  | 6.15677700  | 6.64750600  | C  | 3.74416300  | 1.14170400  | 11.72294700 |
| C | 3.53313800  | 6.50403900  | 4.57764300  | F  | 3.74343600  | -0.03009100 | 12.38107900 |
| H | 2.85052200  | 7.34454700  | 4.38972300  | F  | 5.76810200  | 0.56861900  | 10.62858700 |
| H | 4.50992500  | 6.93381600  | 4.82826500  | F  | 5.77190600  | 2.90639300  | 9.30952700  |
| H | 3.65021700  | 5.95887200  | 3.63196400  | F  | 1.71524600  | 4.11836100  | 11.49121000 |
| C | 3.48906700  | 2.05293300  | 6.87220300  | F  | 1.72711100  | 1.77817000  | 12.78118700 |
| H | 2.39793500  | 2.08342000  | 6.80792200  | F  | 3.01206000  | 7.68691900  | 10.62432300 |
| H | 3.72032400  | 2.08891700  | 7.93849700  | F  | 0.67795400  | 8.92306500  | 10.24049100 |
| C | 6.32685400  | 4.32874300  | 6.42239400  | F  | -1.30958000 | 7.73789300  | 8.77111600  |
| H | 6.57544500  | 5.26304600  | 5.90462200  | F  | -0.89015800 | 5.25089300  | 7.69060700  |
| H | 6.36660300  | 4.54985400  | 7.49184500  | F  | 1.44715900  | 3.99412400  | 8.05655100  |
| C | 4.04233600  | 0.76798400  | 6.24545100  | F  | 5.23917400  | 5.17596900  | 12.08033200 |
| H | 5.12713100  | 0.68723800  | 6.38246900  | F  | 7.37366500  | 6.70749000  | 12.57515600 |
| H | 3.59528500  | -0.12488500 | 6.70302900  | F  | 8.37506600  | 8.37334400  | 10.64672700 |
| H | 3.84969900  | 0.71584700  | 5.16548600  | F  | 7.17001900  | 8.46678900  | 8.18301100  |
| C | 7.33876400  | 3.23092300  | 6.07708900  | F  | 5.02871200  | 6.94367000  | 7.66363200  |
| H | 7.11839200  | 2.29541500  | 6.60426500  | H  | 4.01708300  | 4.61349700  | 8.28609400  |
| H | 7.35184100  | 3.01035900  | 5.00440700  | Sn | 4.26126800  | 3.87363800  | 6.00342000  |
| H | 8.35785300  | 3.52746800  | 6.35935900  | Sn | 5.96278100  | 2.71477600  | 2.01791800  |
| C | 6.43626700  | 1.00428500  | 3.22630800  |    |             |             |             |
| H | 6.09522900  | 1.17845400  | 4.24787200  |    |             |             |             |
| H | 5.84320800  | 0.17016500  | 2.83149900  |    |             |             |             |
| C | 7.93506900  | 0.66314200  | 3.19264700  |    |             |             |             |
| H | 8.14011400  | -0.24510400 | 3.77293600  |    |             |             |             |
| H | 8.29377600  | 0.48519700  | 2.17143800  |    |             |             |             |

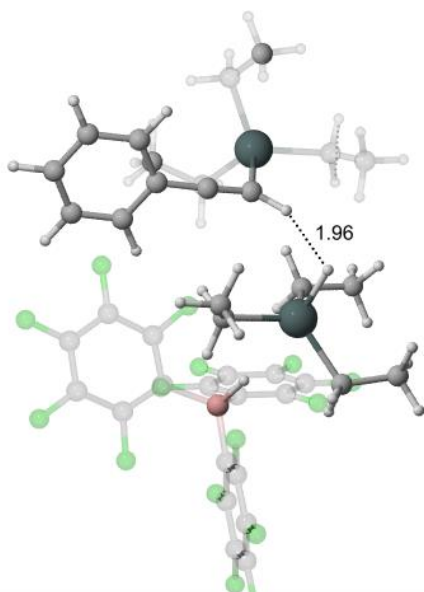

8''

|   |             |             |            |   |             |             |             |
|---|-------------|-------------|------------|---|-------------|-------------|-------------|
| C | -0.66990200 | -1.94691800 | 3.78170800 | H | -0.36230400 | -3.85846800 | 0.41669900  |
| C | 0.09979900  | -2.63693200 | 3.08630600 | C | -1.85616500 | -1.18874000 | 0.60113300  |
| C | -1.40068800 | -1.08462800 | 4.60665500 | H | -1.28992300 | -0.63765000 | 1.35892900  |
| C | -1.77001600 | 0.19294200  | 4.12017300 | H | -2.27061600 | -0.44019000 | -0.07622500 |
| C | -1.76031900 | -1.48086500 | 5.91894100 | C | -2.98213200 | -2.01198600 | 1.23866200  |
| C | -2.47444400 | 1.06392300  | 4.94011400 | H | -3.65021900 | -1.38544400 | 1.84698400  |
| H | -1.49597300 | 0.47705700  | 3.11299900 | H | -3.60295400 | -2.48998300 | 0.47165400  |
| C | -2.46709400 | -0.60029000 | 6.72583900 | H | -2.60340300 | -2.81394000 | 1.88557100  |
| H | -1.47510600 | -2.46512400 | 6.27639900 | C | 1.61772300  | -1.65540300 | -0.27856900 |
| C | -2.82081200 | 0.66720600  | 6.23781500 | H | 1.82605800  | -1.64881300 | 0.80045600  |
| H | -2.74638700 | 2.04805300  | 4.57218200 | H | 1.66503100  | -0.61180900 | -0.59547100 |
| H | -2.74622200 | -0.89182400 | 7.73345500 | C | -0.98619700 | -2.92240500 | -2.50811300 |
| H | -3.37167600 | 1.35119700  | 6.87708800 | H | -2.06541300 | -3.11543900 | -2.49428500 |
| C | 2.39579700  | 0.07122400  | 3.27756300 | H | -0.83181600 | -2.05158200 | -3.15101200 |
| H | 1.72800400  | 0.29541600  | 2.44146800 | C | 2.66984200  | -2.49268700 | -1.01824500 |
| H | 3.41316300  | 0.25918000  | 2.91164900 | H | 2.52192200  | -2.43993800 | -2.10120800 |
| C | 2.07656700  | 0.95823000  | 4.49109800 | H | 3.68887100  | -2.13171900 | -0.81870000 |
| H | 2.75483700  | 0.76763300  | 5.33142800 | H | 2.63340100  | -3.55201800 | -0.73364500 |
| H | 2.16680400  | 2.01686400  | 4.22285700 | C | -0.22154400 | -4.14039000 | -3.04601800 |
| H | 1.05241000  | 0.80603400  | 4.84892100 | H | 0.85374600  | -3.94145300 | -3.12052000 |
| C | 2.63430300  | -4.71975900 | 2.14519700 | H | -0.35076600 | -5.02093600 | -2.40414600 |
| H | 3.31090600  | -5.41449100 | 1.63277500 | H | -0.57054200 | -4.41289900 | -4.05105900 |
| H | 2.22188200  | -5.24512600 | 3.01473800 | C | 2.18207200  | -2.47179000 | 5.79790100  |
| H | 1.81076300  | -4.50982700 | 1.45557100 | H | 3.16177700  | -2.21994500 | 6.22475700  |
| C | 3.38404500  | -3.44129900 | 2.54200000 | H | 1.46482100  | -1.78116700 | 6.25893600  |
| H | 4.25600700  | -3.68281700 | 3.16467800 | C | 1.81743100  | -3.93116300 | 6.11127700  |
| H | 3.75535600  | -2.92011700 | 1.65428800 | H | 1.78268300  | -4.10903700 | 7.19342300  |
| H | 0.04305900  | -3.34778200 | 2.26007600 | H | 0.83614100  | -4.20091200 | 5.70243700  |
|   |             |             |            | H | 2.54860600  | -4.63163700 | 5.69086200  |
|   |             |             |            | B | -0.51210300 | 1.21942500  | -2.00075800 |
|   |             |             |            | C | -1.45027000 | 1.23724300  | -3.33085000 |
|   |             |             |            | C | -2.56729100 | 0.40795200  | -3.42948700 |
|   |             |             |            | C | -1.21752600 | 2.02722200  | -4.45660600 |
|   |             |             |            | C | -3.38550000 | 0.33134100  | -4.55135000 |
|   |             |             |            | C | -2.00632600 | 1.98753200  | -5.60493600 |
|   |             |             |            | C | -3.09859000 | 1.12792400  | -5.65556100 |
|   |             |             |            | C | -1.09353400 | 2.10015900  | -0.74916100 |
|   |             |             |            | C | -2.23439800 | 2.90482500  | -0.75314800 |
|   |             |             |            | C | -0.46461300 | 2.02055600  | 0.49398900  |
|   |             |             |            | C | -2.72906500 | 3.55908700  | 0.37884400  |
|   |             |             |            | C | -0.89948200 | 2.67192600  | 1.63895300  |
|   |             |             |            | C | -2.05810400 | 3.43928400  | 1.58867500  |
|   |             |             |            | C | 1.05139100  | 1.52965800  | -2.34836400 |
|   |             |             |            | C | 1.76257600  | 2.68113300  | -2.01412400 |

|    |             |             |             |    |             |             |             |
|----|-------------|-------------|-------------|----|-------------|-------------|-------------|
| C  | 1.80409100  | 0.56243700  | -3.01560600 | C  | -3.30780500 | -1.22034400 | 1.76501400  |
| C  | 3.11823700  | 2.85810300  | -2.28332500 | H  | -2.08764300 | -0.59121300 | 0.09923900  |
| C  | 3.15759400  | 0.69130200  | -3.31003300 | C  | -3.31991400 | -1.81210500 | 3.03236100  |
| C  | 3.82551400  | 1.85218200  | -2.93348800 | H  | -2.13025600 | -2.68340400 | 4.60916700  |
| F  | 5.13606700  | 2.00050100  | -3.19712600 | H  | -4.23554300 | -0.88120000 | 1.31349800  |
| F  | 3.82752600  | -0.29326100 | -3.94165500 | H  | -4.25793300 | -1.93075400 | 3.56662800  |
| F  | 1.21311800  | -0.59461600 | -3.41357900 | Sn | 3.18106500  | -1.57193900 | -0.67612300 |
| F  | 1.14200400  | 3.71726700  | -1.39762100 | C  | 3.42614600  | -3.67281600 | -0.27764800 |
| F  | 3.75249200  | 3.99000100  | -1.92122600 | C  | 3.51648400  | -3.99417200 | 1.22246000  |
| F  | -2.94461800 | 3.09899600  | -1.88569900 | H  | 4.32760900  | -4.01725000 | -0.80104000 |
| F  | -3.84861900 | 4.30109200  | 0.31151600  | H  | 2.57881100  | -4.19958100 | -0.73377800 |
| F  | -2.51828500 | 4.04682300  | 2.70226900  | H  | 3.61739500  | -5.07356800 | 1.39569000  |
| F  | -0.22161900 | 2.55657000  | 2.80866000  | H  | 4.38110000  | -3.50698200 | 1.68951200  |
| F  | 0.65608700  | 1.26084000  | 0.63633700  | H  | 2.62096100  | -3.65707300 | 1.75783900  |
| F  | -0.19198000 | 2.91253900  | -4.47138700 | C  | 4.76769300  | -0.38469400 | 0.16295400  |
| F  | -1.72702400 | 2.77208500  | -6.66247300 | C  | 4.60442500  | -0.04614200 | 1.65309900  |
| F  | -3.87135600 | 1.07159900  | -6.75392500 | H  | 4.84865200  | 0.53120000  | -0.43177900 |
| F  | -4.44830300 | -0.49683200 | -4.58009300 | H  | 5.70000200  | -0.94135200 | -0.00038800 |
| F  | -2.92916800 | -0.36958200 | -2.37400100 | H  | 5.44672200  | 0.55863500  | 2.01425300  |
| H  | -0.52176000 | 0.07328500  | -1.59629800 | H  | 3.68835400  | 0.51940800  | 1.84395900  |
| Sn | -0.41634300 | -2.34286200 | -0.52030600 | H  | 4.55926600  | -0.94854100 | 2.27413500  |
| Sn | 2.25027000  | -2.02224900 | 3.69816100  | C  | 2.77078200  | -1.07674600 | -2.73055100 |

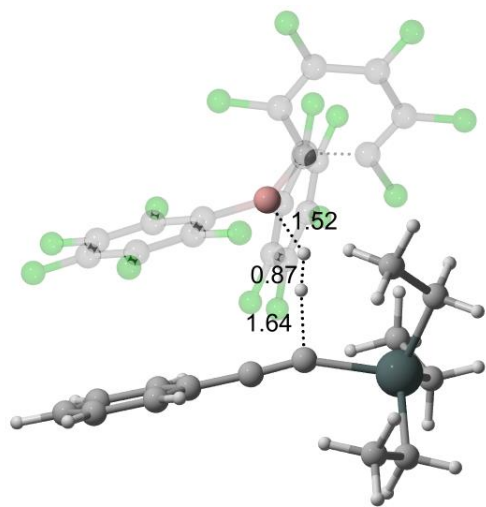

**TS2''**

|   |             |             |            |   |             |            |             |
|---|-------------|-------------|------------|---|-------------|------------|-------------|
| C | 0.33634800  | -1.29560600 | 0.98474300 | C | -0.36904900 | 2.40033500 | -1.38289700 |
| H | 1.57482400  | 1.41655600  | 0.35836300 | C | 0.79219000  | 4.44190700 | -1.18761900 |
| C | 1.39941000  | -1.07795700 | 0.39724900 | C | -0.82382600 | 2.74314200 | -2.64842000 |
| C | -0.89638700 | -1.47436500 | 1.66826600 | C | 0.34959300  | 4.83237900 | -2.45007600 |
| C | -0.91593300 | -2.06721800 | 2.94784200 | C | -0.45831600 | 3.97394700 | -3.18920900 |
| C | -2.10701000 | -1.05475100 | 1.07910700 | C | -0.04078800 | 2.25166900 | 1.92020800  |
| C | -2.12341300 | -2.23677300 | 3.61945500 | C | 0.37804900  | 1.46332400 | 2.99841700  |
| H | 0.01909400  | -2.37518500 | 3.40469400 | C | -1.40844500 | 2.54266000 | 1.90126300  |

|   |             |            |             |   |             |             |             |
|---|-------------|------------|-------------|---|-------------|-------------|-------------|
| C | -0.47440900 | 0.99350900 | 3.98822200  | H | -1.47135300 | 5.30305200  | 4.77286500  |
| C | -2.29890000 | 2.08120200 | 2.86650400  | C | 5.87962800  | 4.50924700  | 1.91737600  |
| C | -1.82906300 | 1.30253800 | 3.91898300  | H | 5.44825200  | 4.79830500  | 0.95325000  |
| B | 0.99695900  | 2.74092100 | 0.81721500  | H | 6.96316800  | 4.66112900  | 1.83281800  |
| F | -0.75904300 | 1.19822300 | -0.90090000 | C | 5.29447500  | 5.36961100  | 3.04739400  |
| F | -1.60425100 | 1.90614300 | -3.35038900 | H | 5.76166400  | 5.14696600  | 4.01415900  |
| F | -0.88508900 | 4.32793700 | -4.40677200 | H | 5.44234400  | 6.43684500  | 2.84382800  |
| F | 0.69496300  | 6.02483300 | -2.95768600 | H | 4.21521800  | 5.21381900  | 3.15922900  |
| F | 1.55905200  | 5.33139500 | -0.52263900 | C | 5.72259600  | -0.24275500 | 0.59859800  |
| F | 3.46046900  | 2.59732200 | -0.68720600 | H | 6.30245800  | -0.92175700 | -0.03934300 |
| F | 5.86628200  | 3.49090500 | 0.11563400  | H | 5.44934200  | -0.79734600 | 1.50387100  |
| F | 6.12683100  | 4.76524800 | 2.52500900  | H | 4.79591800  | -0.00563900 | 0.06603400  |
| F | 3.93371000  | 5.12209700 | 4.11679900  | C | 6.53020100  | 1.02408400  | 0.92377900  |
| F | 1.53046800  | 4.21818500 | 3.34355200  | H | 7.46894400  | 0.76133400  | 1.42914600  |
| F | 1.67869500  | 1.11577100 | 3.10987000  | H | 6.80787300  | 1.54976400  | 0.00464700  |
| F | -1.93635700 | 3.31390100 | 0.92757300  | H | 3.20514600  | 1.77827800  | 0.49954800  |
| F | -3.60573600 | 2.37724400 | 2.79082500  | H | 2.99660600  | 1.45186100  | -0.57831600 |
| F | -2.67253400 | 0.85734900 | 4.85657500  | C | 1.29138000  | 3.78299400  | -0.72485900 |
| F | -0.00880300 | 0.24016900 | 4.99705500  | H | 1.77135900  | 4.27872400  | 0.12195300  |

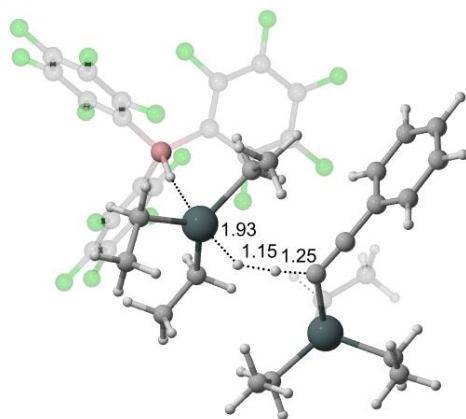

**TS6''**

|   |             |            |            |   |            |             |             |
|---|-------------|------------|------------|---|------------|-------------|-------------|
| C | 2.46624200  | 2.79259200 | 2.30134400 | H | 6.85038300 | 2.42087800  | -2.45326100 |
| C | 3.37669500  | 2.24547900 | 1.64647500 | H | 5.61845000 | 1.18631100  | -2.15513800 |
| C | 1.43512000  | 3.45522600 | 2.98938100 | C | 2.73858000 | 0.23052900  | -3.63455500 |
| C | 1.25652900  | 4.84655400 | 2.80117700 | H | 3.82677000 | 0.25604400  | -3.75802400 |
| C | 0.55839800  | 2.74139100 | 3.83890200 | H | 2.52358500 | -0.34597000 | -2.72687100 |
| C | 0.21511400  | 5.50389000 | 3.44494200 | H | 2.32744700 | -0.32889600 | -4.48519600 |
| H | 1.93865800  | 5.39194100 | 2.16083300 | C | 5.48892300 | 1.83344700  | 4.27530900  |
| C | -0.48117000 | 3.41059900 | 4.47393600 | H | 6.50902200 | 1.93768500  | 4.66748400  |
| H | 0.70184300  | 1.67422700 | 3.97500800 | H | 4.87528500 | 2.56867300  | 4.81071500  |
| C | -0.65459400 | 4.78724800 | 4.27608900 | C | 4.96136900 | 0.41059600  | 4.51715000  |
| H | 0.07921600  | 6.57068900 | 3.29488800 | H | 4.93557200 | 0.17174600  | 5.58805100  |
| H | -1.16089900 | 2.86457500 | 5.12095600 | H | 3.94353600 | 0.28745600  | 4.12807500  |

|    |             |             |             |
|----|-------------|-------------|-------------|
| H  | 5.59162200  | -0.34346800 | 4.03095400  |
| B  | 2.64345900  | 5.83969200  | -3.55773900 |
| C  | 1.63238900  | 5.76266500  | -4.82592100 |
| C  | 0.53214300  | 4.90715600  | -4.82677000 |
| C  | 1.78524600  | 6.51087700  | -5.99357600 |
| C  | -0.34603400 | 4.76662200  | -5.89570700 |
| C  | 0.93320400  | 6.40809400  | -7.09125400 |
| C  | -0.14019200 | 5.52400800  | -7.04472500 |
| C  | 2.11675100  | 6.75106800  | -2.31102800 |
| C  | 0.96704100  | 7.54357900  | -2.30432000 |
| C  | 2.77642100  | 6.69935900  | -1.08197200 |
| C  | 0.48617400  | 8.20207600  | -1.16972100 |
| C  | 2.34440200  | 7.34141300  | 0.06862000  |
| C  | 1.17489000  | 8.09260000  | 0.03189400  |
| C  | 4.17819700  | 6.11793800  | -4.00952900 |
| C  | 4.91410400  | 7.27421400  | -3.75542500 |
| C  | 4.87204200  | 5.13011100  | -4.70888600 |
| C  | 6.24400800  | 7.43840900  | -4.13842700 |
| C  | 6.19748600  | 5.24517200  | -5.11288100 |
| C  | 6.89406500  | 6.41382400  | -4.81929700 |
| F  | 8.17714400  | 6.55125400  | -5.19132700 |
| F  | 6.81264900  | 4.24262300  | -5.76789700 |
| F  | 4.24583200  | 3.96344500  | -5.01807400 |
| F  | 4.34495400  | 8.32346600  | -3.11682600 |
| F  | 6.90608100  | 8.57519400  | -3.85823100 |
| F  | 0.23337400  | 7.71361900  | -3.42547700 |
| F  | -0.64012200 | 8.93301500  | -1.22567600 |
| F  | 0.72115800  | 8.69642000  | 1.14573200  |
| F  | 3.02557400  | 7.21426400  | 1.23174100  |
| F  | 3.90443200  | 5.95072200  | -0.95224800 |
| F  | 2.78722900  | 7.41471600  | -6.09898600 |
| F  | 1.13366200  | 7.15412500  | -8.19171500 |
| F  | -0.97126800 | 5.40720200  | -8.09263600 |
| F  | -1.38690100 | 3.91515900  | -5.82967500 |
| F  | 0.25255800  | 4.16442800  | -3.72133900 |
| H  | 2.66711600  | 4.68506900  | -3.10141500 |
| Sn | 2.81617300  | 2.83153200  | -1.91219700 |
| Sn | 5.50591200  | 2.41233600  | 2.20455400  |

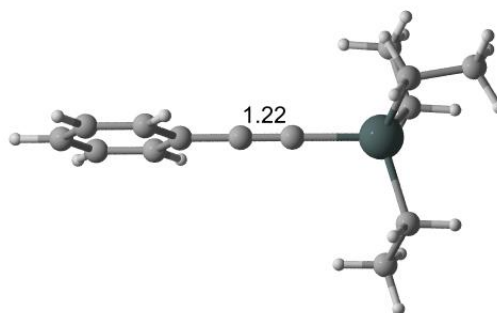

### P3

|    |             |             |             |
|----|-------------|-------------|-------------|
| C  | -0.72166800 | 1.13419800  | -0.02068000 |
| C  | -2.14911100 | 1.15838800  | -0.05987500 |
| C  | -2.82829400 | 1.32762200  | -1.28289200 |
| C  | -2.90069900 | 1.01373300  | 1.12325100  |
| C  | -4.22162700 | 1.35082900  | -1.31770200 |
| H  | -2.25143000 | 1.43948900  | -2.19582000 |
| C  | -4.29381800 | 1.03786700  | 1.08020300  |
| H  | -2.37971800 | 0.88345000  | 2.06679300  |
| C  | -4.95932400 | 1.20626000  | -0.13831600 |
| H  | -4.73344500 | 1.48205100  | -2.26729300 |
| H  | -4.86196700 | 0.92513100  | 1.99965600  |
| H  | -6.04527900 | 1.22469600  | -0.16861000 |
| C  | 0.50132200  | 1.11342800  | 0.01220600  |
| Sn | 2.59522800  | 1.07868800  | 0.04613800  |
| C  | 3.19664900  | -0.95164400 | -0.34823900 |
| H  | 2.85303300  | -1.57123100 | 0.48979100  |
| H  | 4.29355700  | -0.99681300 | -0.34016000 |
| C  | 3.25448700  | 1.78040200  | 1.97253600  |
| H  | 2.71972600  | 2.71354800  | 2.18881700  |
| H  | 2.93330900  | 1.05732200  | 2.73259700  |
| C  | 3.25760300  | 2.43073900  | -1.49374900 |
| H  | 4.35222900  | 2.37504300  | -1.55756500 |
| H  | 2.87116000  | 2.06642200  | -2.45377000 |
| C  | 2.80389100  | 3.87848500  | -1.24749100 |
| H  | 3.13693900  | 4.55000400  | -2.05029600 |
| H  | 1.71099500  | 3.94995100  | -1.19052100 |
| H  | 3.20643300  | 4.27293200  | -0.30579100 |
| C  | 2.64366900  | -1.49262900 | -1.67653200 |
| H  | 3.00445000  | -0.90771500 | -2.53204100 |
| H  | 2.94482200  | -2.53533200 | -1.84486600 |
| H  | 1.54778200  | -1.45869500 | -1.69549800 |
| C  | 4.77419600  | 2.00092100  | 2.04374500  |
| H  | 5.08495800  | 2.36857300  | 3.03075200  |
| H  | 5.32867900  | 1.07252400  | 1.85546100  |

H 5. 11088900 2. 73731000 1. 30292700

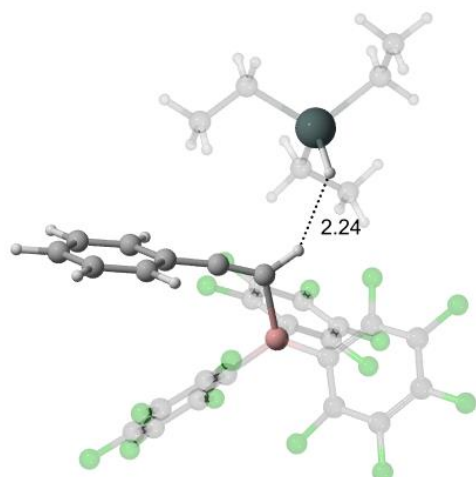

6''

C 2. 51034000 -2. 97065200 2. 24970900  
 C 1. 36778300 -2. 39669300 1. 71106200  
 C 1. 13986500 -1. 00484500 1. 86771200  
 C 2. 08190000 -0. 20535200 2. 56427200  
 C 3. 21903800 -0. 79517600 3. 09798400  
 C 3. 43083100 -2. 17220800 2. 94262000  
 H 2. 68429500 -4. 03669800 2. 14357500  
 H 0. 63264300 -2. 99496200 1. 18510300  
 H 1. 89143400 0. 85480100 2. 67958500  
 H 3. 94074800 -0. 19129700 3. 63905200  
 H 4. 32045400 -2. 62808800 3. 36830300  
 C -0. 01944400 -0. 43187300 1. 34883800  
 C -1. 13467900 0. 03690000 1. 01908100  
 H -1. 45625500 0. 46357400 0. 07793200  
 B -2. 42451900 0. 08560500 2. 28458400  
 C -3. 71897700 -0. 51498800 1. 49929500  
 C -4. 56943800 -1. 49856200 2. 01829500  
 C -4. 09893200 -0. 05170400 0. 23339700  
 C -5. 67113200 -2. 00863200 1. 33333000  
 C -5. 18218300 -0. 53318100 -0. 49006600  
 C -5. 97777100 -1. 53103200 0. 06453300  
 C -2. 51212700 1. 68041000 2. 60439100  
 C -1. 38898400 2. 41338100 3. 00368800  
 C -3. 68717400 2. 43792300 2. 53496400  
 C -1. 39585200 3. 77344500 3. 28101900  
 C -3. 74422100 3. 80303200 2. 81285400  
 C -2. 58893600 4. 48125600 3. 18080500  
 C -1. 92188600 -0. 83437100 3. 53317100  
 C -1. 55653400 -2. 16982800 3. 33038100  
 C -1. 79350500 -0. 40460100 4. 85572900

C -1. 04805300 -3. 00259900 4. 31748400  
 C -1. 29472000 -1. 20722000 5. 88348100  
 C -0. 90679200 -2. 51328800 5. 61275500  
 F -0. 41075000 -3. 29373800 6. 58307600  
 F -1. 18331900 -0. 72411100 7. 13128900  
 F -2. 17072800 0. 83813700 5. 22883800  
 F -1. 70190600 -2. 72767000 2. 10114300  
 F -0. 68765900 -4. 26723200 4. 03297200  
 F -0. 19886000 1. 78653500 3. 18710400  
 F -0. 26719400 4. 40573300 3. 64516500  
 F -2. 62138800 5. 79586000 3. 43369600  
 F -4. 90573700 4. 46871400 2. 71988100  
 F -4. 87056200 1. 86846700 2. 21869300  
 F -3. 41306800 0. 96645300 -0. 35081100  
 F -5. 47670800 -0. 03445100 -1. 70136100  
 F -7. 03066600 -2. 01185100 -0. 60781000  
 F -6. 44163400 -2. 95478200 1. 89228100  
 F -4. 38546000 -1. 99907900 3. 25971600  
 C -0. 29691600 3. 49780000 -0. 40014200  
 H -0. 13959200 2. 88771800 0. 49718700  
 H 0. 47059300 4. 28304800 -0. 37298400  
 C -1. 69966100 4. 12562100 -0. 38378700  
 H -1. 83252500 4. 79086100 0. 47817400  
 H -1. 88552300 4. 72448800 -1. 28364700  
 H -2. 48366300 3. 36218900 -0. 33093200  
 C 2. 16976700 1. 69569400 -2. 16756700  
 H 2. 77865800 2. 60778700 -2. 22161800  
 H 2. 36550900 1. 13891400 -3. 09253800  
 C -0. 43816700 3. 34151000 -3. 94533600  
 H -1. 50112600 3. 60638700 -3. 88455200  
 H 0. 11498300 4. 29001400 -3. 95793100  
 C 2. 57555200 0. 85759200 -0. 94544300  
 H 2. 00660700 -0. 07881700 -0. 89462300  
 H 3. 64062700 0. 58862300 -0. 96530500  
 H 2. 39552900 1. 39803200 -0. 00789800  
 C -0. 16023600 2. 54329600 -5. 22945800  
 H 0. 90313800 2. 29107800 -5. 32767500  
 H -0. 72300200 1. 60170600 -5. 24808800  
 H -0. 44396200 3. 10963000 -6. 12651800  
 Sn 0. 09139600 2. 28563700 -2. 14292600  
 H -0. 85907400 0. 83595900 -2. 05030300

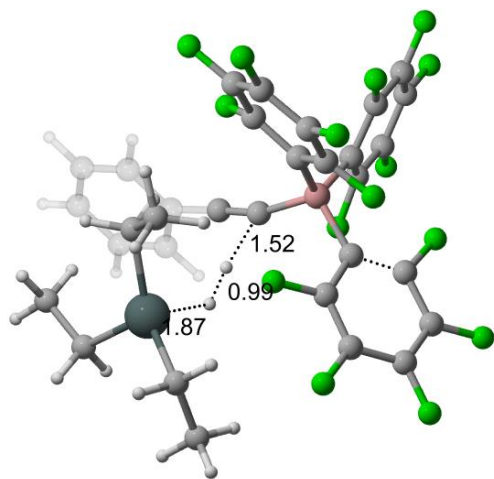

TS4''

|   |             |             |             |    |             |             |             |
|---|-------------|-------------|-------------|----|-------------|-------------|-------------|
| C | 3.57197000  | -1.79997600 | 1.07529600  | C  | -3.08178300 | -1.49299300 | 6.05657800  |
| C | 2.19292200  | -1.61691400 | 1.14140000  | C  | -2.62739300 | -2.79148400 | 5.86519900  |
| C | 1.66631000  | -0.50746700 | 1.83470700  | F  | -2.65159700 | -3.67768200 | 6.87167500  |
| C | 2.53772900  | 0.40525600  | 2.46746200  | F  | -3.55273600 | -1.12126700 | 7.25925900  |
| C | 3.91345300  | 0.19877100  | 2.41240000  | F  | -3.53128300 | 0.64741400  | 5.27776600  |
| C | 4.43080700  | -0.89828400 | 1.71408400  | F  | -1.71206200 | -2.67281200 | 2.37780800  |
| H | 3.97841100  | -2.65171800 | 0.53808700  | F  | -1.72855300 | -4.42235300 | 4.40074400  |
| H | 1.51231300  | -2.32165500 | 0.67408300  | F  | -0.41382800 | 1.69747400  | 3.98245900  |
| H | 2.11855700  | 1.24949700  | 3.00533000  | F  | -0.52987500 | 4.26168800  | 4.66500400  |
| H | 4.58373900  | 0.89427300  | 2.90859700  | F  | -2.78040500 | 5.74565000  | 4.16196800  |
| H | 5.50521000  | -1.05212000 | 1.66922200  | F  | -4.92143900 | 4.56000400  | 2.92867700  |
| C | 0.26610300  | -0.30671500 | 1.92023100  | F  | -4.83264000 | 2.00552900  | 2.20677300  |
| C | -0.94057300 | -0.04736300 | 1.92205100  | F  | -2.64508900 | 1.67642800  | 0.01426300  |
| H | -0.57448300 | 0.23703600  | 0.47108500  | F  | -4.23938800 | 1.22434000  | -2.08709100 |
| B | -2.45511200 | 0.15303500  | 2.46859600  | F  | -6.02688500 | -0.85739700 | -2.05154000 |
| C | -3.49518700 | -0.18593600 | 1.23576600  | F  | -6.18178400 | -2.45386600 | 0.16749100  |
| C | -4.44852500 | -1.20661000 | 1.21224800  | F  | -4.63156100 | -2.02503400 | 2.26957400  |
| C | -3.48094200 | 0.59597800  | 0.08074200  | C  | 0.35708900  | 3.29990600  | 0.46140300  |
| C | -5.29484500 | -1.44732200 | 0.12762700  | H  | 0.37163000  | 2.64636600  | 1.34073500  |
| C | -4.30544200 | 0.40516100  | -1.01923400 | H  | 1.34338800  | 3.77848800  | 0.41329900  |
| C | -5.22241300 | -0.64072600 | -1.00117600 | C  | -0.75782900 | 4.34926700  | 0.58858800  |
| C | -2.58187800 | 1.72144900  | 2.96535500  | H  | -0.59014200 | 4.98531000  | 1.46585500  |
| C | -1.54413500 | 2.36955500  | 3.64125900  | H  | -0.80453100 | 5.00687000  | -0.28761000 |
| C | -3.71527500 | 2.51644700  | 2.77467500  | H  | -1.73889100 | 3.88041900  | 0.70599400  |
| C | -1.58491400 | 3.70063800  | 4.04447500  | C  | 2.06038900  | 1.33176800  | -2.07976300 |
| C | -3.80357800 | 3.85177000  | 3.16230000  | H  | 2.22115800  | 1.90913500  | -3.00027400 |
| C | -2.72386800 | 4.45639200  | 3.79532100  | H  | 1.92171600  | 0.29004700  | -2.39282300 |
| C | -2.56242500 | -0.90031700 | 3.72691800  | C  | -1.22599300 | 2.51178500  | -2.78533600 |
| C | -2.13669900 | -2.22572300 | 3.58561100  | H  | -2.16519800 | 2.80007500  | -2.30685900 |
| C | -3.04473400 | -0.58414600 | 4.99793900  | H  | -0.83685400 | 3.40255600  | -3.29722900 |
| C | -2.15241900 | -3.16307600 | 4.61031700  | C  | 3.26373200  | 1.46014400  | -1.13697200 |
|   |             |             |             | H  | 3.12679300  | 0.87179200  | -0.22616500 |
|   |             |             |             | H  | 4.18336300  | 1.10522800  | -1.61975700 |
|   |             |             |             | H  | 3.43513300  | 2.49994800  | -0.83359700 |
|   |             |             |             | C  | -1.44713300 | 1.36757500  | -3.78692400 |
|   |             |             |             | H  | -0.51693000 | 1.07942200  | -4.29203300 |
|   |             |             |             | H  | -1.85232100 | 0.47568800  | -3.29658300 |
|   |             |             |             | H  | -2.16529400 | 1.66210200  | -4.56160200 |
|   |             |             |             | Sn | 0.19117200  | 2.01975900  | -1.25542000 |
|   |             |             |             | H  | -0.47639800 | 0.45184400  | -0.48977400 |

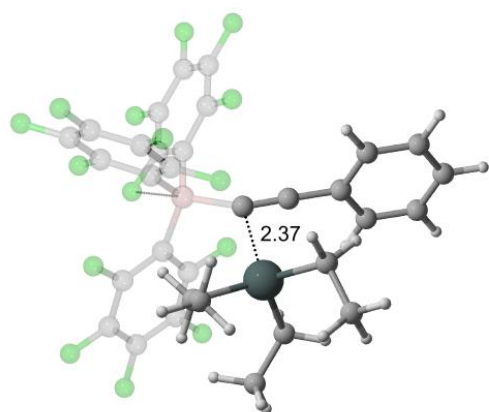

7"

|   |             |             |             |    |             |             |             |
|---|-------------|-------------|-------------|----|-------------|-------------|-------------|
| C | -0.06829400 | -0.39652700 | -1.60368800 | C  | -3.53024900 | -4.20676500 | -1.93527500 |
| C | 0.40066100  | -0.58595300 | -2.73314800 | C  | -3.42488200 | -3.00005400 | -2.61991300 |
| C | 0.95237800  | -0.77655000 | -4.02424500 | C  | -2.63552000 | -1.98514200 | -2.08965100 |
| C | 0.35075600  | -0.16225900 | -5.14276800 | C  | -2.12695500 | 0.37010000  | -0.02123400 |
| H | -0.53605100 | 0.44625700  | -4.99771900 | C  | -3.13654500 | 0.11376700  | 0.91242900  |
| C | 0.89594200  | -0.35196100 | -6.40898600 | C  | -4.15467200 | 1.00771600  | 1.22208500  |
| H | 0.43191200  | 0.11445700  | -7.27274600 | C  | -4.20049900 | 2.24015800  | 0.57384200  |
| C | 2.04031100  | -1.14283500 | -6.56773900 | C  | -3.22782000 | 2.54153500  | -0.37121200 |
| H | 2.46345600  | -1.28565600 | -7.55800800 | C  | -2.23028300 | 1.60896200  | -0.64900200 |
| C | 2.64027100  | -1.75567000 | -5.46128800 | C  | -0.00775900 | -1.18243000 | 0.87696500  |
| H | 3.52353500  | -2.37336500 | -5.59283200 | C  | 0.02983700  | -0.60281700 | 2.14682800  |
| C | 2.09951700  | -1.58062400 | -4.19078600 | C  | 0.96309500  | -0.94364900 | 3.12719200  |
| H | 2.54389400  | -2.05706200 | -3.32273000 | C  | 1.92529800  | -1.90865300 | 2.85807400  |
| B | -1.03812000 | -0.80707200 | -0.35331800 | C  | 1.93345200  | -2.51939400 | 1.60773600  |
| F | -1.46661900 | -3.55387900 | 0.94620700  | C  | 0.98379900  | -2.14840500 | 0.66441300  |
| F | -2.95096500 | -5.51730500 | -0.05545300 | Sn | 1.61680500  | 1.20671000  | -1.16757500 |
| F | -4.28352000 | -5.20201800 | -2.42505600 | C  | 1.83699000  | 2.49494700  | -2.86979600 |
| F | -4.08633500 | -2.82470300 | -3.77777100 | H  | 1.83810400  | 1.88388600  | -3.77790400 |
| F | -2.60196200 | -0.82794900 | -2.79908200 | C  | 3.35322200  | -0.02064200 | -0.82980700 |
| F | -3.13803700 | -1.06013800 | 1.57963900  | H  | 4.04171800  | 0.14117300  | -1.66867400 |
| F | -5.08654500 | 0.70159100  | 2.13803500  | C  | 0.93523200  | 2.27027800  | 0.57204600  |
| F | -5.16967300 | 3.12147600  | 0.85696700  | H  | 1.67167100  | 2.07609700  | 1.36071700  |
| F | -3.25394000 | 3.72492500  | -1.01072000 | H  | -0.00546000 | 1.83873900  | 0.91182000  |
| F | -1.32828300 | 1.99736000  | -1.59590800 | H  | 3.03850300  | -1.06778100 | -0.88092300 |
| F | -0.85187100 | 0.35689300  | 2.50893700  | H  | 0.95383100  | 3.14142600  | -2.92051500 |
| F | 0.94845100  | -0.33167400 | 4.32271700  | C  | 4.05286800  | 0.26687500  | 0.50801500  |
| F | 2.84033700  | -2.23623700 | 3.78059400  | H  | 4.92313000  | -0.38643100 | 0.64753600  |
| F | 2.86539900  | -3.44410000 | 1.31923800  | H  | 4.40938200  | 1.30258800  | 0.56984900  |
| F | 1.04893700  | -2.79784500 | -0.52395300 | H  | 3.38273600  | 0.10020300  | 1.35808200  |
| C | -1.91136200 | -2.09549900 | -0.89817000 | C  | 0.77426600  | 3.77662800  | 0.32241100  |
| C | -2.06729300 | -3.31770500 | -0.24072400 | H  | 0.03042400  | 3.98031200  | -0.45478700 |
| C | -2.84831000 | -4.36251200 | -0.73392800 | H  | 0.43827400  | 4.28014300  | 1.23773700  |
|   |             |             |             | H  | 1.71388300  | 4.25181800  | 0.01741000  |
|   |             |             |             | C  | 3.12583100  | 3.33205300  | -2.79073400 |
|   |             |             |             | H  | 3.23058700  | 3.97882600  | -3.67107200 |
|   |             |             |             | H  | 3.13979600  | 3.98483900  | -1.90968200 |
|   |             |             |             | H  | 4.02081200  | 2.69897000  | -2.74649400 |



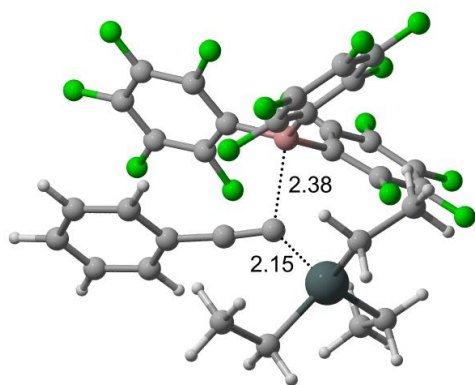

**TS5''**

|   |             |             |             |    |             |             |             |
|---|-------------|-------------|-------------|----|-------------|-------------|-------------|
| C | 1.38065300  | -2.90528100 | 2.60399100  | F  | -1.25889600 | 0.16512900  | 6.98093700  |
| C | 0.61447500  | -2.07687700 | 1.79035800  | F  | -2.19703500 | 1.81818500  | 5.13097400  |
| C | 0.46974000  | -0.71107000 | 2.11298200  | F  | -2.50335400 | -1.83439600 | 2.07913100  |
| C | 1.12160800  | -0.18853000 | 3.25108900  | F  | -1.62884400 | -3.47585800 | 3.98634500  |
| C | 1.87535400  | -1.02933400 | 4.06399900  | F  | -0.44972600 | 2.63918200  | 2.94500500  |
| C | 2.00244500  | -2.38623400 | 3.74534300  | F  | -0.34354900 | 5.27869100  | 3.20956500  |
| H | 1.47710100  | -3.95958800 | 2.36334700  | F  | -2.62233000 | 6.78784000  | 3.06529600  |
| H | 0.09774900  | -2.47212000 | 0.92214600  | F  | -5.02851900 | 5.55885900  | 2.62257100  |
| H | 1.00743500  | 0.86190800  | 3.49110200  | F  | -5.16573900 | 2.92486300  | 2.29823500  |
| H | 2.36067500  | -0.63035500 | 4.94992500  | F  | -3.63818100 | 2.15663000  | -0.27980000 |
| H | 2.58387500  | -3.04039600 | 4.38873200  | F  | -5.55047500 | 1.26102900  | -1.90034500 |
| C | -0.36673000 | 0.12465700  | 1.33432600  | F  | -7.20209600 | -0.77522400 | -1.09909000 |
| C | -1.14610500 | 0.87720000  | 0.73610500  | F  | -6.86877800 | -1.88259400 | 1.38002500  |
| B | -2.90801400 | 1.05282700  | 2.32665600  | F  | -4.95001800 | -1.03019000 | 3.00116500  |
| C | -4.09594700 | 0.53097500  | 1.39887700  | C  | 1.32877800  | 1.61350100  | -1.33399900 |
| C | -5.00511400 | -0.46698500 | 1.77736800  | H  | 1.43241100  | 0.52776400  | -1.45725900 |
| C | -4.36454100 | 1.09976000  | 0.14956600  | H  | 1.63196800  | 2.06483500  | -2.28866200 |
| C | -6.03952700 | -0.91623600 | 0.95979900  | C  | 2.23198300  | 2.11207300  | -0.19529900 |
| C | -5.37431800 | 0.67766700  | -0.70391200 | H  | 3.28628500  | 1.86320800  | -0.37577700 |
| C | -6.21844200 | -0.35199600 | -0.29877800 | H  | 2.16969200  | 3.20093900  | -0.07672800 |
| C | -2.80204900 | 2.63298900  | 2.53047300  | H  | 1.95162200  | 1.66368200  | 0.76464800  |
| C | -1.61032500 | 3.31352100  | 2.80713700  | C  | -1.93341800 | 1.23318000  | -2.63139800 |
| C | -3.93814700 | 3.45320700  | 2.49405400  | H  | -1.38907100 | 1.43801800  | -3.56251600 |
| C | -1.52758600 | 4.68997500  | 2.97581900  | H  | -2.88567000 | 1.76770100  | -2.69679500 |
| C | -3.90189400 | 4.83326500  | 2.67725400  | C  | -0.89428100 | 4.16501400  | -0.63791500 |
| C | -2.68354000 | 5.46138700  | 2.90706800  | H  | -0.45486500 | 4.33944800  | 0.35110000  |
| C | -2.38573500 | 0.09032800  | 3.48181100  | H  | -0.19081900 | 4.61028100  | -1.35564200 |
| C | -2.22679500 | -1.29040500 | 3.28226900  | C  | -2.16862500 | -0.27871700 | -2.47824500 |
| C | -2.05135900 | 0.52593900  | 4.77042800  | H  | -2.69177800 | -0.51585800 | -1.54527800 |
| C | -1.76668400 | -2.16808500 | 4.25309600  | H  | -2.77143700 | -0.67358400 | -3.30622700 |
| C | -1.57571300 | -0.32122000 | 5.77044500  | H  | -1.22342100 | -0.83576500 | -2.46549600 |
| C | -1.42606100 | -1.67730700 | 5.51004000  | C  | -2.26250500 | 4.84874600  | -0.75198300 |
| F | -0.95961700 | -2.50202400 | 6.45464900  | H  | -2.72046900 | 4.68095500  | -1.73385200 |
|   |             |             |             | H  | -2.96453600 | 4.47739000  | -0.00221000 |
|   |             |             |             | H  | -2.17232700 | 5.93411200  | -0.61293000 |
|   |             |             |             | Sn | -0.76153300 | 2.05076300  | -1.02461700 |

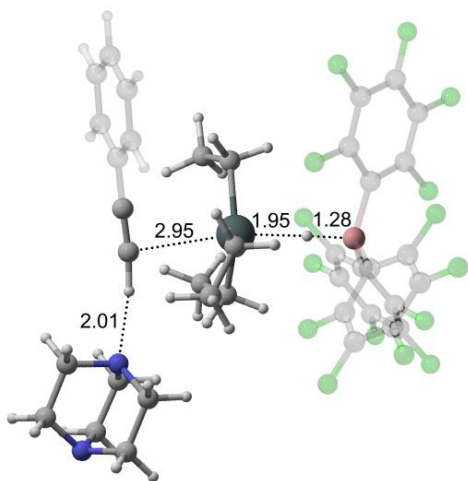

**9**

|   |             |             |             |    |             |             |             |
|---|-------------|-------------|-------------|----|-------------|-------------|-------------|
| B | 1.79047200  | -0.47852900 | -0.36053800 | F  | 2.48766300  | 3.87415700  | -2.70103000 |
| C | 1.57965600  | -2.04950400 | -0.68030400 | F  | 4.06994200  | 2.72959400  | -4.62631800 |
| C | 0.67547600  | -2.44607400 | -1.66459100 | F  | 4.60257200  | 0.04901200  | -4.52015900 |
| C | 2.23529700  | -3.09798300 | -0.03483800 | F  | 3.59596600  | -1.46524000 | -2.55629200 |
| C | 0.40354000  | -3.76903700 | -1.98972200 | H  | 0.59191000  | -0.03432300 | -0.32022900 |
| C | 2.00169500  | -4.44101300 | -0.32744900 | N  | -6.21299900 | -2.04706500 | 4.31910100  |
| C | 1.07488800  | -4.78077200 | -1.30851100 | C  | -6.84505100 | -0.74752400 | 4.04489200  |
| C | 2.35336500  | -0.14892800 | 1.11970500  | H  | -6.86548200 | -0.17545900 | 4.97916700  |
| C | 3.57582700  | 0.46236700  | 1.40014500  | H  | -7.88316700 | -0.92821100 | 3.74430600  |
| C | 1.59365400  | -0.46984600 | 2.24443300  | C  | -6.18088700 | -2.83424300 | 3.07658500  |
| C | 4.00815700  | 0.75023400  | 2.69463400  | H  | -7.21421500 | -2.99676900 | 2.75021700  |
| C | 1.97652200  | -0.20004900 | 3.55168200  | H  | -5.74740300 | -3.81449600 | 3.30379500  |
| C | 3.20118400  | 0.42193100  | 3.77948100  | C  | -4.83294800 | -1.82076900 | 4.77723300  |
| C | 2.45625000  | 0.37771800  | -1.55928700 | H  | -4.37764400 | -2.79652800 | 4.97911000  |
| C | 3.27440900  | -0.15252900 | -2.55721500 | H  | -4.87221200 | -1.27167300 | 5.72454500  |
| C | 2.23478300  | 1.75125400  | -1.65625200 | N  | -4.88206900 | -0.78734200 | 2.51434000  |
| C | 3.82197700  | 0.61370000  | -3.58512300 | C  | -5.34980400 | -2.08539900 | 1.98587700  |
| C | 2.75360400  | 2.55683600  | -2.66243300 | H  | -4.46934100 | -2.66202700 | 1.68465300  |
| C | 3.55662200  | 1.97851200  | -3.64171400 | H  | -5.94213200 | -1.89105600 | 1.08433100  |
| F | 2.66051700  | -5.41012000 | 0.32785500  | C  | -6.05441300 | 0.01060900  | 2.93143800  |
| F | 3.16343600  | -2.84723800 | 0.91478200  | H  | -6.67303000 | 0.18812700  | 2.04386300  |
| F | 0.83274800  | -6.06730900 | -1.59721900 | H  | -5.69240500 | 0.98461700  | 3.28082700  |
| F | -0.49606100 | -4.07757100 | -2.94049400 | C  | -4.02788600 | -1.03084800 | 3.69591400  |
| F | -0.00257300 | -1.49691000 | -2.36588000 | H  | -3.68986800 | -0.06003800 | 4.07251900  |
| F | 0.39103300  | -1.08601400 | 2.08053800  | H  | -3.14074600 | -1.58431500 | 3.36874700  |
| F | 1.18189000  | -0.52546800 | 4.58720300  | C  | -4.04460400 | 1.30574700  | 0.41293200  |
| F | 3.59806400  | 0.69776000  | 5.02972700  | C  | -3.92108000 | 2.31552700  | -0.25702100 |
| F | 5.19471100  | 1.34197400  | 2.90453200  | C  | -3.73737800 | 3.49475900  | -1.04093600 |
| F | 4.42510900  | 0.79474100  | 0.40345800  | C  | -4.29379100 | 3.58801100  | -2.33046700 |
| F | 1.46735700  | 2.37135000  | -0.71886800 | H  | -4.88388800 | 2.76356400  | -2.71660200 |
|   |             |             |             | C  | -4.07745400 | 4.72695400  | -3.10299400 |
|   |             |             |             | H  | -4.50567900 | 4.79041600  | -4.09913500 |
|   |             |             |             | C  | -3.30759100 | 5.78161700  | -2.60195600 |
|   |             |             |             | H  | -3.13455300 | 6.66463600  | -3.21030300 |
|   |             |             |             | C  | -2.76260900 | 5.70082900  | -1.31657800 |
|   |             |             |             | H  | -2.16782300 | 6.52017100  | -0.92366800 |
|   |             |             |             | C  | -2.97679100 | 4.56701700  | -0.53599000 |
|   |             |             |             | H  | -2.55864600 | 4.49919700  | 0.46299800  |
|   |             |             |             | H  | -4.25646900 | 0.47293200  | 1.08464000  |
|   |             |             |             | Sn | -1.23905200 | 0.62838600  | -0.21193000 |
|   |             |             |             | C  | -2.07430600 | -1.31019400 | 0.18954000  |
|   |             |             |             | H  | -2.55999800 | -1.23616000 | 1.16695000  |
|   |             |             |             | H  | -1.21691800 | -1.97867900 | 0.31499400  |
|   |             |             |             | C  | -3.04191800 | -1.86051400 | -0.86483300 |

|   |             |             |             |   |            |             |             |
|---|-------------|-------------|-------------|---|------------|-------------|-------------|
| H | -3.42378900 | -2.84412700 | -0.56237400 | C | 3.64070600 | 0.14636800  | -2.33453200 |
| H | -3.90692000 | -1.20402900 | -1.01018200 | C | 2.46222000 | 1.92948800  | -1.36790200 |
| H | -2.55296600 | -1.98795600 | -1.83464100 | C | 4.09928000 | 0.97936000  | -3.35418000 |
| C | -0.77772900 | 1.92708700  | 1.43488300  | C | 2.89159800 | 2.80003100  | -2.36257200 |
| H | -1.00337300 | 2.94598800  | 1.10241400  | C | 3.71887100 | 2.31713900  | -3.37208400 |
| H | 0.30849600  | 1.87922600  | 1.55821700  | F | 3.65385400 | -5.19636900 | 0.35845500  |
| C | -1.49024700 | 1.60526300  | 2.75323300  | F | 3.90488900 | -2.61341900 | 1.00543000  |
| H | -1.26925300 | 0.58977600  | 3.09638100  | F | 1.82191200 | -5.99657800 | -1.51045200 |
| H | -1.16998400 | 2.29423100  | 3.54573100  | F | 0.22690200 | -4.12516200 | -2.72968900 |
| H | -2.57688200 | 1.69711900  | 2.65646400  | F | 0.46062800 | -1.52773600 | -2.09352400 |
| C | -1.25527100 | 1.43194000  | -2.20056500 | F | 0.98290300 | -1.15895700 | 2.36106900  |
| H | -0.24301200 | 1.28539700  | -2.59000100 | F | 1.82219100 | -0.60699000 | 4.84933700  |
| H | -1.40457100 | 2.51206700  | -2.10576100 | F | 4.15126600 | 0.79142300  | 5.24465300  |
| C | -2.28311000 | 0.81126000  | -3.15555900 | F | 5.61215500 | 1.61678200  | 3.08209300  |
| H | -2.29344600 | 1.35207000  | -4.11053600 | F | 4.79560200 | 1.07744800  | 0.59632700  |
| H | -2.04525300 | -0.23426500 | -3.37095100 | F | 1.66849400 | 2.46587900  | -0.40199000 |
| H | -3.29915600 | 0.84326300  | -2.74919200 | F | 2.51517600 | 4.09289800  | -2.36240800 |

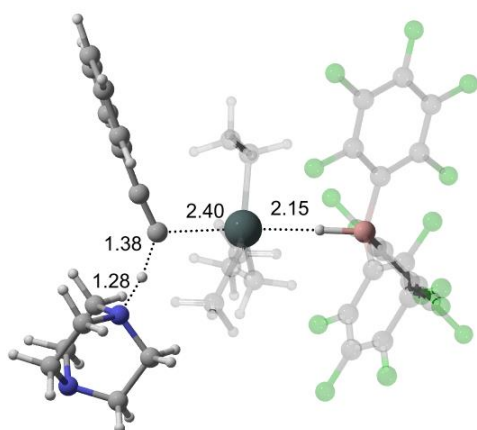

### TS7

|   |            |             |             |   |             |             |             |
|---|------------|-------------|-------------|---|-------------|-------------|-------------|
| B | 2.21327000 | -0.36157100 | -0.11991000 | H | -5.10287400 | -2.88237700 | 4.17273300  |
| C | 2.16984800 | -1.94293600 | -0.49015100 | H | -4.63435700 | -1.58621900 | 5.27796400  |
| C | 1.27128100 | -2.40989800 | -1.44908700 | N | -4.67477600 | -0.19200900 | 2.41641900  |
| C | 2.96346400 | -2.93366300 | 0.08821600  | C | -5.83487100 | -0.77528900 | 1.68920200  |
| C | 1.13202700 | -3.74567300 | -1.80706500 | H | -5.44177500 | -1.50233600 | 0.97392700  |
| C | 2.86430100 | -4.28571100 | -0.23743800 | H | -6.30334100 | 0.03567300  | 1.12413500  |
| C | 1.93740000 | -4.69777300 | -1.18949100 | C | -5.14536700 | 0.88451300  | 3.33095500  |
| C | 2.82647500 | -0.04235300 | 1.35142200  | H | -5.55883000 | 1.68313200  | 2.70824500  |
| C | 4.00856200 | 0.65192200  | 1.61016900  | H | -4.26559300 | 1.28041200  | 3.84477500  |
| C | 2.13961300 | -0.45341900 | 2.49370400  | C | -3.98759900 | -1.25498300 | 3.19767300  |
| C | 4.46657800 | 0.93852700  | 2.89632000  | H | -3.09133600 | -0.81641800 | 3.64340700  |
| C | 2.55111200 | -0.19136300 | 3.79416200  | H | -3.67520300 | -2.02799300 | 2.49271600  |
| C | 3.73031300 | 0.51871700  | 3.99907000  | C | -3.33046100 | 1.16545800  | 0.59106400  |
| C | 2.79933700 | 0.57720700  | -1.30849700 | C | -3.60364200 | 2.19759100  | -0.03495600 |
|   |            |             |             | C | -3.80424100 | 3.38616800  | -0.79023300 |

|    |             |             |             |
|----|-------------|-------------|-------------|
| C  | -4.50147700 | 3.35128000  | -2.01529600 |
| H  | -4.90217100 | 2.40741900  | -2.37070700 |
| C  | -4.65954500 | 4.51590900  | -2.76212700 |
| H  | -5.19401900 | 4.48245100  | -3.70708500 |
| C  | -4.12228500 | 5.72349500  | -2.30284500 |
| H  | -4.24085800 | 6.62821900  | -2.89224700 |
| C  | -3.42808000 | 5.76759400  | -1.08888200 |
| H  | -3.00611200 | 6.70412000  | -0.73619900 |
| C  | -3.27016800 | 4.60905900  | -0.33260200 |
| H  | -2.72752700 | 4.63031400  | 0.60748800  |
| H  | -3.92409600 | 0.37219900  | 1.54902900  |
| Sn | -1.04997500 | 0.53342500  | 0.19004500  |
| C  | -1.44355000 | -1.54736500 | 0.56834200  |
| H  | -1.69217400 | -1.61872400 | 1.63240200  |
| H  | -0.50002300 | -2.08316100 | 0.44504500  |
| C  | -2.53716500 | -2.16833000 | -0.30745200 |
| H  | -2.77402800 | -3.19235200 | 0.01400500  |
| H  | -3.46652800 | -1.58557700 | -0.28427800 |
| H  | -2.22022500 | -2.22573400 | -1.35360700 |
| C  | -0.39448000 | 1.78718000  | 1.81070100  |
| H  | -0.64843900 | 2.81396100  | 1.52068400  |
| H  | 0.69570500  | 1.73310800  | 1.85011300  |
| C  | -1.00738000 | 1.44372400  | 3.17237400  |
| H  | -0.75948200 | 0.42213900  | 3.48233600  |
| H  | -0.63751000 | 2.11735700  | 3.95677700  |
| H  | -2.09960000 | 1.53878100  | 3.14926800  |
| C  | -0.96880600 | 1.27459100  | -1.82368900 |
| H  | 0.05199600  | 1.12917200  | -2.18494500 |
| H  | -1.13573400 | 2.35641400  | -1.75883400 |
| C  | -1.97029800 | 0.62511100  | -2.78742400 |
| H  | -1.94557500 | 1.12189700  | -3.76648000 |
| H  | -1.73590600 | -0.43134300 | -2.95144200 |
| H  | -2.99855100 | 0.68541100  | -2.41419200 |

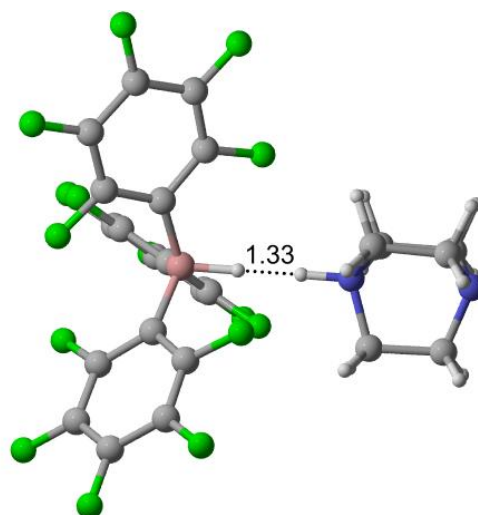

10

|   |             |             |             |
|---|-------------|-------------|-------------|
| B | -0.22626900 | -0.11696800 | 0.49322400  |
| F | 1.34660000  | 2.30058900  | 0.14530000  |
| F | 2.19718800  | 3.96051100  | 2.06976300  |
| F | 1.56105800  | 3.48705100  | 4.69765500  |
| F | 0.05518300  | 1.29816600  | 5.34938100  |
| F | -0.80971200 | -0.37774300 | 3.44315000  |
| F | -2.61542800 | -1.78551700 | 1.28492000  |
| F | -2.55120100 | -4.39733800 | 1.88708700  |
| F | -0.18635600 | -5.77235700 | 1.86281800  |
| F | 2.13524400  | -4.46366500 | 1.20551300  |
| F | 2.09877100  | -1.85379000 | 0.59794400  |
| F | -2.64318800 | 1.33080800  | 1.57319000  |
| F | -4.72816500 | 2.17329100  | 0.11256300  |
| F | -4.81750400 | 1.70668000  | -2.58149700 |
| F | -2.74759400 | 0.37370000  | -3.79520200 |
| F | -0.65147500 | -0.47753900 | -2.35922800 |
| C | 0.22925100  | 0.87019000  | 1.70351400  |
| C | 0.99312700  | 2.00423000  | 1.43603700  |
| C | 1.45035600  | 2.89024600  | 2.40559100  |
| C | 1.13273700  | 2.65180400  | 3.73895700  |
| C | 0.36832000  | 1.53466800  | 4.06501400  |
| C | -0.06360100 | 0.67745400  | 3.05456900  |
| C | -0.26809900 | -1.69051800 | 0.90396100  |
| C | -1.41744000 | -2.40555700 | 1.24450700  |
| C | -1.41245900 | -3.76146700 | 1.56688800  |
| C | -0.21145100 | -4.46576400 | 1.55890300  |
| C | 0.96362300  | -3.79825900 | 1.22834400  |
| C | 0.90353300  | -2.44445200 | 0.91586800  |
| C | -1.54156500 | 0.39345500  | -0.31645300 |
| C | -2.62013300 | 1.07636700  | 0.24809400  |

|   |             |             |             |   |             |             |             |
|---|-------------|-------------|-------------|---|-------------|-------------|-------------|
| C | -3.71833900 | 1.52077700  | -0.48582500 | F | 0.60179800  | -0.13523000 | 3.21592000  |
| C | -3.77050600 | 1.28372100  | -1.85686600 | F | -2.97493300 | -1.85288200 | 1.53976000  |
| C | -2.72100800 | 0.60496200  | -2.46788500 | F | -2.75052800 | -4.36562300 | 2.42837200  |
| C | -1.64915500 | 0.18170000  | -1.68928500 | F | -0.30910400 | -5.58985600 | 2.52045700  |
| N | 2.45218100  | 0.11751500  | -1.89595700 | F | 1.92479900  | -4.23503300 | 1.71201000  |
| N | 4.33538600  | 0.26572700  | -3.56760900 | F | 1.72982100  | -1.70752900 | 0.84156100  |
| C | 2.56959500  | -1.20422800 | -2.60422200 | F | -2.36528000 | 2.19887900  | 1.17656500  |
| H | 1.59823800  | -1.40818500 | -3.05766600 | F | -4.63115200 | 2.88199600  | -0.08439700 |
| H | 2.76122000  | -1.95606000 | -1.83698600 | F | -5.61289500 | 1.32354500  | -2.10241000 |
| C | 3.72312400  | -1.06711700 | -3.64040100 | F | -4.28883600 | -0.95114700 | -2.83682000 |
| H | 4.49817600  | -1.81580000 | -3.45424000 | F | -2.02565500 | -1.66635600 | -1.57349000 |
| H | 3.34937900  | -1.22007400 | -4.65670600 | C | 0.22627600  | 0.93341100  | 1.11703100  |
| C | 3.32712900  | 1.28750200  | -3.87743800 | C | 0.53770200  | 2.05709200  | 0.34105400  |
| H | 2.97971700  | 1.13269100  | -4.90273200 | C | 1.42240100  | 3.04654200  | 0.74957800  |
| H | 3.80609700  | 2.26962100  | -3.83274100 | C | 2.02789200  | 2.94589700  | 2.00023900  |
| C | 2.13558700  | 1.21120700  | -2.87859000 | C | 1.73510300  | 1.85885500  | 2.81892800  |
| H | 1.99266300  | 2.12541700  | -2.30018000 | C | 0.85230700  | 0.88122500  | 2.36728000  |
| H | 1.18840300  | 0.94545000  | -3.35072100 | C | -0.63286400 | -1.66548100 | 1.12099100  |
| C | 3.72476800  | 0.42996800  | -1.15764100 | C | -1.74408600 | -2.40324300 | 1.54724700  |
| H | 3.86145600  | -0.35726300 | -0.41448800 | C | -1.65530500 | -3.70900800 | 2.02253000  |
| H | 3.56291700  | 1.37582100  | -0.63824500 | C | -0.41327000 | -4.33494300 | 2.07441700  |
| C | 4.86448100  | 0.49068600  | -2.21621900 | C | 0.72307100  | -3.64098100 | 1.66326000  |
| H | 5.35772400  | 1.46645800  | -2.19454100 | C | 0.59326700  | -2.33405700 | 1.21267900  |
| H | 5.62259700  | -0.27041500 | -2.01143000 | C | -2.07943900 | 0.24438100  | -0.15799200 |
| H | 1.66768900  | 0.05435500  | -1.19929800 | C | -2.79569500 | 1.39759800  | 0.17978100  |
| H | 0.67362600  | -0.04002200 | -0.31362300 | C | -3.97774600 | 1.77096100  | -0.45233000 |
|   |             |             |             | C | -4.48295500 | 0.97719500  | -1.47867900 |
|   |             |             |             | C | -3.80577900 | -0.18280400 | -1.85001600 |
|   |             |             |             | C | -2.63765600 | -0.52951000 | -1.18220800 |
|   |             |             |             | N | 2.56412200  | 0.08720300  | -1.77784100 |
|   |             |             |             | N | 4.83525600  | 0.30049200  | -2.94895400 |
|   |             |             |             | C | 2.91079900  | -1.19063000 | -2.43343600 |
|   |             |             |             | H | 2.11203800  | -1.43021100 | -3.14449000 |
|   |             |             |             | H | 2.91746000  | -1.96986800 | -1.66422500 |
|   |             |             |             | C | 4.29744600  | -1.05540500 | -3.14010200 |
|   |             |             |             | H | 5.02142800  | -1.77023800 | -2.73390300 |
|   |             |             |             | H | 4.21561400  | -1.24196300 | -4.21657800 |
|   |             |             |             | C | 3.88592000  | 1.27428100  | -3.51043200 |
|   |             |             |             | H | 3.79606400  | 1.08176200  | -4.58521600 |
|   |             |             |             | H | 4.31103000  | 2.27637600  | -3.38738900 |
|   |             |             |             | C | 2.50157100  | 1.15663500  | -2.79391900 |
|   |             |             |             | H | 2.22467300  | 2.08781500  | -2.29087100 |
|   |             |             |             | H | 1.69717100  | 0.90806100  | -3.49506700 |
|   |             |             |             | C | 3.60633300  | 0.41741800  | -0.78514200 |

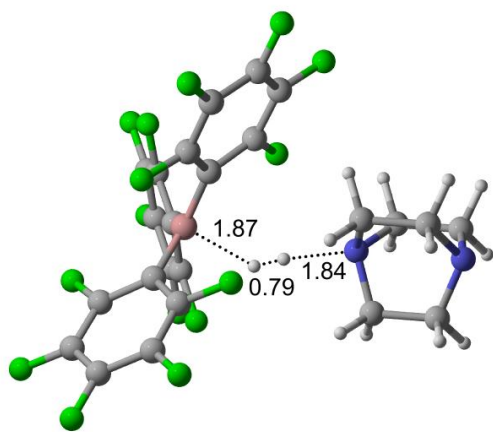

**TS8**

|   |             |             |             |  |  |  |  |
|---|-------------|-------------|-------------|--|--|--|--|
| B | -0.75429700 | -0.18364500 | 0.58653800  |  |  |  |  |
| F | -0.01214400 | 2.20801400  | -0.88034200 |  |  |  |  |
| F | 1.70970300  | 4.08522000  | -0.05112400 |  |  |  |  |
| F | 2.88307000  | 3.88749500  | 2.41009800  |  |  |  |  |
| F | 2.30513500  | 1.76206200  | 4.02794800  |  |  |  |  |

|   |            |             |             |   |             |             |             |
|---|------------|-------------|-------------|---|-------------|-------------|-------------|
| H | 3.61763200 | -0.37404000 | -0.03082000 | C | -1.51817700 | 1.70651200  | 1.12737300  |
| H | 3.31928400 | 1.34920500  | -0.28871000 | H | -1.51857000 | 2.64002100  | 0.55258000  |
| C | 4.98639900 | 0.55510900  | -1.50804200 | H | -0.09847000 | 0.43967200  | -1.12607300 |
| H | 5.40223600 | 1.56065900  | -1.38080700 | H | 0.83899900  | 0.22397400  | -1.08552000 |
| H | 5.71554500 | -0.15863900 | -1.10918100 | B | -4.81826900 | -0.46642300 | 1.19650000  |
| H | 0.86568000 | -0.31340900 | -1.19934700 | C | -5.16501500 | 0.93725100  | 1.93052400  |
| H | 0.12695600 | -0.54272200 | -1.01908300 | C | -4.97027500 | 2.14486200  | 1.26076700  |

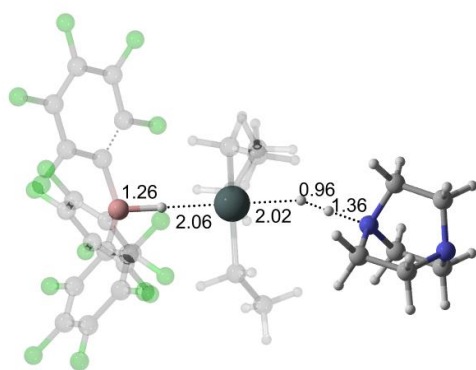

**TS9**

|    |             |             |             |   |             |             |             |
|----|-------------|-------------|-------------|---|-------------|-------------|-------------|
| N  | 2.16817100  | -0.04611300 | -1.05574300 | C | -5.37188400 | -1.70271100 | -1.04185000 |
| N  | 4.66583300  | -0.52164900 | -1.01081900 | C | -7.90173400 | -0.67524300 | -1.30217700 |
| C  | 2.56253700  | -0.69599600 | -2.33156300 | C | -6.13253500 | -2.05883100 | -2.14876700 |
| H  | 2.29366500  | -0.01531000 | -3.14512400 | C | -7.41519800 | -1.53509200 | -2.28184700 |
| H  | 1.96370700  | -1.60461700 | -2.43986400 | F | -6.40279700 | 2.36164300  | 5.08260900  |
| C  | 4.09419800  | -0.99354600 | -2.27948000 | F | -5.93102100 | -0.02677300 | 3.97487400  |
| H  | 4.28682100  | -2.06735200 | -2.36535400 | F | -5.94709400 | 4.66571600  | 3.67952300  |
| H  | 4.61819000  | -0.49523200 | -3.10095100 | F | -4.99106900 | 4.52082800  | 1.11202100  |
| C  | 4.43509900  | 0.92387100  | -0.88480400 | F | -4.50546900 | 2.13270300  | -0.01837700 |
| H  | 4.94383400  | 1.42725600  | -1.71278400 | F | -2.51797200 | -0.64425100 | 2.93620700  |
| H  | 4.89600200  | 1.26731100  | 0.04639100  | F | -1.89325000 | -2.65781800 | 4.59819700  |
| C  | 2.90549400  | 1.23369900  | -0.89687700 | F | -3.55992100 | -4.82528900 | 4.83241400  |
| H  | 2.56579400  | 1.69743200  | 0.03344500  | F | -5.86291000 | -4.92234500 | 3.35799500  |
| H  | 2.61444900  | 1.88713000  | -1.72505400 | F | -6.50516200 | -2.92763100 | 1.69713400  |
| C  | 2.47092000  | -0.94943700 | 0.08494300  | F | -4.12975100 | -2.25458800 | -0.96091100 |
| H  | 1.88967100  | -1.86420400 | -0.05624300 | F | -5.64398500 | -2.89203000 | -3.08618100 |
| H  | 2.11605400  | -0.46175300 | 0.99714900  | F | -8.17292400 | -1.85771000 | -3.34110100 |
| C  | 4.00866400  | -1.21595300 | 0.10580800  | F | -9.14206400 | -0.17165100 | -1.41688600 |
| H  | 4.45507700  | -0.86316800 | 1.04052700  | F | -7.65211700 | 0.47349000  | 0.70884700  |
| H  | 4.22063000  | -2.28604900 | 0.01970800  | H | -3.70894200 | -0.25698200 | 0.64668000  |
| Sn | -1.88912200 | 0.10108200  | -0.25195600 | H | -3.92539100 | 0.41343900  | -1.96957600 |
| C  | -2.84668000 | 0.47941400  | -2.13515100 | H | -2.37273800 | 1.74810500  | 1.80743300  |
| H  | -2.57305100 | -0.34000600 | -2.81040500 | H | -2.06889300 | -2.37765000 | 0.77891800  |
| C  | -1.24846300 | -1.89087200 | 0.24568800  | C | -2.47524500 | 1.84092300  | -2.73670000 |
| H  | -0.41828100 | -1.80189600 | 0.95727200  | H | -1.39340000 | 1.93490600  | -2.89433800 |

|   |             |             |             |   |             |             |             |
|---|-------------|-------------|-------------|---|-------------|-------------|-------------|
| H | -2.96303800 | 1.98729600  | -3.70921600 | C | -0.92906600 | -2.39605700 | 0.38680200  |
| H | -2.79150800 | 2.66486500  | -2.08721400 | C | -1.02278700 | -3.72818600 | 0.79643100  |
| C | -0.21691800 | 1.55226600  | 1.92340900  | C | 0.09887200  | -4.38793500 | 1.27742000  |
| H | -0.07381200 | 2.39216500  | 2.61579400  | C | 1.29729300  | -3.68600800 | 1.35881500  |
| H | -0.21657100 | 0.63435000  | 2.52224100  | C | 1.33573000  | -2.36272000 | 0.94430400  |
| H | 0.65911200  | 1.52543200  | 1.26342000  | C | -0.99583300 | 0.46442200  | -0.78197900 |
| C | -0.84969000 | -2.72450900 | -0.97870100 | C | -1.85384500 | 1.44705200  | -0.26908400 |
| H | -0.46436500 | -3.70991700 | -0.68379300 | C | -3.03157000 | 1.86268800  | -0.89462100 |
| H | -1.70738100 | -2.89518700 | -1.63754500 | C | -3.42608600 | 1.28053400  | -2.09052700 |
| H | -0.07287900 | -2.23365100 | -1.57926600 | C | -2.63599100 | 0.26974200  | -2.62867200 |

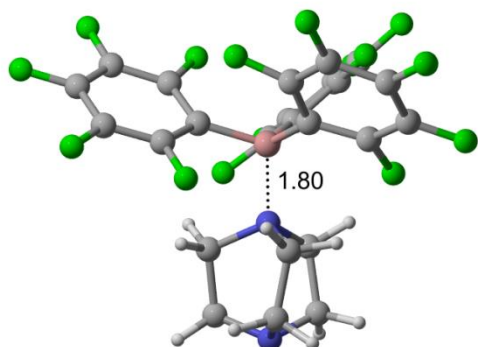

**11**

|   |             |             |             |   |            |             |             |
|---|-------------|-------------|-------------|---|------------|-------------|-------------|
| B | 0.38134200  | -0.06498400 | -0.04124900 | H | 2.40825700 | 1.29589600  | -4.29581100 |
| F | 0.98930800  | 2.84022600  | -0.13595500 | C | 3.09248100 | 2.22858100  | -2.96168700 |
| F | 1.66082300  | 4.41990400  | 1.87435300  | H | 1.37863100 | 0.96568500  | -2.40870200 |
| F | 1.74056200  | 3.45926700  | 4.44652600  | H | 0.91994600 | 1.86957600  | -2.02180300 |
| F | 1.11177400  | 0.83253000  | 4.90471300  | H | 0.65254900 | 0.44099600  | -3.02220300 |
| F | 0.45545100  | -0.77324300 | 2.94433000  | C | 3.00193800 | 0.59454200  | -0.64157200 |
| F | -2.10644900 | -1.86174400 | -0.00457200 | H | 3.17451000 | 0.10751500  | 0.31245100  |
| F | -2.19752900 | -4.37226700 | 0.73112800  | H | 2.84661400 | 1.65517400  | -0.46856300 |
| F | 0.02853300  | -5.66499300 | 1.66855700  | C | 4.17386000 | 0.38094100  | -1.63182100 |
| F | 2.39496200  | -4.28243600 | 1.85115800  | H | 4.84788800 | 1.24292600  | -1.59154200 |
| F | 2.53242000  | -1.74180300 | 1.13470100  | H | 4.75939000 | -0.50707000 | -1.37335600 |
| F | -1.62051700 | 2.05593800  | 0.91400000  |   |            |             |             |
| F | -3.78738600 | 2.82160600  | -0.33933900 |   |            |             |             |
| F | -4.54774100 | 1.67019500  | -2.70605400 |   |            |             |             |
| F | -3.00480300 | -0.33937000 | -3.76707800 |   |            |             |             |
| F | -0.81600800 | -1.15644800 | -2.53074000 |   |            |             |             |
| C | 0.78694500  | 0.89485400  | 1.23928200  |   |            |             |             |
| C | 1.06827700  | 2.25934600  | 1.09293500  |   |            |             |             |
| C | 1.39570700  | 3.12749900  | 2.12418900  |   |            |             |             |
| C | 1.42814600  | 2.64828300  | 3.42990100  |   |            |             |             |
| C | 1.11400100  | 1.31557500  | 3.65339900  |   |            |             |             |
| C | 0.79601000  | 0.48184200  | 2.57873300  |   |            |             |             |
| C | 0.25707300  | -1.64934500 | 0.40578800  |   |            |             |             |

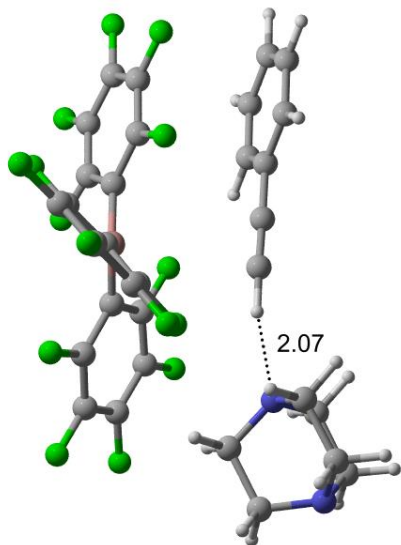

12

|   |             |             |             |   |             |             |             |
|---|-------------|-------------|-------------|---|-------------|-------------|-------------|
| C | -0.01792100 | -1.08905500 | -0.65698500 | H | 4.84339600  | -2.38757100 | -3.11824600 |
| C | -1.21519700 | -1.28975300 | -0.63352500 | H | 5.56787400  | -0.84152300 | -2.65667600 |
| C | -2.62291800 | -1.52033800 | -0.56893200 | C | 5.51530800  | -1.25078600 | -0.04973600 |
| C | -3.44631400 | -1.24310500 | -1.67701600 | H | 6.18113200  | -0.44610800 | -0.38147600 |
| H | -2.99699900 | -0.85542300 | -2.58572000 | H | 5.97329900  | -1.71873800 | 0.82908700  |
| C | -4.82247800 | -1.44475100 | -1.59758200 | B | -0.59280200 | 1.74478500  | 1.12778600  |
| H | -5.44944900 | -1.21362900 | -2.45375800 | F | -1.99834500 | 1.20427900  | 3.64975700  |
| C | -5.39829500 | -1.92095900 | -0.41621600 | F | -4.63635000 | 0.81516600  | 3.88364500  |
| H | -6.47330800 | -2.06348200 | -0.35297800 | F | -6.25355000 | 0.98765100  | 1.69451800  |
| C | -4.58641100 | -2.20858900 | 0.68530400  | F | -5.18599500 | 1.54756300  | -0.75404300 |
| H | -5.02892800 | -2.58234400 | 1.60472000  | F | -2.54392300 | 1.81759700  | -1.04314800 |
| C | -3.20850600 | -2.01590400 | 0.61287900  | F | -1.83571200 | 4.32709300  | 0.59411100  |
| H | -2.57606600 | -2.23837200 | 1.46435500  | F | -1.03543700 | 6.08159600  | -1.26968900 |
| H | 1.05993800  | -0.98384200 | -0.63887800 | F | 1.11741900  | 5.52216100  | -2.85554800 |
| N | 3.09637300  | -1.34171500 | -0.61859100 | F | 2.48377000  | 3.17649400  | -2.52384400 |
| C | 3.46114500  | -1.05411300 | -2.01991800 | F | 1.73098300  | 1.43379200  | -0.63752200 |
| H | 3.42330600  | 0.03113900  | -2.16025600 | F | 1.93230900  | 2.95748500  | 1.97686100  |
| H | 2.69451400  | -1.49902200 | -2.66539700 | F | 3.81201600  | 1.75472600  | 3.43646300  |
| C | 3.12663800  | -2.80111800 | -0.40329900 | F | 3.43305800  | -0.78703000 | 4.35691200  |
| H | 2.37535400  | -3.25389600 | -1.06062100 | F | 1.10652900  | -2.10415900 | 3.80688900  |
| H | 2.81919200  | -2.99655700 | 0.63086100  | F | -0.81068000 | -0.91919600 | 2.38986000  |
| C | 4.08522300  | -0.70926300 | 0.27323200  | C | -2.12850700 | 1.49976800  | 1.28600900  |
| H | 3.79812000  | -0.93817500 | 1.30516000  | C | -2.73743700 | 1.24408100  | 2.52429600  |
| H | 4.02059900  | 0.37573100  | 0.14039900  | C | -4.10611700 | 1.06393100  | 2.67710500  |
| N | 5.44648700  | -2.25664900 | -1.12203500 | C | -4.93564000 | 1.15276100  | 1.56231000  |
| C | 4.55990700  | -3.35121700 | -0.69396000 | C | -4.38673100 | 1.42838100  | 0.31379100  |
| H | 4.99869400  | -3.81424400 | 0.19719500  | C | -3.01212600 | 1.58264100  | 0.19602600  |
| H | 4.54532600  | -4.10736200 | -1.48710500 | C | -0.11010600 | 2.77880800  | 0.04346600  |
| C | 4.88050000  | -1.62920400 | -2.32790900 | C | -0.77114900 | 3.99621800  | -0.16487900 |
|   |             |             |             | C | -0.37378200 | 4.92596300  | -1.11860400 |
|   |             |             |             | C | 0.72517600  | 4.64557500  | -1.92723500 |
|   |             |             |             | C | 1.41805700  | 3.45005300  | -1.75537700 |
|   |             |             |             | C | 1.00256400  | 2.55759200  | -0.77543600 |
|   |             |             |             | C | 0.46988900  | 1.06791900  | 2.06255300  |
|   |             |             |             | C | 1.68106200  | 1.70032400  | 2.39100200  |
|   |             |             |             | C | 2.67200900  | 1.10514000  | 3.16132200  |
|   |             |             |             | C | 2.48148900  | -0.18935100 | 3.63515100  |
|   |             |             |             | C | 1.29466300  | -0.85796100 | 3.35006100  |
|   |             |             |             | C | 0.31571900  | -0.22232600 | 2.59633300  |



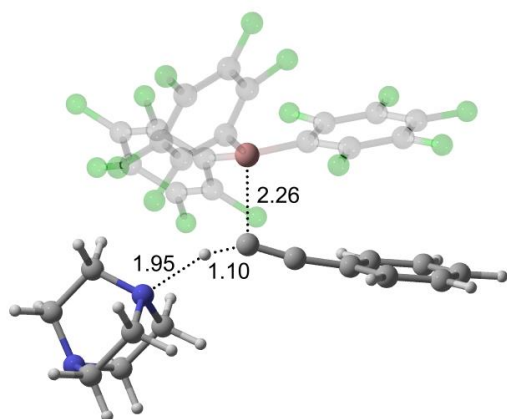

**TS10**

|   |             |             |             |
|---|-------------|-------------|-------------|
| C | 0.04297300  | -0.69427100 | -0.96051400 |
| C | -1.03687900 | -1.24713900 | -1.16066600 |
| C | -2.35190000 | -1.76463800 | -1.21993400 |
| C | -3.15857100 | -1.56962500 | -2.36086000 |
| H | -2.74605700 | -1.04803400 | -3.21791500 |
| C | -4.47801900 | -2.01009200 | -2.36017700 |
| H | -5.10357900 | -1.84355800 | -3.23175400 |
| C | -5.00608000 | -2.64228200 | -1.22849800 |
| H | -6.04258200 | -2.96730000 | -1.22599300 |
| C | -4.20790100 | -2.85241700 | -0.09808200 |
| H | -4.62226000 | -3.34315000 | 0.77770500  |
| C | -2.88391800 | -2.42551900 | -0.09052200 |
| H | -2.25664800 | -2.56859200 | 0.78147900  |
| N | 2.87712900  | -1.59681700 | -0.82101400 |
| C | 3.27516900  | -1.72309600 | -2.23657500 |
| H | 3.46722500  | -0.71614200 | -2.62185400 |
| H | 2.42303400  | -2.13500700 | -2.79017700 |
| C | 2.57857600  | -2.93720500 | -0.28136200 |
| H | 1.72819300  | -3.34365100 | -0.84085600 |
| H | 2.26069800  | -2.82134600 | 0.76006500  |
| C | 3.99208500  | -1.00518700 | -0.05794200 |
| H | 3.66985000  | -0.90129100 | 0.98226900  |
| H | 4.17723200  | -0.00094900 | -0.45119900 |
| N | 4.95165200  | -3.09602800 | -1.01240400 |
| C | 3.84399900  | -3.84596500 | -0.39912100 |
| H | 4.17328600  | -4.19766800 | 0.58493700  |
| H | 3.64629200  | -4.72875600 | -1.01757100 |
| C | 4.53631000  | -2.63939800 | -2.34828400 |
| H | 4.33498200  | -3.52398100 | -2.96305300 |
| H | 5.37775200  | -2.10452700 | -2.80267500 |
| C | 5.25358600  | -1.92121200 | -0.17846700 |
| H | 6.09257400  | -1.38522600 | -0.63601700 |

|   |             |             |             |
|---|-------------|-------------|-------------|
| H | 5.58369200  | -2.27628900 | 0.80421500  |
| B | -0.39734100 | 1.05184600  | 0.39795700  |
| F | -1.68442500 | 0.50895900  | 3.05901500  |
| F | -4.28706600 | 0.16091000  | 3.45520900  |
| F | -6.06470000 | 0.42217900  | 1.39257200  |
| F | -5.14903300 | 1.05317400  | -1.10869900 |
| F | -2.53514700 | 1.34784700  | -1.55529200 |
| F | -1.83865500 | 3.61607100  | 0.11651500  |
| F | -1.14933400 | 5.63495900  | -1.46036700 |
| F | 1.12139800  | 5.50928400  | -2.98357500 |
| F | 2.71144800  | 3.28127500  | -2.85137100 |
| F | 2.06912300  | 1.25816900  | -1.25674900 |
| F | 1.81334400  | 2.68700300  | 1.50612600  |
| F | 3.59513900  | 1.88815500  | 3.30106600  |
| F | 3.48699600  | -0.63650000 | 4.35354200  |
| F | 1.51037600  | -2.34993900 | 3.54992500  |
| F | -0.31432700 | -1.57469400 | 1.77989100  |
| C | -1.95374100 | 0.89500300  | 0.71157400  |
| C | -2.48316200 | 0.61149000  | 1.97562100  |
| C | -3.84616000 | 0.44806200  | 2.21996500  |
| C | -4.75384900 | 0.58660500  | 1.17734000  |
| C | -4.28385900 | 0.90348300  | -0.09359000 |
| C | -2.91883100 | 1.04859400  | -0.29566700 |
| C | 0.02385400  | 2.26861300  | -0.55319400 |
| C | -0.72671100 | 3.45072400  | -0.63116400 |
| C | -0.38065300 | 4.53596600  | -1.43169100 |
| C | 0.77455400  | 4.47969800  | -2.20358300 |
| C | 1.57472500  | 3.34350800  | -2.13835000 |
| C | 1.19834200  | 2.28909800  | -1.31547500 |
| C | 0.66956100  | 0.58262200  | 1.49452800  |
| C | 1.69564300  | 1.41969400  | 1.95375500  |
| C | 2.63591800  | 1.03646500  | 2.90866400  |
| C | 2.58271500  | -0.24217300 | 3.44974100  |
| C | 1.57613700  | -1.11043600 | 3.03619700  |
| C | 0.64932600  | -0.68473800 | 2.09385100  |
| H | 1.13831900  | -0.73391700 | -0.94370500 |

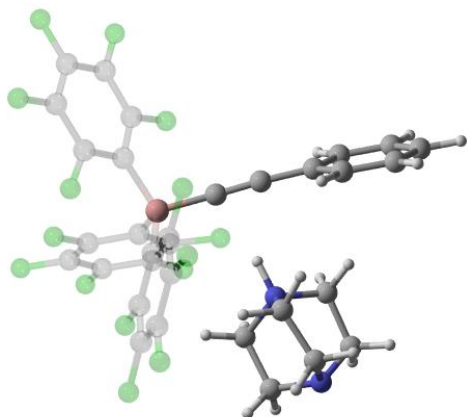

13

|   |             |             |             |   |             |             |             |
|---|-------------|-------------|-------------|---|-------------|-------------|-------------|
| C | -0.43431500 | 1.57227800  | -0.66506700 | C | 1.07732400  | -0.20494500 | 3.79479800  |
| C | -0.09337800 | 2.72372800  | -0.88523300 | C | 1.36217200  | -1.15145400 | 2.81970700  |
| C | 0.38086200  | 4.03798800  | -1.17881000 | C | 0.71125300  | -1.08827400 | 1.58514200  |
| C | 0.68337700  | 4.94137900  | -0.13915100 | C | -0.50744500 | -1.03452600 | -1.34115000 |
| H | 0.48067600  | 4.64988000  | 0.88770700  | C | -1.02314300 | -2.32852800 | -1.20636800 |
| C | 1.21583500  | 6.19785800  | -0.42822300 | C | -0.78921900 | -3.36060900 | -2.10806900 |
| H | 1.43944100  | 6.88696000  | 0.38168100  | C | 0.01212200  | -3.12482800 | -3.22290100 |
| C | 1.45075400  | 6.57539300  | -1.75470700 | C | 0.55746800  | -1.86022600 | -3.40111600 |
| H | 1.86266500  | 7.55554000  | -1.97763200 | C | 0.28591800  | -0.85753600 | -2.47143300 |
| C | 1.13664000  | 5.69251500  | -2.79416900 | C | -2.56962800 | 0.15116100  | -0.20073300 |
| H | 1.30157700  | 5.98800200  | -3.82676400 | C | -3.38275500 | -0.26011000 | 0.85516900  |
| C | 0.60513100  | 4.43462900  | -2.51313300 | C | -4.77534900 | -0.21951500 | 0.81427800  |
| H | 0.35626900  | 3.74473300  | -3.31400900 | C | -5.41654400 | 0.23818700  | -0.33140900 |
| B | -0.92241400 | 0.12124700  | -0.24150200 | C | -4.65061200 | 0.64131100  | -1.42082200 |
| F | -1.36690600 | 1.80584700  | 2.07094900  | C | -3.26299200 | 0.58611000  | -1.33367200 |
| F | -0.14340400 | 1.71538500  | 4.44272800  | N | 5.13344800  | 1.38925700  | 0.03831800  |
| F | 1.69979900  | -0.23861600 | 4.98280700  | C | 4.93581300  | 2.23102300  | -1.14911300 |
| F | 2.28102600  | -2.10617700 | 3.05937600  | H | 5.46698600  | 1.77014200  | -1.98687600 |
| F | 1.09600400  | -2.04447700 | 0.69659600  | H | 5.38631500  | 3.21080200  | -0.96724600 |
| F | -1.77239600 | -2.63611400 | -0.12603500 | C | 4.35446100  | 1.93456700  | 1.15807700  |
| F | -1.31144000 | -4.58162500 | -1.91095100 | H | 4.66057700  | 2.97286900  | 1.31547900  |
| F | 0.26081100  | -4.10478200 | -4.10408700 | H | 4.59757100  | 1.37383800  | 2.06478300  |
| F | 1.35239900  | -1.61198400 | -4.46138800 | C | 4.67564600  | 0.02258300  | -0.24947000 |
| F | 0.89300200  | 0.33932700  | -2.73350800 | H | 4.74953400  | -0.56489900 | 0.66998600  |
| F | -2.84541000 | -0.74859800 | 1.99759100  | H | 5.34524300  | -0.42813100 | -0.98734100 |
| F | -5.50437800 | -0.62514200 | 1.86904200  | N | 2.68162300  | 1.42644000  | -0.57845400 |
| F | -6.75672700 | 0.28382400  | -0.38885600 | C | 2.83262000  | 1.84507300  | 0.86119600  |
| F | -5.25570300 | 1.07367500  | -2.54206000 | H | 2.32163800  | 1.09242700  | 1.46096200  |
| F | -2.57755400 | 0.96693900  | -2.43875600 | H | 2.30704900  | 2.79460800  | 0.97145300  |
| C | -0.22522100 | -0.11345600 | 1.24440600  | C | 3.42157800  | 2.38724400  | -1.47137400 |
| C | -0.47709900 | 0.81206900  | 2.26752200  | H | 3.03476600  | 3.38380400  | -1.25539100 |
| C | 0.14086300  | 0.78778400  | 3.51293200  | H | 3.16355500  | 2.13128800  | -2.50070000 |
|   |             |             |             | C | 3.21572500  | 0.03261700  | -0.78157900 |
|   |             |             |             | H | 3.14991800  | -0.17190700 | -1.85058900 |
|   |             |             |             | H | 2.55719000  | -0.65729000 | -0.25719300 |
|   |             |             |             | H | 1.66630200  | 1.46810200  | -0.80857300 |

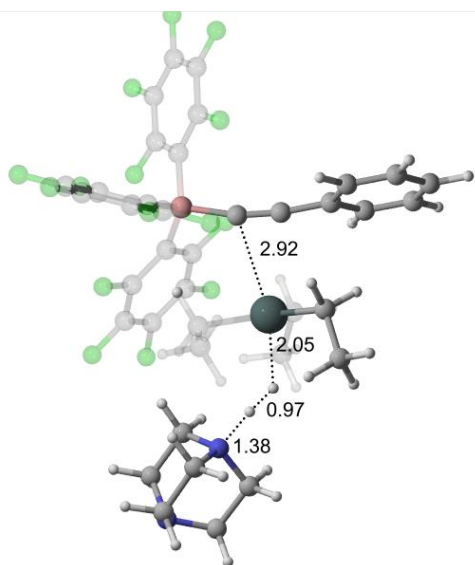

**TS11**

|   |             |             |             |    |             |             |             |
|---|-------------|-------------|-------------|----|-------------|-------------|-------------|
| C | -2.71400900 | -1.05652100 | -0.25349400 | H  | 1.55363500  | 0.85451700  | 6.73091500  |
| C | -2.02076900 | -0.98174600 | -1.26156700 | C  | 2.94657700  | 2.72378500  | 5.47921200  |
| C | -1.37381000 | -0.93163300 | -2.53635000 | H  | 3.54484500  | 1.94889900  | 5.96841500  |
| C | -1.92037000 | -0.12997500 | -3.55727200 | H  | 3.50664700  | 3.66251400  | 5.53670100  |
| H | -2.83089900 | 0.42590200  | -3.35701500 | B  | -3.75741800 | -1.43894600 | 0.89564900  |
| C | -1.29613000 | -0.05885600 | -4.80065300 | F  | -4.24471000 | -4.12729600 | 2.32237100  |
| H | -1.72557100 | 0.56010700  | -5.58344500 | F  | -5.55287200 | -6.20042800 | 1.29470100  |
| C | -0.12256600 | -0.78137700 | -5.04209600 | F  | -6.63346700 | -6.07406900 | -1.21779700 |
| H | 0.36298100  | -0.72207800 | -6.01216700 | F  | -6.36683600 | -3.77467300 | -2.68678700 |
| C | 0.41830500  | -1.58926200 | -4.03663600 | F  | -5.05742800 | -1.66958500 | -1.68299500 |
| H | 1.32120500  | -2.16323200 | -4.22585400 | F  | -6.00322900 | -1.70549000 | 2.66786300  |
| C | -0.20240800 | -1.66880100 | -2.79066100 | F  | -8.09681600 | -0.04846000 | 2.94695800  |
| H | 0.20459300  | -2.30401500 | -2.01070600 | F  | -8.21380500 | 2.28304000  | 1.51068600  |
| N | 1.17689900  | 2.21858400  | 3.82532900  | F  | -6.18056800 | 2.90498900  | -0.21809200 |
| C | 0.65471400  | 1.17455700  | 4.74730100  | F  | -4.10400900 | 1.28428700  | -0.52141800 |
| H | 1.13867000  | 0.23035300  | 4.49048600  | F  | -3.88102800 | -0.05169000 | 3.68040400  |
| H | -0.41586500 | 1.06913000  | 4.56457300  | F  | -2.18942600 | -0.47875200 | 5.66946900  |
| C | 0.52380100  | 3.51888400  | 4.12843500  | F  | -0.20776300 | -2.35178000 | 5.46052800  |
| H | -0.55117400 | 3.38793900  | 3.98317300  | F  | 0.00875300  | -3.83197200 | 3.15743200  |
| H | 0.87801700  | 4.24735100  | 3.39221200  | F  | -1.66956200 | -3.41702700 | 1.12244000  |
| C | 2.64749100  | 2.34265700  | 3.99587100  | C  | -4.53095600 | -2.79766400 | 0.35189100  |
| H | 2.99751900  | 3.10107700  | 3.28841300  | C  | -4.72084800 | -3.98322200 | 1.06364200  |
| H | 3.09318400  | 1.38467300  | 3.71232400  | C  | -5.41186400 | -5.08359100 | 0.55840500  |
| N | 1.69476800  | 2.88241600  | 6.23061800  | C  | -5.96536300 | -5.02391200 | -0.71507600 |
| C | 0.87861400  | 3.92422100  | 5.59311700  | C  | -5.82403300 | -3.85649300 | -1.45831800 |
| H | 1.44034600  | 4.86345300  | 5.61600100  | C  | -5.12524400 | -2.78331700 | -0.91435600 |
| H | -0.02915700 | 4.06463900  | 6.18770800  | C  | -4.94357000 | -0.31114500 | 1.06437000  |
| C | 0.95572800  | 1.61134400  | 6.21459800  | C  | -6.01436800 | -0.57661300 | 1.92407300  |
| H | 0.02751400  | 1.74194200  | 6.77827400  | C  | -7.10821700 | 0.26380700  | 2.09154000  |
|   |             |             |             | C  | -7.17127000 | 1.45037600  | 1.36509700  |
|   |             |             |             | C  | -6.13803300 | 1.76019300  | 0.49028500  |
|   |             |             |             | C  | -5.06163800 | 0.88359000  | 0.35400300  |
|   |             |             |             | C  | -2.86656300 | -1.70502600 | 2.26510900  |
|   |             |             |             | C  | -2.95175900 | -1.01343300 | 3.47449800  |
|   |             |             |             | C  | -2.08347900 | -1.22202300 | 4.54671200  |
|   |             |             |             | C  | -1.07684300 | -2.17164400 | 4.44893700  |
|   |             |             |             | C  | -0.96498700 | -2.91192800 | 3.27674900  |
|   |             |             |             | C  | -1.84509900 | -2.66180600 | 2.23013100  |
|   |             |             |             | H  | 0.95902000  | 1.92784400  | 2.49371000  |
|   |             |             |             | Sn | -0.52826200 | 0.72857500  | 0.47804400  |
|   |             |             |             | C  | -0.25432700 | 1.91398200  | -1.29755900 |
|   |             |             |             | H  | 0.21006900  | 1.27284400  | -2.05256700 |
|   |             |             |             | C  | 0.73766700  | -1.00903500 | 0.65584700  |
|   |             |             |             | H  | 1.34374400  | -0.98925100 | -0.25824400 |

|   |             |             |             |    |             |             |             |
|---|-------------|-------------|-------------|----|-------------|-------------|-------------|
| C | -1.95925000 | 1.58501100  | 1.83201400  | H  | 4.04288300  | -4.08362100 | -1.72547700 |
| H | -1.59967200 | 1.41900200  | 2.85159600  | H  | 2.82904900  | -0.08181600 | -0.63034800 |
| H | 0.86594800  | 1.78556800  | 1.54334600  | H  | 4.63097000  | -0.00407100 | 1.08301800  |
| H | -2.90757700 | 1.06363300  | 1.75112800  | H  | 6.08948200  | -1.98468500 | 1.42314300  |
| H | 0.09955500  | -1.89131200 | 0.58693700  | C  | 2.29124800  | -2.11824000 | -2.21130100 |
| H | -1.25515700 | 2.15597500  | -1.67246200 | C  | 1.38918800  | -1.99539900 | -3.06957900 |
| C | 1.64543600  | -1.08147900 | 1.88583600  | Sn | 2.05056000  | -0.44326600 | -4.61226600 |
| H | 2.26011000  | -1.98995400 | 1.86448300  | C  | 2.71574900  | -1.67484500 | -6.24644500 |
| H | 2.32277800  | -0.22166600 | 1.94099200  | H  | 3.60587700  | -2.22262500 | -5.91424600 |
| H | 1.06354600  | -1.11174500 | 2.81201200  | H  | 1.93948600  | -2.42423500 | -6.44104600 |
| C | -2.15887000 | 3.08005500  | 1.55291500  | C  | 0.25259600  | 0.67874400  | -4.95063300 |
| H | -2.57948300 | 3.24510700  | 0.55574800  | H  | 0.34056000  | 1.09800000  | -5.96204100 |
| H | -2.85972600 | 3.51780400  | 2.27614100  | H  | -0.59084900 | -0.01887400 | -4.96795800 |
| H | -1.22228600 | 3.64672400  | 1.61594900  | C  | 3.58678000  | 0.71534500  | -3.66736600 |
| C | 0.57315900  | 3.19192100  | -1.09509800 | H  | 3.15244200  | 1.14900400  | -2.76060300 |
| H | 0.67366000  | 3.74185100  | -2.04015500 | H  | 4.39849500  | 0.05157600  | -3.34854900 |
| H | 0.11036600  | 3.86998000  | -0.36972800 | C  | 3.01689700  | -0.86408300 | -7.51927100 |
| H | 1.58415700  | 2.96858500  | -0.73473200 | H  | 3.81531100  | -0.13009700 | -7.35794600 |

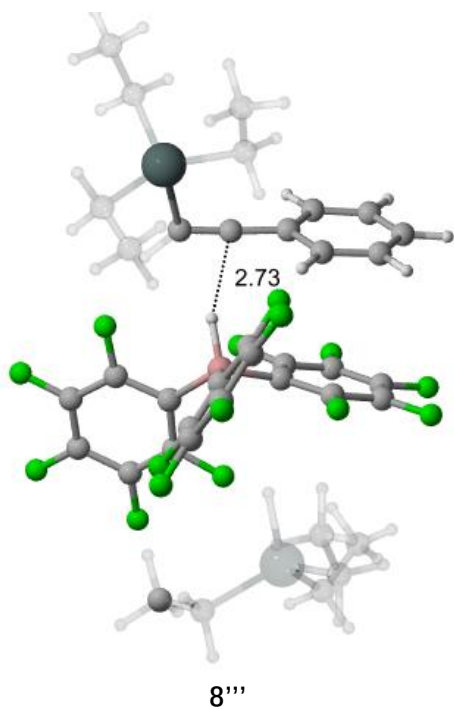

|   |            |             |             |   |             |             |             |
|---|------------|-------------|-------------|---|-------------|-------------|-------------|
| C | 5.16827700 | -3.15844900 | -0.13300500 | C | 0.75118900  | -0.77610300 | 1.06500500  |
| C | 4.18948100 | -3.19897200 | -1.11435800 | C | 1.09672800  | -2.13255300 | 1.07115600  |
| C | 3.34002500 | -2.07839100 | -1.29479400 | C | 1.35348100  | -0.04037800 | 2.08824000  |
| C | 3.49915500 | -0.91903500 | -0.49211700 | C | 1.93479200  | -2.73315400 | 2.00211800  |
| C | 4.50473000 | -0.88655000 | 0.46458200  | C | 2.20886300  | -0.59548700 | 3.03993400  |
| C | 5.32518800 | -2.00490500 | 0.65147500  | C | 2.50301700  | -1.95253600 | 3.00222900  |
| H | 5.80657600 | -4.01992400 | 0.03456600  | C | -0.49176400 | 1.39029100  | -0.12408000 |
|   |            |             |             | C | -1.72455400 | 2.00258900  | 0.10645400  |

|    |             |             |             |
|----|-------------|-------------|-------------|
| C  | 0.53647300  | 2.28760400  | -0.41266500 |
| C  | -1.91885700 | 3.38325300  | 0.08736900  |
| C  | 0.39698700  | 3.66833400  | -0.45005700 |
| C  | -0.85076900 | 4.22732900  | -0.19019300 |
| F  | -1.01818400 | 5.55961200  | -0.21017600 |
| F  | 1.44556900  | 4.46483900  | -0.73907000 |
| F  | 1.79070900  | 1.81383900  | -0.68082500 |
| F  | -2.82940300 | 1.26849600  | 0.37435000  |
| F  | -3.13105500 | 3.90719000  | 0.34785900  |
| F  | 0.62842000  | -2.94923200 | 0.08848800  |
| F  | 2.23781500  | -4.04418800 | 1.91984200  |
| F  | 3.34047700  | -2.49742800 | 3.90213000  |
| F  | 2.76287500  | 0.17607000  | 3.99436600  |
| F  | 1.15739000  | 1.29295000  | 2.20622600  |
| F  | -1.81354500 | -1.63568200 | 1.99249300  |
| F  | -4.02091800 | -3.07205300 | 1.57519700  |
| F  | -5.03153300 | -3.38489200 | -0.95222400 |
| F  | -3.73511300 | -2.21938000 | -3.07515600 |
| F  | -1.52087300 | -0.77754100 | -2.69037300 |
| H  | 0.45808700  | -0.39278900 | -1.15624300 |
| C  | -1.48149900 | 3.15329200  | 4.76874800  |
| H  | -2.19756000 | 3.57942300  | 5.48384400  |
| H  | -0.56170600 | 2.95148300  | 5.33332400  |
| C  | -1.19678800 | 4.15269100  | 3.63444200  |
| H  | -0.79708100 | 5.10294200  | 4.01505400  |
| H  | -0.46394700 | 3.74888800  | 2.92555700  |
| H  | -2.10448900 | 4.38920300  | 3.06470100  |
| C  | -1.92574500 | -0.33656200 | 5.44193800  |
| H  | -2.07247300 | 0.05237100  | 6.45831400  |
| H  | -2.70677000 | -1.09063600 | 5.28190000  |
| C  | -0.53656600 | -0.98246300 | 5.31024000  |
| H  | 0.26836900  | -0.25205800 | 5.46322100  |
| H  | -0.38805200 | -1.78701700 | 6.04412700  |
| H  | -0.39841400 | -1.41671900 | 4.31389000  |
| C  | -4.34476900 | 1.44300800  | 3.53674500  |
| H  | -4.89616100 | 1.67754800  | 4.45747300  |
| H  | -4.46466500 | 2.30909100  | 2.87350900  |
| C  | -4.92432200 | 0.18389100  | 2.87187400  |
| H  | -4.42527400 | -0.02524800 | 1.91995700  |
| H  | -4.80639600 | -0.70517100 | 3.50359100  |
| H  | -5.99718700 | 0.29376300  | 2.66110700  |
| Sn | -2.25125200 | 1.27085900  | 4.03343500  |
| H  | -1.35917600 | 0.91666800  | 2.61915700  |

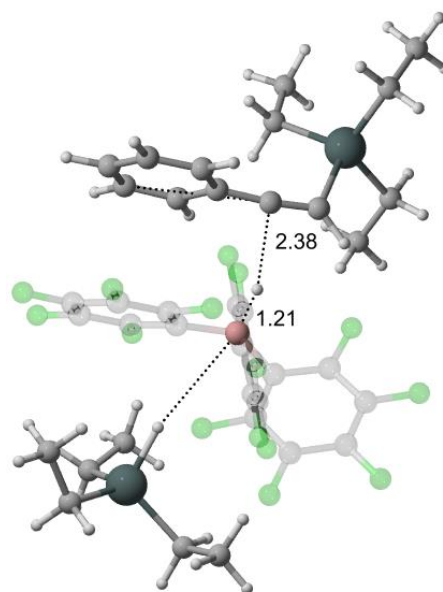

**TS6''**

|    |              |             |              |
|----|--------------|-------------|--------------|
| C  | -8.79209000  | -6.82574700 | -1.87026400  |
| C  | -9.66772400  | -6.49358500 | -2.89158400  |
| C  | -10.10399500 | -5.14936800 | -3.02879500  |
| C  | -9.64589200  | -4.15379400 | -2.12597300  |
| C  | -8.73927200  | -4.49919800 | -1.13389600  |
| C  | -8.32588200  | -5.82933500 | -0.99815400  |
| H  | -8.47604700  | -7.85513800 | -1.73706100  |
| H  | -10.04767700 | -7.24759600 | -3.57304300  |
| H  | -10.01861500 | -3.14357900 | -2.22117800  |
| H  | -8.38227900  | -3.74330200 | -0.44236200  |
| H  | -7.64556800  | -6.09876900 | -0.19524400  |
| C  | -11.01634900 | -4.81401600 | -4.02431100  |
| C  | -11.72153900 | -4.46841700 | -5.00583000  |
| Sn | -10.57870300 | -3.21160100 | -6.48847100  |
| C  | -10.01973800 | -4.55231200 | -8.07470900  |
| H  | -9.31481600  | -5.28483400 | -7.66332400  |
| H  | -10.91473000 | -5.11035100 | -8.37408200  |
| C  | -12.10832300 | -1.77437700 | -6.94826300  |
| H  | -11.71529100 | -1.12294700 | -7.73972800  |
| H  | -12.95790900 | -2.31614600 | -7.38101300  |
| C  | -8.94637200  | -2.38471900 | -5.36898000  |
| H  | -9.37879100  | -1.92028000 | -4.47593700  |
| H  | -8.30187000  | -3.20169900 | -5.02311300  |
| C  | -9.40494600  | -3.82415100 | -9.28312200  |
| H  | -8.48897800  | -3.28507400 | -9.01325500  |
| H  | -9.14126700  | -4.53422300 | -10.07694700 |
| H  | -10.10069200 | -3.09642400 | -9.71802700  |
| C  | -12.54333400 | -0.95238300 | -5.72484700  |

|   |              |             |             |    |              |             |            |
|---|--------------|-------------|-------------|----|--------------|-------------|------------|
| H | -13.31038700 | -0.21959900 | -6.00394600 | H  | -14.59437700 | 0.38402700  | 4.03196700 |
| H | -12.96924000 | -1.58471000 | -4.94028600 | H  | -13.03718700 | -0.37137700 | 3.71831700 |
| H | -11.70546000 | -0.39961000 | -5.28601800 | C  | -13.74950700 | 0.87551100  | 2.08382200 |
| C | -8.13217400  | -1.35224500 | -6.16805800 | H  | -13.24098600 | 1.79219700  | 2.41369900 |
| H | -7.66158400  | -1.79608200 | -7.05368800 | H  | -13.12603900 | 0.41565200  | 1.30800600 |
| H | -8.75699700  | -0.51719500 | -6.50742200 | H  | -14.69029400 | 1.18088600  | 1.60862600 |
| H | -7.33047400  | -0.92474400 | -5.55345600 | C  | -14.77560000 | -3.49926000 | 4.07361800 |
| H | -12.80131800 | -4.41824600 | -5.10841900 | H  | -14.79850600 | -3.06250900 | 5.08074100 |
| B | -13.24174300 | -3.34012300 | -1.71571000 | H  | -15.65884600 | -4.14619200 | 3.99594500 |
| C | -14.68020700 | -4.08296900 | -1.93007800 | C  | -13.49625100 | -4.32978700 | 3.87818200 |
| C | -15.26328500 | -4.08427200 | -3.19573200 | H  | -12.59385400 | -3.71115400 | 3.96580000 |
| C | -15.43400700 | -4.73978600 | -0.95678600 | H  | -13.41134200 | -5.13372400 | 4.62266500 |
| C | -16.48915400 | -4.66675100 | -3.49932400 | H  | -13.47646000 | -4.79638200 | 2.88640400 |
| C | -16.66527400 | -5.34169000 | -1.20635200 | C  | -17.05984400 | -1.53410100 | 2.18305700 |
| C | -17.20206800 | -5.30444400 | -2.48937500 | H  | -17.55926300 | -1.25860900 | 3.12196000 |
| C | -12.35408100 | -3.94222000 | -0.48694600 | H  | -17.11489600 | -0.65328100 | 1.53112200 |
| C | -12.14386500 | -5.32480100 | -0.42027300 | C  | -17.77635200 | -2.72449100 | 1.52515600 |
| C | -11.66241400 | -3.21725600 | 0.48621800  | H  | -17.32704200 | -2.97094800 | 0.55761700 |
| C | -11.36469100 | -5.95636700 | 0.53987600  | H  | -17.72635900 | -3.62782200 | 2.14586800 |
| C | -10.86371100 | -3.80536500 | 1.46535600  | H  | -18.83928200 | -2.51011200 | 1.34723400 |
| C | -10.71386400 | -5.18597100 | 1.49791200  | Sn | -14.98051800 | -1.91285700 | 2.61754100 |
| C | -13.40386600 | -1.71379200 | -1.74335800 | H  | -14.18141200 | -2.43244100 | 1.19812100 |
| C | -14.54909100 | -1.00779600 | -1.36843300 |    |              |             |            |
| C | -12.37534200 | -0.90116400 | -2.21796700 |    |              |             |            |
| C | -14.66085100 | 0.38042200  | -1.43072100 |    |              |             |            |
| C | -12.43586700 | 0.48358400  | -2.30670800 |    |              |             |            |
| C | -13.59525200 | 1.13757000  | -1.90265500 |    |              |             |            |
| F | -13.68309500 | 2.47567100  | -1.97267500 |    |              |             |            |
| F | -11.39379100 | 1.19276900  | -2.78766100 |    |              |             |            |
| F | -11.19944500 | -1.46108700 | -2.63579700 |    |              |             |            |
| F | -15.64445300 | -1.65540300 | -0.90995500 |    |              |             |            |
| F | -15.78954300 | 0.99515800  | -1.03285700 |    |              |             |            |
| F | -12.70496100 | -6.13225200 | -1.35687700 |    |              |             |            |
| F | -11.19948900 | -7.29419100 | 0.53264800  | C  | -0.97908000  | 2.03087700  | 5.23956500 |
| F | -9.93299300  | -5.76762100 | 2.42558000  | C  | -1.38192800  | 1.88829200  | 4.08466200 |
| F | -10.22571400 | -3.04645100 | 2.37760700  | C  | -0.40424300  | 2.14325700  | 6.53063100 |
| F | -11.71334700 | -1.86480400 | 0.51936800  | C  | 0.49642300   | 3.19349200  | 6.80819800 |
| F | -14.98902700 | -4.82117500 | 0.31935100  | C  | -0.71450300  | 1.19592200  | 7.52854600 |
| F | -17.34027500 | -5.96082700 | -0.22160500 | C  | 1.08120000   | 3.28480700  | 8.06742300 |
| F | -18.38645000 | -5.88166500 | -2.75164200 | H  | 0.72423500   | 3.91981800  | 6.03443200 |
| F | -16.98416100 | -4.62805400 | -4.75271700 | C  | -0.12547400  | 1.30046100  | 8.78461500 |
| F | -14.62136300 | -3.47638900 | -4.24230000 | H  | -1.40900400  | 0.39276100  | 7.30430100 |
| H | -12.58837900 | -3.62033500 | -2.69386500 | C  | 0.77239400   | 2.34010400  | 9.05316700 |
| C | -13.99185500 | -0.09753500 | 3.25039900  | H  | 1.77634900   | 4.09035200  | 8.28299600 |

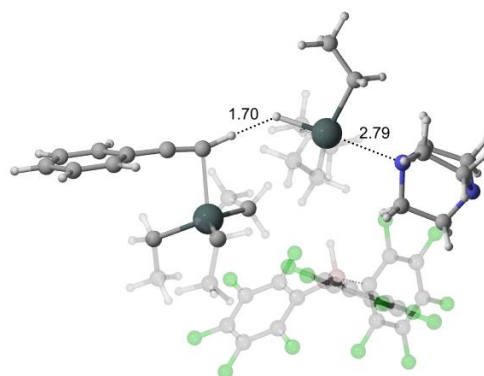

16

|   |             |             |             |    |             |             |             |
|---|-------------|-------------|-------------|----|-------------|-------------|-------------|
| H | -0.36173900 | 0.57206200  | 9.55414800  | H  | 3.13076700  | -1.25154600 | 4.06418700  |
| H | 1.23219000  | 2.41510900  | 10.03428400 | Sn | -2.89090800 | 2.16175900  | 0.05842600  |
| C | 1.86706300  | 2.23167800  | 2.84118100  | Sn | 0.57271500  | 0.60745900  | 3.35378000  |
| H | 1.72629300  | 2.98853700  | 3.62325300  | N  | -2.09367600 | 2.00129800  | -5.25923300 |
| H | 1.54262400  | 2.67069100  | 1.89764000  | C  | -3.41817100 | 1.44686900  | -4.94688000 |
| C | 3.33812000  | 1.79038700  | 2.76586400  | H  | -3.50319300 | 0.45930800  | -5.41265900 |
| H | 3.49805300  | 1.04605700  | 1.97973300  | H  | -4.17393000 | 2.09678600  | -5.40292000 |
| H | 3.97912600  | 2.64839300  | 2.53034800  | C  | -2.03590500 | 3.38558300  | -4.76872500 |
| H | 3.69043100  | 1.36599800  | 3.71387700  | H  | -2.70879500 | 4.00141600  | -5.37657000 |
| C | -1.35000800 | -1.73345300 | 2.89125700  | H  | -1.01663400 | 3.75595100  | -4.92479100 |
| H | -1.96043300 | -2.33673300 | 2.21100100  | C  | -1.07266200 | 1.20834700  | -4.55355900 |
| H | -0.62929800 | -2.40956100 | 3.36338300  | H  | -0.08587600 | 1.54403200  | -4.88565100 |
| H | -2.01234100 | -1.34546600 | 3.67469300  | H  | -1.18171500 | 0.16201800  | -4.85527800 |
| C | -0.65859000 | -0.61200600 | 2.11037800  | N  | -2.51144400 | 2.06949100  | -2.70733600 |
| H | -0.01871600 | -1.00565000 | 1.31947600  | C  | -2.43354500 | 3.44304700  | -3.26146600 |
| H | -1.38331600 | 0.04139100  | 1.62277500  | H  | -1.70596100 | 4.01250100  | -2.67354200 |
| H | -3.04684400 | 2.21146100  | 1.86440700  | H  | -3.41181100 | 3.91302500  | -3.12197000 |
| C | -4.43423700 | 3.58634900  | -0.45123100 | C  | -3.60756600 | 1.34744900  | -3.40322500 |
| H | -3.94767500 | 4.52696500  | -0.73959100 | H  | -4.56374700 | 1.77379300  | -3.08001000 |
| H | -4.95397800 | 3.22278900  | -1.34509300 | H  | -3.57282100 | 0.30610400  | -3.07855300 |
| C | -5.43960200 | 3.83402900  | 0.68299500  | C  | -1.23578500 | 1.36765400  | -3.01193300 |
| H | -6.20614800 | 4.56562400  | 0.39227400  | H  | -1.24242200 | 0.40544100  | -2.50046900 |
| H | -5.95954100 | 2.91133100  | 0.96938500  | H  | -0.42193000 | 1.96201500  | -2.59154000 |
| H | -4.94355100 | 4.21260800  | 1.58424300  | H  | -2.05608500 | 2.00262500  | 3.22465600  |
| C | -0.87187800 | 2.93981400  | 0.04705200  | B  | 0.73018900  | -1.56510800 | -1.46553000 |
| H | -0.56939800 | 3.21069000  | -0.96644700 | C  | 0.31279400  | -2.58101600 | -2.66730900 |
| H | -0.19825000 | 2.13445200  | 0.35626800  | C  | -0.97854200 | -2.66300500 | -3.18205900 |
| C | -3.38554700 | 0.07472500  | -0.20000100 | C  | 1.22514000  | -3.46629400 | -3.24240200 |
| H | -3.96655400 | -0.02037500 | -1.12017900 | C  | -1.35232600 | -3.54389400 | -4.19498300 |
| H | -2.47151700 | -0.50638400 | -0.36057000 | C  | 0.90158200  | -4.36790900 | -4.25068900 |
| C | -0.72145300 | 4.15647900  | 0.97147800  | C  | -0.40420000 | -4.40623600 | -4.73371800 |
| H | -0.98868100 | 3.92080900  | 2.00918000  | C  | 1.55585900  | -0.24006900 | -1.95646400 |
| H | 0.30896000  | 4.53710100  | 0.97395900  | C  | 1.89480400  | 0.10267700  | -3.26612900 |
| H | -1.37097100 | 4.98335900  | 0.65748800  | C  | 1.86000400  | 0.75150100  | -1.02549500 |
| C | -4.20058800 | -0.48763700 | 0.97343900  | C  | 2.46639200  | 1.32552500  | -3.62467700 |
| H | -3.68488500 | -0.36967600 | 1.93271000  | C  | 2.42650000  | 1.98134300  | -1.32451400 |
| H | -5.16790000 | 0.02133400  | 1.07111600  | C  | 2.73088200  | 2.27891100  | -2.64940900 |
| H | -4.40415500 | -1.55820900 | 0.83715500  | C  | 1.46512000  | -2.41792600 | -0.27439300 |
| C | 1.32196700  | -0.47098600 | 5.05214800  | C  | 2.79289400  | -2.31836800 | 0.14246100  |
| H | 1.83828400  | 0.22923000  | 5.71820700  | C  | 0.70221200  | -3.33801200 | 0.45084400  |
| H | 0.46795500  | -0.87063000 | 5.61115900  | C  | 3.32513100  | -3.04332800 | 1.20828700  |
| C | 2.25944400  | -1.61493100 | 4.62128900  | C  | 1.19059600  | -4.09084100 | 1.51493700  |
| H | 2.63818600  | -2.16209300 | 5.49283900  | C  | 2.51857900  | -3.93884600 | 1.90116900  |
| H | 1.74492400  | -2.34124500 | 3.98456500  | F  | 3.01076600  | -4.63750900 | 2.94061800  |

|   |             |             |             |   |             |             |             |
|---|-------------|-------------|-------------|---|-------------|-------------|-------------|
| F | 0.39194100  | -4.94103300 | 2.19115400  | H | 8.60316800  | 1.88408600  | -0.76445100 |
| F | -0.60438700 | -3.51833700 | 0.14055700  | H | 9.13419400  | 3.55642600  | -0.61239700 |
| F | 3.65531400  | -1.48361800 | -0.48459100 | H | 9.05731000  | 2.52888600  | 0.82450100  |
| F | 4.60911900  | -2.87872800 | 1.58341700  | C | 4.50335800  | -0.99318000 | 1.02749800  |
| F | 1.65519800  | -0.74229400 | -4.29484300 | H | 4.11460300  | -1.86556500 | 0.49136200  |
| F | 2.74636700  | 1.59931600  | -4.91185700 | H | 5.15550200  | -1.36305100 | 1.82731400  |
| F | 3.26796500  | 3.46724100  | -2.97544500 | H | 3.64656500  | -0.49709300 | 1.49915800  |
| F | 2.67658300  | 2.89054800  | -0.35679600 | C | 5.25291200  | -0.05599900 | 0.07175800  |
| F | 1.58449800  | 0.52938900  | 0.29581200  | H | 6.14215100  | -0.54445600 | -0.33713300 |
| F | 2.51641100  | -3.45050900 | -2.83249300 | H | 4.64028300  | 0.21447300  | -0.79141700 |
| F | 1.82875100  | -5.19375100 | -4.77003500 | H | 2.65516300  | 3.33786200  | -0.45410100 |
| F | -0.74328800 | -5.26645800 | -5.70890400 | C | 0.71655200  | 4.41677000  | -2.43303700 |
| F | -2.61944400 | -3.56878100 | -4.65541900 | H | 1.08001700  | 5.38101300  | -2.81129500 |
| F | -1.96588900 | -1.85377900 | -2.71229100 | H | 0.01876500  | 4.03246800  | -3.18636900 |
| H | -0.28925800 | -1.12672900 | -0.97466800 | C | -0.00939200 | 4.61164000  | -1.09383900 |

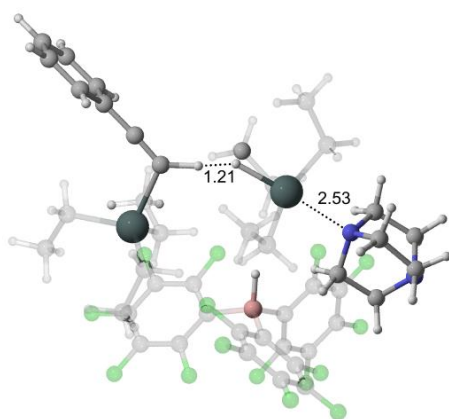

### TS14

|   |            |            |             |    |            |             |             |
|---|------------|------------|-------------|----|------------|-------------|-------------|
| C | 3.62013900 | 2.64837200 | 2.68130300  | H  | 3.89832600 | 5.99727700  | -2.12340600 |
| C | 3.94159700 | 2.71546600 | 1.48006700  | C  | 1.57960300 | 0.60447100  | -0.61824700 |
| C | 3.31881000 | 2.50387500 | 4.04947500  | H  | 2.35419200 | 0.86170700  | 0.10965700  |
| C | 3.60728800 | 3.54418700 | 4.96194600  | H  | 0.66581200 | 1.12869000  | -0.31163000 |
| C | 2.73739200 | 1.30129900 | 4.51455800  | H  | 1.39131000 | -0.47339300 | -0.52945800 |
| C | 3.31925100 | 3.37817000 | 6.31209800  | C  | 6.70254000 | 1.19375100  | 2.99665500  |
| H | 4.05308500 | 4.46325900 | 4.59520000  | H  | 7.03919700 | 2.10434800  | 3.50737500  |
| C | 2.45633300 | 1.14774600 | 5.86746500  | H  | 5.88048400 | 0.78485100  | 3.59655100  |
| H | 2.52083200 | 0.50850100 | 3.80563700  | C  | 7.84957300 | 0.17061300  | 2.90116300  |
| C | 2.74634600 | 2.18306700 | 6.76477300  | H  | 8.21347200 | -0.11404200 | 3.89656400  |
| H | 3.54046400 | 4.17579900 | 7.01471700  | H  | 7.53293900 | -0.75045400 | 2.39721600  |
| H | 2.01257300 | 0.22412300 | 6.22624400  | H  | 8.70684500 | 0.56698900  | 2.34453400  |
| H | 2.52554200 | 2.05791300 | 7.82092600  | Sn | 2.40561800 | 3.06990700  | -2.31692300 |
| C | 7.10202000 | 3.22834900 | 0.10103000  | Sn | 5.92375200 | 1.71584300  | 1.05983200  |
| H | 7.06652800 | 4.11843900 | 0.74110000  | N  | 2.13035300 | 2.38794900  | -7.37632300 |
| H | 6.63874900 | 3.49466000 | -0.84989400 | C  | 0.91007400 | 1.86328400  | -6.75065300 |
| C | 8.55292100 | 2.76768000 | -0.11962100 | H  | 0.76687100 | 0.82756500  | -7.07435000 |



|   |            |            |             |   |            |             |             |
|---|------------|------------|-------------|---|------------|-------------|-------------|
| H | 0.06008000 | 2.44933200 | -7.11771500 | F | 8.02147000 | 3.91335900  | -5.95362300 |
| C | 2.24876200 | 3.81628300 | -7.05868300 | F | 7.72247400 | 3.46165800  | -3.26501600 |
| H | 1.45045800 | 4.35963800 | -7.57632000 | F | 6.56169500 | 1.20776300  | -2.38948500 |
| H | 3.20476000 | 4.17308600 | -7.45627300 | F | 6.86906900 | -2.89629200 | -5.54401300 |
| C | 3.29147200 | 1.67944200 | -6.81460400 | F | 5.80431200 | -4.62638600 | -7.31512500 |
| H | 4.18610800 | 1.98506100 | -7.36472800 | F | 3.11614000 | -4.58461600 | -7.83750200 |
| H | 3.15452100 | 0.60742100 | -6.98097700 | F | 1.50996400 | -2.78436000 | -6.53249100 |
| N | 2.22673600 | 2.73056300 | -4.81639500 | F | 2.53889400 | -1.08757600 | -4.74660400 |
| C | 2.16301100 | 4.04255000 | -5.51860000 | H | 4.50941100 | -0.39838500 | -3.32648100 |

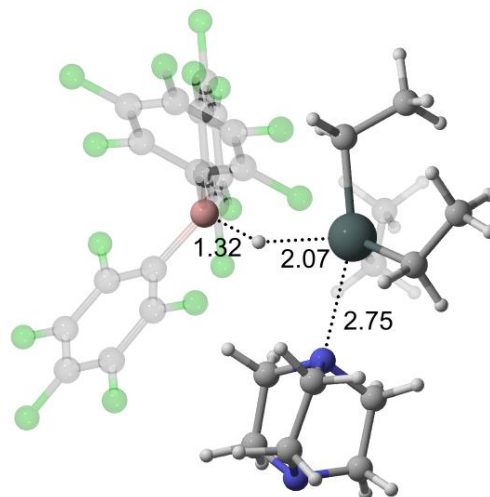

**TS12**

|   |            |             |             |   |             |             |             |
|---|------------|-------------|-------------|---|-------------|-------------|-------------|
| C | 4.76383600 | -1.91609400 | -5.05242600 | B | 0.20442700  | -0.08067100 | 0.27836800  |
| C | 3.40555100 | -1.94592900 | -5.35412100 | C | -0.51829600 | 1.29662900  | 0.73940400  |
| C | 5.53142100 | -2.85332000 | -5.74581300 | C | -0.61233200 | 2.47050900  | 0.00208300  |
| C | 2.83473000 | -2.81822000 | -6.27860900 | C | -1.02147700 | 1.38693900  | 2.04007800  |
| C | 5.01062700 | -3.75045300 | -6.67224200 | C | -1.18797000 | 3.64524800  | 0.48021400  |
| C | 3.64442600 | -3.73118500 | -6.94393400 | C | -1.60325200 | 2.53371100  | 2.56708500  |
| C | 6.24074700 | 0.35275100  | -4.58848200 | C | -1.69243400 | 3.67700200  | 1.77506700  |
| C | 6.43516200 | 0.63205000  | -5.94173900 | C | 1.51056800  | -0.29314800 | 1.23206000  |
| C | 6.70559900 | 1.35647100  | -3.73725000 | C | 1.77824100  | -1.40067900 | 2.04291100  |
| C | 7.02320500 | 1.80641000  | -6.41633700 | C | 2.46214500  | 0.72751600  | 1.32960100  |
| C | 7.30532900 | 2.53617100  | -4.15538100 | C | 2.92240700  | -1.51772600 | 2.83277200  |
| C | 7.46146600 | 2.77120300  | -5.51818400 | C | 3.62047700  | 0.65309400  | 2.09402900  |
| C | 6.25702800 | -1.78746100 | -2.85754600 | C | 3.85857800  | -0.48943000 | 2.85227400  |
| C | 7.63258300 | -1.76004300 | -2.63213000 | C | -0.76658500 | -1.37315300 | 0.10412000  |
| C | 5.55065500 | -2.64564200 | -2.01118500 | C | -2.14232700 | -1.41274200 | 0.34729200  |
| C | 8.26511700 | -2.48943700 | -1.62520400 | C | -0.24576700 | -2.56906900 | -0.39418200 |
| C | 6.13814100 | -3.40746900 | -1.00638100 | C | -2.93071600 | -2.54339300 | 0.13224700  |
| C | 7.51167200 | -3.31904900 | -0.80173400 | C | -0.98758800 | -3.71785600 | -0.63319200 |
| F | 8.10189800 | -4.02786500 | 0.17802900  | C | -2.35292500 | -3.70669800 | -0.36335900 |
| F | 5.39416100 | -4.20208800 | -0.20998600 | F | -2.08148600 | 2.55186700  | 3.82082100  |
| F | 4.20272300 | -2.74265600 | -2.12533400 | F | -0.95754800 | 0.30492400  | 2.84800000  |
| F | 8.44447500 | -0.99304600 | -3.39852800 |   |             |             |             |
| F | 9.59684000 | -2.40125500 | -1.44122500 |   |             |             |             |
| F | 6.02313200 | -0.22974500 | -6.90137600 |   |             |             |             |
| F | 7.15397300 | 2.02160700  | -7.73885800 |   |             |             |             |

|    |             |             |             |   |             |             |             |
|----|-------------|-------------|-------------|---|-------------|-------------|-------------|
| F  | -2.25086000 | 4.79512300  | 2.25855800  | H | -0.68286600 | 2.12546500  | -5.42696500 |
| F  | -1.24713300 | 4.74335700  | -0.29357200 | C | -0.55018400 | -2.59811700 | -4.20138200 |
| F  | -0.10235200 | 2.53729400  | -1.25960000 | H | -1.22436300 | -2.06746400 | -4.88244300 |
| F  | 2.28983400  | 1.87622100  | 0.62728700  | H | -0.30287800 | -3.55941700 | -4.66940200 |
| F  | 4.50734600  | 1.66373600  | 2.10049000  | H | -1.11452300 | -2.81903300 | -3.29038700 |
| F  | 4.96613900  | -0.59035100 | 3.59812100  | C | -1.76741300 | 0.12163200  | -2.57519500 |
| F  | 3.12525200  | -2.61375500 | 3.57950500  | H | -2.01005000 | -0.89584800 | -2.26087300 |
| F  | 0.91668200  | -2.43498700 | 2.11926700  | H | -1.99978100 | 0.77237000  | -1.72929900 |
| F  | 1.07803000  | -2.64404400 | -0.68449800 | C | -2.63493100 | 0.49378800  | -3.79012000 |
| F  | -0.40541200 | -4.82519900 | -1.12385100 | H | -2.34354500 | -0.04326100 | -4.70180300 |
| F  | -3.09826400 | -4.79657400 | -0.58722900 | H | -3.68606000 | 0.24132600  | -3.59775200 |
| F  | -4.24995000 | -2.50914100 | 0.37743400  | H | -2.59280900 | 1.56268500  | -4.01190100 |
| F  | -2.81319200 | -0.32064700 | 0.77057100  |   |             |             |             |
| H  | 0.70461400  | 0.11545200  | -0.93034400 |   |             |             |             |
| N  | 3.08990200  | -0.02550100 | -2.60975800 |   |             |             |             |
| C  | 3.76205400  | -0.39152500 | -3.88683200 |   |             |             |             |
| H  | 3.40976700  | 0.28061500  | -4.67468700 |   |             |             |             |
| H  | 3.45208300  | -1.40608100 | -4.14646600 |   |             |             |             |
| C  | 3.45935100  | -1.06125800 | -1.60615400 |   |             |             |             |
| H  | 2.99537300  | -2.00160900 | -1.90512800 |   |             |             |             |
| H  | 3.02318400  | -0.77120300 | -0.65339200 |   |             |             |             |
| C  | 3.63677400  | 1.29324600  | -2.17893200 |   |             |             |             |
| H  | 3.04925400  | 1.65872900  | -1.33869400 |   |             |             |             |
| H  | 3.49985300  | 1.98506100  | -3.01206000 |   |             |             |             |
| N  | 5.66266900  | -0.13625800 | -2.29051900 |   |             |             |             |
| C  | 5.00815200  | -1.19822800 | -1.51484200 | B | 0.12218400  | -0.04558100 | 1.30028100  |
| H  | 5.34433800  | -1.12962000 | -0.47475400 | C | -0.78922100 | 1.23426600  | 1.74421900  |
| H  | 5.34417000  | -2.16425700 | -1.90715600 | C | -0.71440100 | 2.48138100  | 1.13120900  |
| C  | 5.31184900  | -0.30336700 | -3.70730600 | C | -1.66710400 | 1.17711800  | 2.82895000  |
| H  | 5.79627400  | -1.21056100 | -4.08431800 | C | -1.45966300 | 3.59007300  | 1.52808400  |
| H  | 5.72502100  | 0.54695100  | -4.26052500 | C | -2.43049900 | 2.25319700  | 3.26826200  |
| C  | 5.14542100  | 1.15814600  | -1.82374400 | C | -2.32724000 | 3.47575000  | 2.60760900  |
| H  | 5.72752700  | 1.96114600  | -2.28895800 | C | 1.16714100  | -0.35357200 | 2.51931200  |
| H  | 5.30636100  | 1.21919300  | -0.74246200 | C | 1.04242500  | -1.35488500 | 3.48341200  |
| Sn | 0.37132700  | 0.12327500  | -2.97092400 | C | 2.29005600  | 0.46050900  | 2.67538200  |
| C  | 0.97204100  | 1.92915300  | -3.98961000 | C | 1.95912200  | -1.54912000 | 4.51549700  |
| H  | 1.46024500  | 2.56461700  | -3.24730500 | C | 3.23291400  | 0.30753400  | 3.68711200  |
| H  | 1.73646600  | 1.64804500  | -4.72216800 | C | 3.06540600  | -0.71195200 | 4.61921600  |
| C  | 0.72513200  | -1.79677100 | -3.90541200 | C | -0.71246800 | -1.35904800 | 0.78558200  |
| H  | 1.27301600  | -1.59519600 | -4.83376100 | C | -2.07437100 | -1.40217900 | 0.47880600  |
| H  | 1.39362600  | -2.38020100 | -3.26715800 | C | -0.03927100 | -2.55393800 | 0.51051300  |
| C  | -0.15857100 | 2.71448700  | -4.66662400 | C | -2.72423600 | -2.52843100 | -0.02681700 |
| H  | -0.89785500 | 3.05789700  | -3.93685600 | C | -0.64125700 | -3.70469100 | 0.01407600  |
| H  | 0.24485100  | 3.60565100  | -5.16514700 | C | -2.00541900 | -3.69458500 | -0.25757100 |

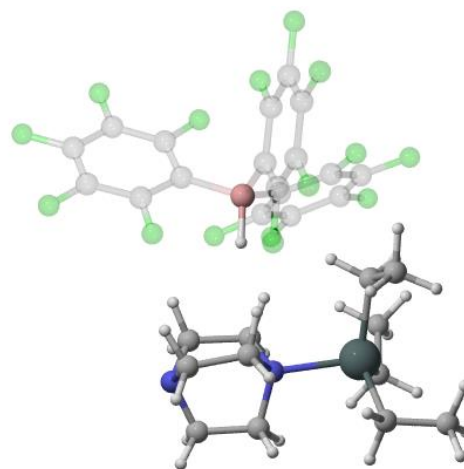

14



|   |             |             |             |    |             |             |             |
|---|-------------|-------------|-------------|----|-------------|-------------|-------------|
| H | 2.35377300  | 4.21243100  | 2.00102700  | F  | 5.26241900  | -0.32661000 | 1.07362000  |
| H | 1.13147500  | 5.02859400  | 2.98785800  | F  | 5.27142900  | -0.72057100 | -2.16238300 |
| C | 0.41523500  | 3.00577300  | 4.43422300  | F  | 7.21729400  | 0.99313800  | -2.86889700 |
| H | 0.24857900  | 3.95899600  | 4.94617800  | F  | 7.05835100  | 3.63486700  | -2.16953200 |
| H | 0.57240400  | 2.23943700  | 5.19955500  | F  | 4.88796800  | 4.53140700  | -0.74737700 |
| C | -3.71263800 | -0.96099200 | -2.22812200 | F  | 2.93189900  | 2.84792600  | -0.04912100 |
| C | -4.31109200 | 0.06417700  | -1.97319100 | F  | 3.35269700  | -2.97365300 | -1.09982400 |
| C | -4.99772400 | 1.27859200  | -1.66763400 | F  | 2.61426500  | -4.42854500 | -3.22090600 |
| C | -4.71233400 | 2.45899800  | -2.38294800 | F  | 1.22448100  | -3.28533500 | -5.28088400 |
| H | -3.96668200 | 2.43022000  | -3.17077800 | F  | 0.59666400  | -0.61759100 | -5.17506500 |
| C | -5.38982600 | 3.64124200  | -2.08858900 | F  | 1.35557700  | 0.87152500  | -3.07318100 |
| H | -5.16343500 | 4.54386200  | -2.64936100 | C  | 2.95881500  | -0.83163600 | 0.69016500  |
| C | -6.36238200 | 3.66595400  | -1.08297900 | C  | 1.85485900  | -1.48207200 | 1.24100000  |
| H | -6.89179600 | 4.58777100  | -0.85943700 | C  | 1.85289500  | -2.14855600 | 2.45895000  |
| C | -6.65492700 | 2.49832500  | -0.37143800 | C  | 3.02691100  | -2.19353100 | 3.20507800  |
| H | -7.41295700 | 2.51096600  | 0.40673200  | C  | 4.16417800  | -1.56772100 | 2.70488900  |
| C | -5.97916200 | 1.31285500  | -0.65683600 | C  | 4.11027000  | -0.90876200 | 1.47477400  |
| H | -6.20952400 | 0.40180300  | -0.11357200 | C  | 3.99232200  | 0.97881500  | -1.09947400 |
| H | -3.17079000 | -1.88739600 | -2.41638600 | C  | 5.12298200  | 0.57709700  | -1.81275900 |
| N | -2.11004200 | -3.54972800 | -2.09468300 | C  | 6.15149500  | 1.43985300  | -2.18164000 |
| C | -1.03191400 | -2.98805500 | -1.25698800 | C  | 6.07739700  | 2.78432400  | -1.82581200 |
| H | -1.49281700 | -2.31419900 | -0.52636900 | C  | 4.97590700  | 3.23412300  | -1.10643100 |
| H | -0.38193100 | -2.38273000 | -1.89599800 | C  | 3.97411600  | 2.32984600  | -0.76703200 |
| C | -1.51585400 | -4.42626600 | -3.12286600 | C  | 2.36912900  | -0.97940600 | -1.96674900 |
| H | -0.88526300 | -3.81146700 | -3.77207900 | C  | 2.66782300  | -2.33699600 | -2.07891100 |
| H | -2.33135800 | -4.82593400 | -3.73668600 | C  | 2.30234700  | -3.11895800 | -3.17243700 |
| C | -3.00784000 | -4.35082600 | -1.24099600 | C  | 1.59808300  | -2.54238400 | -4.22365900 |
| H | -3.82264200 | -4.73035300 | -1.86894400 | C  | 1.28086800  | -1.18897000 | -4.16559600 |
| H | -3.44985100 | -3.67914000 | -0.49440700 | C  | 1.67532200  | -0.44775300 | -3.05528500 |
| N | -0.79197200 | -5.44395200 | -0.96784100 | H  | 1.79520800  | 0.69659800  | -0.52898900 |
| C | -0.69789500 | -5.56665200 | -2.43258800 | Sn | -1.99810200 | 1.57969800  | 0.85155000  |
| H | -1.07587200 | -6.55561500 | -2.71635400 | C  | -3.41537400 | 3.14432500  | 1.24038200  |
| H | 0.35935000  | -5.52412100 | -2.71013100 | H  | -2.84903600 | 4.07107300  | 1.40211200  |
| C | -0.24474300 | -4.14064000 | -0.55756200 | H  | -3.97939700 | 3.29757500  | 0.31582800  |
| H | 0.81677800  | -4.11498700 | -0.81920700 | C  | -4.37782400 | 2.88722000  | 2.40903000  |
| H | -0.31627500 | -4.06752400 | 0.53271700  | H  | -5.06354900 | 3.73312400  | 2.54424200  |
| C | -2.20511900 | -5.51132500 | -0.56943500 | H  | -4.99279800 | 1.99998000  | 2.22982800  |
| H | -2.25488400 | -5.45134500 | 0.52414100  | H  | -3.85256000 | 2.73652700  | 3.35973100  |
| H | -2.59761100 | -6.49087800 | -0.86626500 | C  | -2.35817700 | -0.28758200 | 1.85117000  |
| B | 2.76068600  | -0.01256400 | -0.71021700 | H  | -2.23058100 | -0.11828700 | 2.92794600  |
| F | 0.66338000  | -1.44744200 | 0.57884600  | H  | -1.55608500 | -0.96744800 | 1.54740600  |
| F | 0.72553400  | -2.72303000 | 2.93248900  | C  | -3.73196600 | -0.92246200 | 1.58041300  |
| F | 3.05576200  | -2.82093700 | 4.39271300  | H  | -3.88705500 | -1.11485000 | 0.51493300  |
| F | 5.30342000  | -1.59809400 | 3.41777800  | H  | -3.81992500 | -1.88040700 | 2.10792000  |

|   |             |             |             |
|---|-------------|-------------|-------------|
| H | -4.55171800 | -0.28294400 | 1.92633900  |
| C | -1.10206100 | 1.55274600  | -1.08210100 |
| H | -1.68855000 | 0.82943000  | -1.65834300 |
| H | -0.10026100 | 1.12545500  | -0.98088200 |
| C | -1.04702000 | 2.90315700  | -1.81007500 |
| H | -0.38436300 | 3.61747700  | -1.30971400 |
| H | -0.65570800 | 2.76211100  | -2.82402700 |
| H | -2.03551100 | 3.36825300  | -1.89301900 |

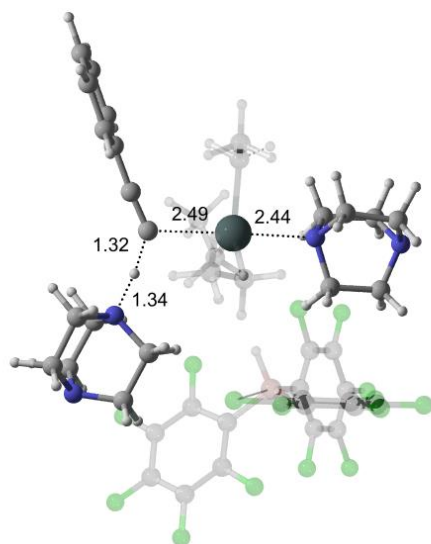

**TS13**

|   |             |             |             |
|---|-------------|-------------|-------------|
| N | -0.10140100 | 2.47400100  | 1.69751300  |
| C | 0.26797000  | 3.69441300  | 0.91404900  |
| H | -0.64713000 | 4.26682800  | 0.73565000  |
| H | 0.65708400  | 3.36417900  | -0.04808300 |
| C | 1.12212200  | 1.62649800  | 1.87149000  |
| H | 1.39461000  | 1.22145200  | 0.89955400  |
| H | 0.84931400  | 0.79009000  | 2.51789900  |
| C | -0.55727100 | 2.91027600  | 3.05003000  |
| H | -0.90533100 | 2.02668900  | 3.59240500  |
| H | -1.41085800 | 3.57890000  | 2.91506800  |
| N | 1.76438700  | 3.79828200  | 2.89597400  |
| C | 2.26691900  | 2.47664300  | 2.49280700  |
| H | 2.68927700  | 1.98108000  | 3.37155800  |
| H | 3.07841400  | 2.62015100  | 1.77506500  |
| C | 1.32770200  | 4.52355300  | 1.69746900  |
| H | 2.20215000  | 4.71677800  | 1.06891000  |
| H | 0.92012800  | 5.49064100  | 2.01172300  |
| C | 0.61756800  | 3.61844400  | 3.79239600  |
| H | 0.30456300  | 4.60044400  | 4.16320100  |
| H | 0.94854400  | 3.02837700  | 4.65318000  |
| C | -3.47126700 | -0.05868000 | -0.83815200 |

|   |             |             |             |
|---|-------------|-------------|-------------|
| C | -4.60594400 | 0.42327000  | -0.91181500 |
| C | -5.88289400 | 1.05012300  | -0.95190600 |
| C | -6.12680200 | 2.10924500  | -1.85071700 |
| H | -5.33295100 | 2.42772800  | -2.51952900 |
| C | -7.37042400 | 2.73628700  | -1.87490500 |
| H | -7.54961000 | 3.55242700  | -2.56902200 |
| C | -8.38580700 | 2.31657400  | -1.00870300 |
| H | -9.35463600 | 2.80753300  | -1.02982900 |
| C | -8.15479400 | 1.26426600  | -0.11597100 |
| H | -8.94319900 | 0.93775200  | 0.55621300  |
| C | -6.91335600 | 0.63357500  | -0.08411200 |
| H | -6.72412900 | -0.18160300 | 0.60760800  |
| H | -2.77546400 | -1.06086200 | -1.33411000 |
| N | -2.26320600 | -2.17865800 | -1.86880100 |
| C | -1.08304100 | -2.63084100 | -1.08852800 |
| H | -1.39334800 | -2.73058000 | -0.04699600 |
| H | -0.32161500 | -1.85112600 | -1.14350200 |
| C | -1.87509500 | -1.99169200 | -3.29046900 |
| H | -1.07480600 | -1.24754900 | -3.32157700 |
| H | -2.74180600 | -1.58630500 | -3.82222100 |
| C | -3.34937000 | -3.18731900 | -1.77051700 |
| H | -4.20382900 | -2.80361000 | -2.33679900 |
| H | -3.64478100 | -3.24754400 | -0.71853500 |
| N | -1.44242100 | -4.39774100 | -2.80446700 |
| C | -1.41023000 | -3.37207000 | -3.85653600 |
| H | -2.06213900 | -3.69968800 | -4.67284800 |
| H | -0.39484600 | -3.30453100 | -4.25109900 |
| C | -0.58208900 | -3.98096200 | -1.68624400 |
| H | 0.44046500  | -3.88381200 | -2.05193600 |
| H | -0.58893700 | -4.76938900 | -0.92805200 |
| C | -2.81998800 | -4.54590500 | -2.32212200 |
| H | -2.83127900 | -5.31476800 | -1.54305500 |
| H | -3.44225700 | -4.90096300 | -3.15008900 |
| B | 2.76333200  | -0.77617400 | -0.42712800 |
| F | 1.00612000  | -2.71159500 | 0.81971900  |
| F | 0.72518500  | -3.21764700 | 3.42510300  |
| F | 2.36007000  | -1.99411200 | 5.26539700  |
| F | 4.28780700  | -0.25129800 | 4.39309800  |
| F | 4.58220400  | 0.28119600  | 1.81057600  |
| F | 5.59230000  | -1.47247700 | -0.78217700 |
| F | 7.56464800  | 0.15536700  | -1.60986500 |
| F | 7.05100800  | 2.79534400  | -2.13165900 |
| F | 4.50312600  | 3.76445600  | -1.81279700 |
| F | 2.52953900  | 2.16669300  | -1.01512300 |

|    |             |             |             |   |             |             |             |
|----|-------------|-------------|-------------|---|-------------|-------------|-------------|
| F  | 3.77601500  | -3.64000800 | -0.05577000 | H | -0.78273300 | 2.42012400  | -3.26833000 |
| F  | 3.79786200  | -5.52129000 | -1.95758700 | H | -2.37670700 | 2.19297100  | -2.53055300 |
| F  | 2.82864900  | -4.98223900 | -4.46277400 |   |             |             |             |
| F  | 1.79953800  | -2.50138000 | -5.00945500 |   |             |             |             |
| F  | 1.73175000  | -0.61095700 | -3.10947400 |   |             |             |             |
| C  | 2.81048800  | -1.19368800 | 1.15562900  |   |             |             |             |
| C  | 1.86116500  | -2.07982200 | 1.66883900  |   |             |             |             |
| C  | 1.68764800  | -2.36661800 | 3.01662400  |   |             |             |             |
| C  | 2.51133700  | -1.74817800 | 3.95276400  |   |             |             |             |
| C  | 3.48876800  | -0.86935500 | 3.50281300  |   |             |             |             |
| C  | 3.61885800  | -0.61528400 | 2.13606900  |   |             |             |             |
| C  | 3.95630200  | 0.24658500  | -0.88366200 |   |             |             |             |
| C  | 5.27344400  | -0.18658100 | -1.05539700 |   |             |             |             |
| C  | 6.31651500  | 0.63564600  | -1.46895200 |   |             |             |             |
| C  | 6.06174800  | 1.97941600  | -1.73230300 |   |             |             |             |
| C  | 4.76936700  | 2.46423500  | -1.57233000 |   |             |             |             |
| C  | 3.76077800  | 1.59572400  | -1.16122700 | C | 4.28712700  | 0.10664000  | -1.21822300 |
| C  | 2.75885300  | -2.02485100 | -1.48340900 | C | 4.91185600  | 1.13536300  | -0.97140100 |
| C  | 3.26848500  | -3.30480600 | -1.26199800 | C | 3.52148900  | -1.06886500 | -1.48221800 |
| C  | 3.30034700  | -4.30334700 | -2.23537400 | C | 3.61882700  | -2.19150100 | -0.63410300 |
| C  | 2.81209400  | -4.03535100 | -3.51038700 | C | 2.65880100  | -1.11377600 | -2.59501500 |
| C  | 2.29343400  | -2.77312000 | -3.78188600 | C | 2.86003600  | -3.32975100 | -0.89490100 |
| C  | 2.26947200  | -1.81389600 | -2.77402400 | H | 4.29329700  | -2.16016200 | 0.21681000  |
| H  | 1.69869600  | -0.21248000 | -0.56460300 | C | 1.91365200  | -2.26165800 | -2.85296700 |
| Sn | -1.80706900 | 1.22295900  | 0.49046700  | H | 2.56208800  | -0.24567700 | -3.23801500 |
| C  | -3.25749500 | 2.75115000  | 0.94549800  | C | 2.00893400  | -3.36784300 | -2.00523400 |
| H  | -2.74521900 | 3.69084800  | 1.17870400  | H | 2.93240000  | -4.18941800 | -0.23504200 |
| H  | -3.82302900 | 2.93055400  | 0.02532400  | H | 1.23933000  | -2.27709800 | -3.70278400 |
| C  | -4.21337600 | 2.36688700  | 2.08440100  | H | 1.41431300  | -4.25491600 | -2.20231200 |
| H  | -4.96497600 | 3.14830600  | 2.25718000  | C | 5.28613000  | 4.33357500  | -2.02805700 |
| H  | -4.75428000 | 1.44306300  | 1.85570300  | H | 5.31470800  | 4.14639000  | -3.10813400 |
| H  | -3.67998200 | 2.20927600  | 3.03008400  | H | 5.85481800  | 5.25620100  | -1.85793900 |
| C  | -1.56951700 | -0.41164800 | 1.87980800  | C | 3.83251200  | 4.50490400  | -1.56185700 |
| H  | -1.20470900 | 0.01401500  | 2.82050100  | H | 3.77595100  | 4.73358500  | -0.48870400 |
| H  | -0.75557500 | -1.03413700 | 1.49579300  | H | 3.33298100  | 5.32670300  | -2.08961900 |
| C  | -2.81219800 | -1.26548200 | 2.16025700  | H | 3.24769400  | 3.59592100  | -1.74572800 |
| H  | -3.22391100 | -1.70260500 | 1.24564300  | C | 7.52686200  | 1.31102400  | -3.53377600 |
| H  | -2.56827300 | -2.08559100 | 2.84771500  | H | 8.38477100  | 0.90146200  | -4.08167500 |
| H  | -3.61388600 | -0.67467100 | 2.61756500  | H | 6.80879400  | 0.49609200  | -3.38710700 |
| C  | -0.72096200 | 1.37269200  | -1.35657600 | H | 7.05169200  | 2.05579000  | -4.18398700 |
| H  | -0.75241500 | 0.37963200  | -1.81150000 | C | 7.96473300  | 1.92206500  | -2.19337600 |
| H  | 0.33381100  | 1.57469500  | -1.17149700 | H | 8.46708300  | 1.16976300  | -1.57301400 |
| C  | -1.32375600 | 2.40987200  | -2.31353900 | H | 8.68933500  | 2.73077400  | -2.35274300 |
| H  | -1.27339600 | 3.42559700  | -1.90170300 | H | 3.39421700  | 1.37240600  | 0.40492200  |

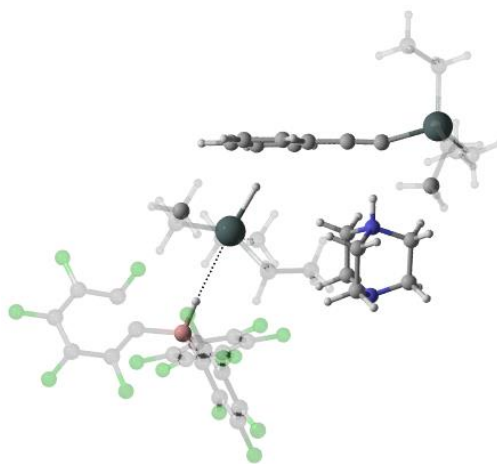

17

|    |             |             |             |   |             |             |             |
|----|-------------|-------------|-------------|---|-------------|-------------|-------------|
| H  | 0.08332400  | 0.21517800  | -3.64593100 | H | 1.81777900  | 0.39928300  | 4.01106000  |
| C  | 6.84680700  | 3.14903700  | 0.98730600  | C | 2.25368300  | 2.86820000  | 3.21060800  |
| H  | 6.03751000  | 3.72994100  | 1.44716800  | H | 2.66650000  | 2.63301200  | 4.19579200  |
| H  | 7.72061100  | 3.81244600  | 0.97489700  | H | 1.96889600  | 3.92404800  | 3.21019200  |
| C  | 7.15264800  | 1.88848300  | 1.81227100  | C | 0.44530500  | 2.39531000  | 1.70454300  |
| H  | 7.38206100  | 2.13260900  | 2.85765700  | H | 0.15144800  | 3.44806300  | 1.71697300  |
| H  | 6.31033200  | 1.18449700  | 1.81045600  | H | -0.46037300 | 1.80042000  | 1.58184200  |
| H  | 8.01593300  | 1.34549900  | 1.40971400  | B | -4.96458300 | -0.27523500 | -1.03276000 |
| C  | -2.77070800 | -0.77398400 | -4.51638000 | C | -5.89671400 | -1.36849600 | -1.80208400 |
| H  | -2.41096500 | -1.77911500 | -4.77140900 | C | -5.32521000 | -2.52205200 | -2.34032800 |
| H  | -3.77413300 | -0.89588500 | -4.09936900 | C | -7.26978600 | -1.25278800 | -2.01762100 |
| C  | -2.81666400 | 0.12156500  | -5.76312800 | C | -6.03134500 | -3.48281100 | -3.05597100 |
| H  | -3.45232400 | -0.31418900 | -6.54595400 | C | -8.02184300 | -2.18625000 | -2.72909600 |
| H  | -3.22930900 | 1.10978500  | -5.52796200 | C | -7.39701100 | -3.31035300 | -3.25788300 |
| H  | -1.81936900 | 0.27200200  | -6.19746200 | C | -4.49822000 | -0.74343700 | 0.46320700  |
| C  | -1.23324800 | -1.40330700 | -1.34304500 | C | -5.02649100 | -1.80374500 | 1.20160700  |
| H  | -0.91073100 | -2.33757000 | -1.81981400 | C | -3.43156300 | -0.09505800 | 1.08640500  |
| H  | -2.21356400 | -1.60715200 | -0.90914800 | C | -4.52866300 | -2.21242100 | 2.44055800  |
| C  | -2.07069600 | 2.04727500  | -2.46303400 | C | -2.90599600 | -0.46095600 | 2.31740900  |
| H  | -2.28318100 | 2.53208600  | -3.42464500 | C | -3.45282800 | -1.53807500 | 3.00466800  |
| H  | -3.01023200 | 2.02620900  | -1.90838500 | C | -5.58428600 | 1.23156100  | -1.07927800 |
| C  | -0.23699400 | -1.00962500 | -0.24961800 | C | -6.07812500 | 1.95747000  | 0.00329100  |
| H  | -0.57489500 | -0.11524800 | 0.28351900  | C | -5.61108700 | 1.91887900  | -2.29443900 |
| H  | -0.11801500 | -1.80628700 | 0.50002500  | C | -6.54267700 | 3.26822000  | -0.09239200 |
| H  | 0.75534000  | -0.81050500 | -0.67108700 | C | -6.06693600 | 3.22441100  | -2.44236300 |
| C  | -1.02407400 | 2.85293700  | -1.68605900 | C | -6.53433800 | 3.91040100  | -1.32552500 |
| H  | -0.03478200 | 2.81668200  | -2.16364600 | F | -6.97296900 | 5.17778500  | -1.43804800 |
| H  | -1.30709200 | 3.91176600  | -1.59849200 | F | -6.05082600 | 3.83454500  | -3.64440700 |
| H  | -0.92708000 | 2.46441200  | -0.66685600 | F | -5.17117300 | 1.30583900  | -3.42282100 |
| Sn | -1.52395300 | 0.01614300  | -2.95296800 | F | -6.14200000 | 1.39827600  | 1.23795000  |
| Sn | 6.32120600  | 2.71439200  | -1.05789600 | F | -6.99864900 | 3.92111600  | 0.99522800  |
| N  | 2.71106000  | 1.57719000  | 1.16258800  | F | -6.08730700 | -2.50543100 | 0.74372700  |
| C  | 3.30933000  | 2.58974800  | 2.09875900  | F | -5.07691100 | -3.25212400 | 3.09574500  |
| H  | 3.54715500  | 3.47212800  | 1.50146000  | F | -2.94514500 | -1.91592500 | 4.19362300  |
| H  | 4.23995300  | 2.16455800  | 2.48010900  | F | -1.85790100 | 0.21493900  | 2.85652100  |
| C  | 2.41644500  | 0.29452200  | 1.90127600  | F | -2.83886000 | 0.97378200  | 0.48296000  |
| H  | 3.37314700  | -0.07953700 | 2.27463100  | F | -7.95970900 | -0.20277300 | -1.50975000 |
| H  | 2.02457900  | -0.41099600 | 1.16856800  | F | -9.34564300 | -2.01491300 | -2.90841100 |
| C  | 1.44815700  | 2.12500900  | 0.54394800  | F | -8.10359000 | -4.22222400 | -3.94981300 |
| H  | 1.09605800  | 1.37921000  | -0.16656500 | F | -5.41248400 | -4.57328500 | -3.55298000 |
| H  | 1.72853900  | 3.02508600  | -0.00486600 | F | -4.00112800 | -2.76983500 | -2.15549100 |
| N  | 1.05337700  | 2.06017800  | 2.99802800  | H | -3.93631800 | -0.21445900 | -1.67222700 |
| C  | 1.39770600  | 0.63492700  | 3.02902000  |   |             |             |             |
| H  | 0.48245000  | 0.05479700  | 2.90473700  |   |             |             |             |

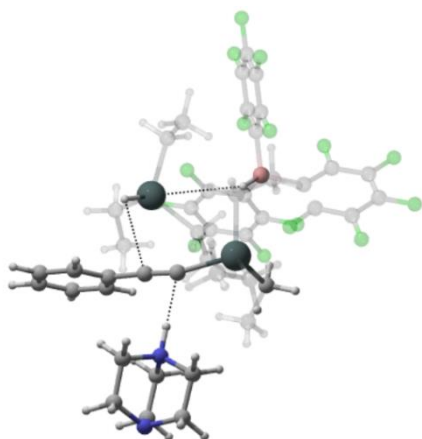

17'

|   |             |            |             |    |             |             |             |
|---|-------------|------------|-------------|----|-------------|-------------|-------------|
| C | 0.52183400  | 4.07533900 | -1.83940700 | H  | -3.09624100 | 2.81962500  | 3.47118600  |
| C | 1.40935800  | 3.34959000 | -2.27960700 | H  | -1.94994200 | 1.53968300  | 3.07914400  |
| C | -0.45193800 | 4.92416600 | -1.23504300 | H  | -1.66985600 | 3.17314100  | 2.48460400  |
| C | -0.69545200 | 4.81812000 | 0.14939600  | C  | -3.17825900 | -0.39692300 | -1.15248000 |
| C | -1.19152700 | 5.84581600 | -2.00000800 | H  | -4.25706000 | -0.19359800 | -1.11884400 |
| C | -1.66086800 | 5.62064800 | 0.75226700  | H  | -3.00116300 | -1.25624300 | -0.50111900 |
| H | -0.15011200 | 4.07909100 | 0.72864100  | C  | -0.06268200 | 0.95202400  | 0.03791500  |
| C | -2.15225900 | 6.64859000 | -1.38711100 | H  | 0.15292800  | -0.00960200 | -0.43785900 |
| H | -1.02428100 | 5.90268900 | -3.07153800 | H  | 0.46431400  | 1.72139100  | -0.53347700 |
| C | -2.38801400 | 6.53893200 | -0.01249700 | C  | -2.73785100 | -0.71088400 | -2.58937000 |
| H | -1.86214400 | 5.51357600 | 1.81369700  | H  | -1.67705600 | -0.98006500 | -2.63141200 |
| H | -2.73012600 | 7.34831800 | -1.98404400 | H  | -3.29420200 | -1.56158600 | -3.00456500 |
| H | -3.14782300 | 7.15544000 | 0.45890800  | H  | -2.89451100 | 0.14398400  | -3.26041200 |
| C | 3.46207500  | 0.94246500 | -1.01782400 | C  | 0.45713000  | 0.92616200  | 1.48088900  |
| H | 4.39544500  | 0.43935500 | -1.29899300 | H  | 0.33858300  | 1.89724100  | 1.97764200  |
| H | 2.82874100  | 0.17858600 | -0.56298700 | H  | -0.06520600 | 0.18094700  | 2.08571300  |
| C | 3.74255900  | 2.06010800 | -0.00590600 | H  | 1.52264400  | 0.66393900  | 1.51311400  |
| H | 2.82018100  | 2.58075400 | 0.27727300  | C  | 1.02987700  | 0.23475600  | -3.61818100 |
| H | 4.18745600  | 1.66023700 | 0.91389000  | H  | 0.06909300  | 0.52535600  | -3.18036000 |
| H | 4.44771300  | 2.80326100 | -0.40583900 | H  | 0.94938300  | 0.40901400  | -4.69823600 |
| C | 3.34574100  | 3.35754900 | -5.24297900 | C  | 1.33935900  | -1.24066400 | -3.31592500 |
| H | 4.10615500  | 3.73668100 | -5.93905300 | H  | 0.55585100  | -1.89185700 | -3.71979200 |
| H | 2.54196100  | 2.92096800 | -5.84777000 | H  | 2.29211800  | -1.55882300 | -3.75807100 |
| H | 2.90834800  | 4.22026300 | -4.72177700 | H  | 1.38981000  | -1.43398500 | -2.24047900 |
| C | 3.92835900  | 2.33320900 | -4.25712500 | Sn | 2.49148100  | 1.58681600  | -2.82338400 |
| H | 4.33981500  | 1.47610300 | -4.80467900 | Sn | -2.17741300 | 1.30315700  | -0.29521100 |
| H | 4.77339300  | 2.76467200 | -3.70252400 | N  | 4.50339600  | 7.71435900  | -0.90641700 |
| H | 2.50777800  | 4.88313800 | -1.77354600 | C  | 3.40434100  | 8.14040700  | -1.78031800 |
| C | -3.25633800 | 2.09505800 | 1.41238000  | H  | 3.83093900  | 8.61087300  | -2.67045900 |
| H | -3.78571600 | 2.98976700 | 1.05871600  | H  | 2.81408300  | 8.89564200  | -1.25444000 |
| H | -4.02509600 | 1.35366100 | 1.65933500  | C  | 3.95814100  | 7.11091500  | 0.31604100  |
| C | -2.44915800 | 2.42472300 | 2.67614800  | H  | 3.36129100  | 7.86345700  | 0.83826700  |
|   |             |            |             | H  | 4.79065300  | 6.83457700  | 0.96859700  |
|   |             |            |             | C  | 5.34226700  | 6.73727000  | -1.60917800 |
|   |             |            |             | H  | 6.16752700  | 6.45099400  | -0.95170100 |
|   |             |            |             | H  | 5.77132400  | 7.21754400  | -2.49278300 |
|   |             |            |             | N  | 3.10650300  | 5.70746600  | -1.52200500 |
|   |             |            |             | C  | 3.09111600  | 5.86342400  | -0.02420500 |
|   |             |            |             | H  | 3.48018800  | 4.93461600  | 0.39576900  |
|   |             |            |             | H  | 2.04458000  | 5.96543400  | 0.27037000  |
|   |             |            |             | C  | 2.51121100  | 6.92692500  | -2.17359700 |
|   |             |            |             | H  | 1.48341800  | 7.00739900  | -1.81507200 |
|   |             |            |             | H  | 2.48837300  | 6.73296100  | -3.24844800 |
|   |             |            |             | C  | 4.50825300  | 5.48632600  | -2.01634400 |



|   |             |             |             |
|---|-------------|-------------|-------------|
| H | 4.44623800  | 5.33686900  | -3.09633600 |
| H | 4.86656700  | 4.56232900  | -1.55993000 |
| H | -2.23702900 | 2.53041000  | -1.53510900 |
| B | -0.64100900 | -2.79264700 | 1.23281200  |
| C | 0.75379100  | -3.62610800 | 1.06824900  |
| C | 1.91127100  | -3.05397500 | 0.55186800  |
| C | 0.86560900  | -4.98575600 | 1.36386100  |
| C | 3.09463600  | -3.75305400 | 0.32910000  |
| C | 2.02365300  | -5.73073500 | 1.16144500  |
| C | 3.15243300  | -5.10715400 | 0.63537600  |
| C | -0.99252000 | -2.33984300 | 2.76331500  |
| C | -0.24293700 | -2.60522900 | 3.90993800  |
| C | -2.10362500 | -1.52438300 | 2.99380300  |
| C | -0.56429900 | -2.11742400 | 5.17809700  |
| C | -2.47448800 | -1.02476300 | 4.23568200  |
| C | -1.69038500 | -1.32188300 | 5.34639300  |
| C | -1.83044000 | -3.62427300 | 0.47709400  |
| C | -2.93002800 | -4.25077200 | 1.06173400  |
| C | -1.78218800 | -3.72721000 | -0.91474700 |
| C | -3.92658500 | -4.89911300 | 0.33288200  |
| C | -2.74646600 | -4.36705900 | -1.68536000 |
| C | -3.83748200 | -4.95542700 | -1.05357200 |
| F | -4.78922500 | -5.57640800 | -1.77513700 |
| F | -2.64304200 | -4.41696600 | -3.03039300 |
| F | -0.74287100 | -3.17412400 | -1.59412500 |
| F | -3.08299500 | -4.26170000 | 2.40733200  |
| F | -4.97239300 | -5.47750000 | 0.95525900  |
| F | 0.87648500  | -3.36763600 | 3.85278100  |
| F | 0.20986200  | -2.40710800 | 6.24275200  |
| F | -2.01676300 | -0.84181500 | 6.56102400  |
| F | -3.57311100 | -0.25429200 | 4.37715700  |
| F | -2.90204900 | -1.17261000 | 1.95040800  |
| F | -0.18965100 | -5.64240400 | 1.89759900  |
| F | 2.07218100  | -7.04111800 | 1.46909900  |
| F | 4.28444300  | -5.80559500 | 0.42773800  |
| F | 4.18094600  | -3.13106100 | -0.18450500 |
| F | 1.94352300  | -1.73001100 | 0.23093400  |
| H | -0.52628000 | -1.76363300 | 0.61207900  |

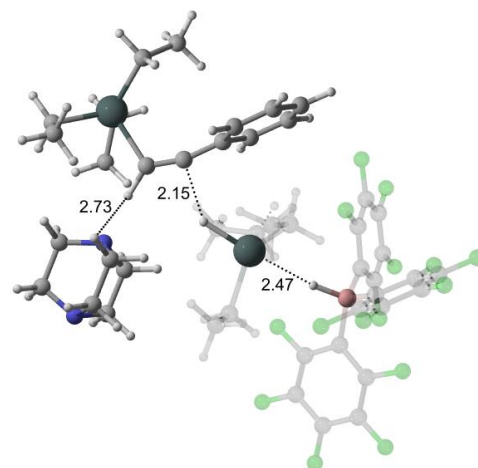

**TS15**

|   |            |             |             |
|---|------------|-------------|-------------|
| C | 3.20198500 | -1.89001800 | 3.72164800  |
| C | 3.90866700 | -0.85936600 | 3.88216300  |
| C | 2.65707500 | -3.10576700 | 3.25578900  |
| C | 3.08337100 | -4.33461000 | 3.80588700  |
| C | 1.68741500 | -3.09118600 | 2.22784400  |
| C | 2.54283300 | -5.52371200 | 3.33144400  |
| H | 3.81577900 | -4.33407000 | 4.60637300  |
| C | 1.14025600 | -4.28476600 | 1.77434600  |
| H | 1.36856600 | -2.14125900 | 1.81523700  |
| C | 1.56741400 | -5.49883600 | 2.32624300  |
| H | 2.86012600 | -6.47006400 | 3.75819200  |
| H | 0.36696400 | -4.27211900 | 1.01334400  |
| H | 1.12656500 | -6.42904400 | 1.98029900  |
| C | 4.68886900 | 0.79634100  | 1.04835800  |
| H | 4.00203600 | 0.23871500  | 0.40046000  |
| H | 5.48698900 | 1.18033300  | 0.40030500  |
| C | 3.95380300 | 1.95169400  | 1.74651700  |
| H | 4.62550100 | 2.52863100  | 2.39447300  |
| H | 3.52793500 | 2.64977700  | 1.01533200  |
| H | 3.12845600 | 1.58507100  | 2.36699700  |
| C | 5.15092100 | -2.92780400 | 0.41025100  |
| H | 5.43287600 | -3.91733200 | 0.02941100  |
| H | 4.08815100 | -2.97244600 | 0.67099400  |
| H | 5.25918000 | -2.21656300 | -0.41710000 |
| C | 6.01807400 | -2.53462600 | 1.61744000  |
| H | 5.90476200 | -3.26696100 | 2.42620800  |
| H | 7.08124000 | -2.53793700 | 1.34561000  |
| H | 3.80856000 | -0.00155800 | 4.63018800  |
| H | 1.69003700 | -1.53147300 | 5.20064500  |
| C | 7.08652100 | 0.22749600  | 3.70345500  |
| H | 6.79689400 | 1.25839300  | 3.93975900  |

|    |             |             |            |   |             |             |             |
|----|-------------|-------------|------------|---|-------------|-------------|-------------|
| H  | 8.01473300  | 0.28980000  | 3.12133400 | H | 4.09658300  | 4.23645400  | 6.78746200  |
| C  | 7.31002000  | -0.58255900 | 4.98984500 | C | 1.91541700  | 2.75895300  | 6.85012500  |
| H  | 8.07703900  | -0.12009100 | 5.62395400 | H | 1.76268200  | 3.78522200  | 6.49982400  |
| H  | 6.39215100  | -0.65756600 | 5.58480300 | H | 1.00665600  | 2.44996000  | 7.37639600  |
| H  | 7.64129300  | -1.60525300 | 4.77274600 | B | -3.68649400 | -2.56955300 | 5.19769700  |
| C  | -0.71395700 | -0.95254200 | 3.42535100 | C | -3.96644900 | -2.60918500 | 3.59000200  |
| H  | -0.66228500 | -1.73861900 | 2.66659200 | C | -3.06777900 | -3.26824000 | 2.74998900  |
| H  | -1.77078300 | -0.70162100 | 3.53084700 | C | -5.01439200 | -1.97895800 | 2.91838700  |
| C  | 0.08059500  | 0.28394900  | 2.98627300 | C | -3.15718700 | -3.28758600 | 1.36506400  |
| H  | -0.24403100 | 0.63984300  | 1.99851500 | C | -5.15215900 | -1.97454200 | 1.52900500  |
| H  | -0.06066100 | 1.11617300  | 3.68605800 | C | -4.21187000 | -2.62871100 | 0.74166300  |
| H  | 1.15958500  | 0.08980900  | 2.93024700 | C | -3.76356100 | -4.02663200 | 5.92244500  |
| C  | -0.02820600 | -3.93870000 | 5.55497500 | C | -4.37988500 | -5.16951900 | 5.41463600  |
| H  | 0.28602900  | -4.35491900 | 4.59380500 | C | -3.13918100 | -4.20969300 | 7.15704500  |
| H  | -1.04468500 | -4.29805600 | 5.72144200 | C | -4.36392600 | -6.40547200 | 6.05946000  |
| C  | -0.61528900 | -0.62607400 | 7.04582200 | C | -3.09668700 | -5.41953300 | 7.84079600  |
| H  | -0.37723400 | 0.42261300  | 6.82517000 | C | -3.71308600 | -6.53466700 | 7.28176100  |
| H  | -1.70220200 | -0.67867300 | 7.14529800 | C | -4.53843200 | -1.43153400 | 5.99458400  |
| C  | 0.90652900  | -4.40234500 | 6.67884000 | C | -5.65671200 | -1.68380700 | 6.79039400  |
| H  | 0.53356700  | -4.09934900 | 7.66321400 | C | -4.16488200 | -0.08892500 | 5.94002700  |
| H  | 1.00067100  | -5.49724000 | 6.69285100 | C | -6.34030600 | -0.69715300 | 7.49860800  |
| H  | 1.91780400  | -3.98804700 | 6.57015900 | C | -4.81249400 | 0.93213900  | 6.62728500  |
| C  | 0.05279200  | -1.07649200 | 8.35222700 | C | -5.91211300 | 0.62393300  | 7.42132600  |
| H  | 1.14665400  | -1.11760400 | 8.27246200 | F | -6.55409000 | 1.59053300  | 8.10008500  |
| H  | -0.19046800 | -0.39666200 | 9.18048400 | F | -4.38782500 | 2.20870100  | 6.53408100  |
| H  | -0.28928000 | -2.07438200 | 8.64388900 | F | -3.11555000 | 0.29279900  | 5.16169500  |
| Sn | -0.08748700 | -1.80107900 | 5.31375500 | F | -6.15605900 | -2.93815000 | 6.89439800  |
| Sn | 5.55846800  | -0.59977600 | 2.43385500 | F | -7.41028700 | -1.00593000 | 8.25429100  |
| N  | 3.56589500  | 1.18803700  | 5.86533300 | F | -5.05466800 | -5.12509200 | 4.24093300  |
| C  | 4.58124700  | 2.25719900  | 5.93180300 | F | -4.97061400 | -7.47632000 | 5.51326200  |
| H  | 4.57229300  | 2.79120700  | 4.97489600 | F | -3.68089500 | -7.72006600 | 7.91595300  |
| H  | 5.56348800  | 1.78609300  | 6.04726400 | F | -2.45662400 | -5.52720100 | 9.02245500  |
| C  | 3.57126200  | 0.42821300  | 7.13581800 | F | -2.51298800 | -3.16140000 | 7.75546400  |
| H  | 4.56291800  | -0.02410000 | 7.25154500 | F | -5.98285100 | -1.32705300 | 3.60213900  |
| H  | 2.84390700  | -0.38129200 | 7.03814800 | F | -6.18352700 | -1.34023300 | 0.94189600  |
| C  | 2.23027700  | 1.79354900  | 5.66417400 | F | -4.31833400 | -2.62793100 | -0.59899900 |
| H  | 1.50788400  | 0.97911000  | 5.59778100 | F | -2.22425500 | -3.92474000 | 0.61781900  |
| H  | 2.23665700  | 2.31323400  | 4.70031500 | F | -2.01447400 | -3.94169000 | 3.28587100  |
| N  | 3.02906400  | 2.76045100  | 7.81153800 | H | -2.51599700 | -2.23288700 | 5.30068000  |
| C  | 3.22951200  | 1.39297600  | 8.31539600 |   |             |             |             |
| H  | 2.31390600  | 1.07844300  | 8.82561100 |   |             |             |             |
| H  | 4.03423400  | 1.41492000  | 9.05822300 |   |             |             |             |
| C  | 4.25063600  | 3.20781400  | 7.13062000 |   |             |             |             |
| H  | 5.06681300  | 3.21913400  | 7.86110400 |   |             |             |             |

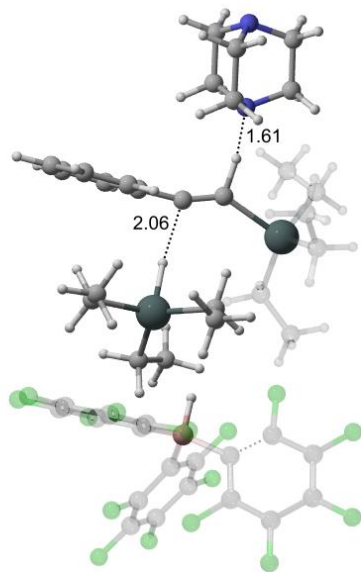

**TS15'**

|   |             |             |             |    |             |             |             |
|---|-------------|-------------|-------------|----|-------------|-------------|-------------|
| C | 2.76593700  | 1.85070600  | 1.62233700  | C  | 0.11919500  | -0.15877900 | 4.37500000  |
| C | 3.83552300  | 1.57425500  | 1.01380300  | H  | -0.19711000 | 0.83497800  | 4.03297800  |
| C | 1.83098400  | 2.56178400  | 2.42390800  | H  | -0.79937900 | -0.74215600 | 4.50721400  |
| C | 2.10964000  | 2.74339200  | 3.79399200  | C  | 0.86598600  | -0.04913200 | 5.71163600  |
| C | 0.65293300  | 3.10333200  | 1.86964200  | H  | 0.22622700  | 0.39280700  | 6.48735500  |
| C | 1.23007200  | 3.47016500  | 4.59164900  | H  | 1.19084000  | -1.02690800 | 6.07671300  |
| H | 3.00490700  | 2.29857300  | 4.21640700  | H  | 1.76086700  | 0.57805400  | 5.62869000  |
| C | -0.22027700 | 3.82449700  | 2.67567600  | C  | -0.21880900 | -2.33766600 | 1.65722100  |
| H | 0.43234800  | 2.93194700  | 0.82097700  | H  | -1.18201200 | -1.82866000 | 1.79901400  |
| C | 0.06671600  | 4.00991800  | 4.03527200  | H  | -0.28730500 | -3.27798700 | 2.20516600  |
| H | 1.44011000  | 3.59729400  | 5.64910900  | C  | 3.24781400  | -1.54215600 | 3.11802700  |
| H | -1.13151300 | 4.23570700  | 2.25203700  | H  | 3.50895200  | -2.38454200 | 2.47507900  |
| H | -0.62555700 | 4.56380100  | 4.66249700  | H  | 3.77973600  | -0.66135200 | 2.74046800  |
| C | 6.30982000  | -0.77524000 | 1.50159900  | C  | 0.03305700  | -2.59570500 | 0.16908300  |
| H | 7.19752600  | -1.08235100 | 0.93405000  | H  | 0.93983100  | -3.18608600 | 0.01157900  |
| H | 5.92642000  | -1.67162700 | 1.99832400  | H  | -0.79761200 | -3.16524300 | -0.26863400 |
| C | 6.68515600  | 0.29195100  | 2.53910900  | H  | 0.12864700  | -1.66420700 | -0.40317100 |
| H | 5.81404000  | 0.60614800  | 3.12582600  | C  | 3.70218300  | -1.82812100 | 4.55302100  |
| H | 7.43493800  | -0.08787600 | 3.24404200  | H  | 3.55093200  | -0.96483100 | 5.20966700  |
| H | 7.10717800  | 1.18773300  | 2.06528600  | H  | 3.16695300  | -2.67513200 | 4.98419300  |
| C | 4.81330900  | 1.76799000  | -2.39651000 | H  | 4.77116000  | -2.07861500 | 4.57403300  |
| H | 5.31809000  | 2.25532700  | -3.24107600 | C  | 3.40486000  | -1.59655600 | -0.54644700 |
| H | 3.96306900  | 1.20955300  | -2.80654100 | H  | 2.52058300  | -1.48172400 | 0.08248900  |
| H | 4.39771100  | 2.55858400  | -1.75929700 | H  | 3.08887600  | -1.34380400 | -1.56601900 |
| C | 5.76731600  | 0.85156000  | -1.61520100 | C  | 3.93898700  | -3.03711000 | -0.47884500 |
| H | 6.16446800  | 0.06984200  | -2.27577400 | H  | 3.17066000  | -3.74889400 | -0.80259700 |
| H | 6.63739400  | 1.41270300  | -1.25295700 | H  | 4.81289100  | -3.18186600 | -1.12641200 |
| H | 4.56457900  | 2.51891200  | 0.95013700  | H  | 4.22577800  | -3.32425500 | 0.53763000  |
|   |             |             |             | Sn | 4.84186700  | -0.13493800 | 0.06293200  |
|   |             |             |             | Sn | 1.17288600  | -1.09006700 | 2.73116500  |
|   |             |             |             | N  | 6.42993100  | 6.20452700  | 1.34557600  |
|   |             |             |             | C  | 5.11520900  | 6.33366100  | 0.70210000  |
|   |             |             |             | H  | 5.24935700  | 6.84711800  | -0.25543700 |
|   |             |             |             | H  | 4.48393500  | 6.96708200  | 1.33357900  |
|   |             |             |             | C  | 6.26473900  | 5.54899200  | 2.65026500  |
|   |             |             |             | H  | 5.63553500  | 6.18702200  | 3.27921800  |
|   |             |             |             | H  | 7.24772800  | 5.47836500  | 3.12682600  |
|   |             |             |             | C  | 7.30347800  | 5.37979500  | 0.49965200  |
|   |             |             |             | H  | 8.28470700  | 5.31313200  | 0.98039900  |
|   |             |             |             | H  | 7.43693700  | 5.89126900  | -0.45905800 |
|   |             |             |             | N  | 5.39451600  | 3.89252000  | 1.02411600  |
|   |             |             |             | C  | 5.62613600  | 4.13474900  | 2.46696700  |
|   |             |             |             | H  | 6.27319100  | 3.33636200  | 2.84174300  |
|   |             |             |             | H  | 4.66082500  | 4.05119000  | 2.97532700  |

|   |             |             |             |
|---|-------------|-------------|-------------|
| C | 4.47198200  | 4.92366300  | 0.49758000  |
| H | 3.52022300  | 4.82235900  | 1.02927900  |
| H | 4.29147700  | 4.70276400  | -0.55932500 |
| C | 6.67900400  | 3.95970700  | 0.29570300  |
| H | 6.47903500  | 3.74847700  | -0.75860300 |
| H | 7.32768000  | 3.16728400  | 0.68231700  |
| H | 1.48856900  | 0.23285700  | 1.55796300  |
| B | 1.44263600  | -4.79119000 | 4.17835600  |
| C | 2.73285700  | -5.77539100 | 4.38706800  |
| C | 3.96711000  | -5.58831700 | 3.77011500  |
| C | 2.64071200  | -6.94335400 | 5.14770700  |
| C | 5.04014300  | -6.46882000 | 3.90109100  |
| C | 3.68058200  | -7.85190300 | 5.31078200  |
| C | 4.89794700  | -7.61116500 | 4.67857200  |
| C | 0.83616200  | -4.14420300 | 5.55753200  |
| C | 1.52033000  | -4.06434900 | 6.77378500  |
| C | -0.40471500 | -3.50065600 | 5.57500700  |
| C | 1.01557500  | -3.44206400 | 7.91589600  |
| C | -0.95411700 | -2.87225100 | 6.68649000  |
| C | -0.23665400 | -2.84219300 | 7.87662900  |
| C | 0.37343900  | -5.63956200 | 3.27271300  |
| C | -0.77660600 | -6.29215300 | 3.71855300  |
| C | 0.62196300  | -5.78028200 | 1.90505200  |
| C | -1.63539900 | -7.00062600 | 2.87878500  |
| C | -0.20454300 | -6.47446100 | 1.02790500  |
| C | -1.35060500 | -7.09042200 | 1.52044200  |
| F | -2.16800900 | -7.76782800 | 0.69431000  |
| F | 0.08865500  | -6.55382300 | -0.28687100 |
| F | 1.73000800  | -5.21439500 | 1.35753500  |
| F | -1.12721600 | -6.25537000 | 5.02363000  |
| F | -2.73889100 | -7.59853200 | 3.36627200  |
| F | 2.76413700  | -4.58736200 | 6.90733900  |
| F | 1.73894900  | -3.39942900 | 9.05142500  |
| F | -0.73309000 | -2.21697500 | 8.95955600  |
| F | -2.15321900 | -2.25956400 | 6.61185000  |
| F | -1.15560300 | -3.44315500 | 4.44322300  |
| F | 1.48272200  | -7.22643600 | 5.78779000  |
| F | 3.52975400  | -8.95518000 | 6.06760600  |
| F | 5.92076200  | -8.47382400 | 4.81682400  |
| F | 6.21309700  | -6.22338200 | 3.27869300  |
| F | 4.20262900  | -4.50164600 | 2.98732300  |
| H | 1.78731000  | -3.84568800 | 3.50363400  |

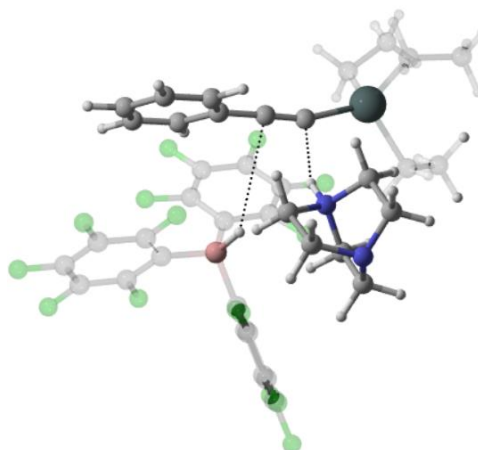

18

|   |             |             |             |
|---|-------------|-------------|-------------|
| C | -3.10671100 | -1.15662100 | 0.33985000  |
| C | -3.63440800 | -1.40210600 | -0.92490200 |
| C | -3.84997200 | -1.69250400 | 1.39324200  |
| C | -4.78391800 | -2.15664400 | -1.15007900 |
| C | -5.00429000 | -2.44895800 | 1.22255300  |
| C | -5.47335700 | -2.68928500 | -0.06724400 |
| C | -0.48865100 | -1.03894000 | 1.23701800  |
| C | -0.39491700 | -2.38428100 | 1.59425900  |
| C | 0.70825000  | -0.33811900 | 1.38536400  |
| C | 0.77472900  | -2.98587300 | 2.06387900  |
| C | 1.89254400  | -0.88255900 | 1.85879400  |
| C | 1.93309100  | -2.23045400 | 2.19805500  |
| C | -2.22012100 | 1.07067700  | 1.45104500  |
| C | -1.94842800 | 1.32047600  | 2.79794200  |
| C | -2.95770300 | 2.07605500  | 0.82396900  |
| C | -2.35253900 | 2.47641200  | 3.46616300  |
| C | -3.37775300 | 3.24914300  | 1.44204900  |
| C | -3.06983900 | 3.45376000  | 2.78327900  |
| H | -1.37571400 | 0.13570200  | -0.48032000 |
| C | 4.74404400  | 0.61888500  | -3.47990300 |
| H | 5.06438200  | -0.32327000 | -3.94173700 |
| H | 3.94880600  | 1.01721100  | -4.12401700 |
| C | 5.91799800  | 1.60920000  | -3.40400400 |
| H | 6.74479400  | 1.21122200  | -2.80355700 |
| H | 6.32114000  | 1.83722600  | -4.39945600 |
| H | 5.61723300  | 2.56125100  | -2.94871700 |
| C | 4.95830800  | -1.37233500 | -0.52687400 |
| H | 4.64513800  | -1.37721800 | 0.52157200  |
| H | 4.63547500  | -2.32851600 | -0.95605500 |
| C | 6.48427100  | -1.21892500 | -0.63590600 |
| H | 6.83310900  | -0.28353300 | -0.18191300 |
| H | 7.00079600  | -2.04001300 | -0.12253700 |



|   |             |             |             |   |             |             |             |
|---|-------------|-------------|-------------|---|-------------|-------------|-------------|
| H | 1.53044200  | 1.70882100  | -4.54755000 | F | -5.07196500 | 3.77756700  | 0.50685500  |
| C | 1.14782300  | -2.69369100 | -3.89568300 | F | -4.05713200 | 5.09090700  | -1.67108900 |
| H | 1.02293000  | -2.80890500 | -4.98023800 | F | -1.62490700 | 4.34912500  | -2.69182700 |
| H | 2.20193300  | -2.92684100 | -3.69188700 | F | -0.22816300 | 2.36235700  | -1.57373700 |
| C | -1.28592400 | -0.21382100 | -3.13738300 | F | -2.16718100 | -0.84911000 | 3.15825500  |
| H | -1.82931900 | -1.16340500 | -3.21031300 | F | -1.67759900 | -0.30716700 | 5.72898100  |
| H | -1.41707000 | 0.14359000  | -2.11681400 | F | -0.16431200 | 1.86432000  | 6.43732700  |
| C | 3.26935300  | 0.45858600  | -4.94206100 | F | 0.85332000  | 3.49743100  | 4.48623100  |
| H | 3.51303300  | -0.56163800 | -5.26657700 | F | 0.37627700  | 2.97275800  | 1.89368900  |
| H | 3.72930700  | 1.14721800  | -5.66315500 | H | 0.06917400  | 0.82259600  | 0.33595800  |
| H | 3.75825500  | 0.62293000  | -3.97383600 | N | 3.27463500  | -2.44138900 | 0.37094300  |
| C | 0.21798000  | -3.66756700 | -3.15472900 | C | 3.13573000  | -2.86011300 | 1.81220800  |
| H | 0.44444600  | -4.71604200 | -3.39092700 | H | 2.10706500  | -3.18999400 | 1.94805200  |
| H | 0.28592200  | -3.55373200 | -2.06701900 | H | 3.30078500  | -1.96708100 | 2.41807700  |
| H | -0.83183500 | -3.49716100 | -3.41864800 | C | 4.69034000  | -2.00066300 | 0.09812100  |
| C | -1.84659400 | 0.81134700  | -4.13454900 | H | 4.91137600  | -1.19826100 | 0.80286100  |
| H | -1.33325200 | 1.77529100  | -4.05346100 | H | 4.70203300  | -1.58432500 | -0.91051700 |
| H | -1.75299500 | 0.47236500  | -5.17405800 | C | 2.90512900  | -3.57932300 | -0.54400400 |
| H | -2.91193700 | 0.99142500  | -3.94330800 | H | 3.04979400  | -3.21693700 | -1.56307500 |
| B | -1.04655400 | 0.75669500  | 0.78088700  | H | 1.84762200  | -3.78477500 | -0.38991600 |
| C | -0.90078100 | 1.02613800  | 2.38776500  | N | 4.83569900  | -4.38196200 | 0.80587600  |
| C | -0.15527700 | 2.13109000  | 2.81122900  | C | 5.60136200  | -3.24734700 | 0.27610100  |
| C | -1.40470800 | 0.24085200  | 3.42401800  | H | 6.04163300  | -3.54686400 | -0.67937200 |
| C | 0.10291600  | 2.43016400  | 4.14547200  | H | 6.42100000  | -3.02282300 | 0.96435300  |
| C | -1.17319600 | 0.49956400  | 4.77500100  | C | 4.18080300  | -3.98582100 | 2.05997200  |
| C | -0.40825000 | 1.60150400  | 5.14048500  | H | 4.95335400  | -3.65230600 | 2.75861100  |
| C | -1.90525800 | 1.95025400  | 0.08355500  | H | 3.69455200  | -4.86332300 | 2.49454100  |
| C | -3.14352300 | 2.37620400  | 0.56494600  | C | 3.81783700  | -4.78189400 | -0.17421400 |
| C | -1.43072600 | 2.66341900  | -1.01609300 | H | 3.22556900  | -5.59418600 | 0.25578200  |
| C | -3.87689400 | 3.41633400  | 0.00347600  | H | 4.31959600  | -5.16979200 | -1.06513500 |
| C | -2.13070300 | 3.70670000  | -1.61862100 | H | 2.64297800  | -1.65163900 | 0.15445600  |
| C | -3.36538700 | 4.08669000  | -1.10515700 |   |             |             |             |
| C | -1.55243300 | -0.76093100 | 0.42150100  |   |             |             |             |
| C | -2.74055700 | -1.14408400 | -0.20491400 |   |             |             |             |
| C | -0.70233400 | -1.83022400 | 0.69405700  |   |             |             |             |
| C | -3.05697600 | -2.46297300 | -0.53749900 |   |             |             |             |
| C | -0.97648400 | -3.15811100 | 0.40305500  |   |             |             |             |
| C | -2.16858200 | -3.48651000 | -0.23061800 |   |             |             |             |
| F | -2.44292100 | -4.76262100 | -0.55101000 |   |             |             |             |
| F | -0.08394100 | -4.13733800 | 0.71622300  |   |             |             |             |
| F | 0.49898900  | -1.60340600 | 1.31487300  |   |             |             |             |
| F | -3.66640400 | -0.22663700 | -0.55535400 |   |             |             |             |
| F | -4.20813300 | -2.75422000 | -1.16802800 |   |             |             |             |
| F | -3.69633000 | 1.74718400  | 1.62849200  |   |             |             |             |

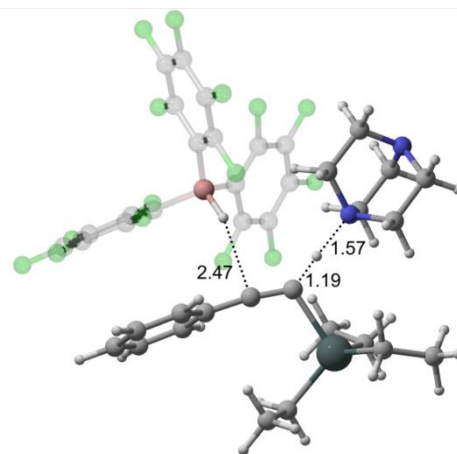

**TS16**

|    |             |             |             |   |             |             |             |
|----|-------------|-------------|-------------|---|-------------|-------------|-------------|
| C  | 3.29819900  | -1.18863200 | 3.01379000  | C | -2.14919000 | 3.10346800  | 1.44176700  |
| C  | 2.58085400  | -1.40332500 | 1.84387200  | C | -0.53334500 | 3.28586800  | -0.25143900 |
| C  | 2.76230800  | -0.53523100 | 0.74198700  | C | -2.53222800 | 4.42810300  | 1.26433700  |
| C  | 3.65851900  | 0.55340800  | 0.84113100  | C | -0.88273100 | 4.61752900  | -0.47058900 |
| C  | 4.36322600  | 0.75980500  | 2.01953800  | C | -1.89273600 | 5.19348700  | 0.29144900  |
| C  | 4.18569800  | -0.10982600 | 3.10240800  | C | -1.84344100 | -0.19883800 | 0.68748700  |
| H  | 3.15375000  | -1.84694300 | 3.86475600  | C | -3.10709500 | 0.01037100  | 0.12874300  |
| H  | 1.87640600  | -2.22141100 | 1.76481900  | C | -1.54964100 | -1.54920600 | 0.90041100  |
| H  | 3.76366000  | 1.23186800  | 0.00124700  | C | -4.01461700 | -1.01183500 | -0.15602400 |
| H  | 5.03106300  | 1.61024400  | 2.10931400  | C | -2.41863700 | -2.60265200 | 0.64454800  |
| H  | 4.72616100  | 0.06832600  | 4.02739200  | C | -3.67395100 | -2.33212200 | 0.10761300  |
| C  | 2.09345400  | -0.78241300 | -0.46957000 | F | -4.52558500 | -3.33130400 | -0.17803300 |
| C  | 1.63794900  | -1.10788800 | -1.58702600 | F | -2.05537200 | -3.87690300 | 0.89038500  |
| Sn | 2.76743100  | -2.75815800 | -2.53324500 | F | -0.33530300 | -1.89863700 | 1.39736100  |
| C  | 1.24251200  | -4.27170900 | -2.63724400 | F | -3.52637300 | 1.25263600  | -0.21539300 |
| H  | 0.55349200  | -4.00469600 | -3.44793500 | F | -5.20710700 | -0.73165800 | -0.71567300 |
| H  | 1.71901400  | -5.21395900 | -2.93667200 | F | -2.80354900 | 2.39927900  | 2.39541200  |
| C  | 3.38405500  | -1.97343300 | -4.44515400 | F | -3.50926600 | 4.97737200  | 2.00872900  |
| H  | 2.92778100  | -0.98339800 | -4.55732100 | F | -2.24448200 | 6.47575700  | 0.09583100  |
| H  | 4.46813200  | -1.81305800 | -4.40909300 | F | -0.24919100 | 5.35240000  | -1.40766600 |
| C  | 4.38726800  | -3.24238100 | -1.20836900 | F | 0.48263800  | 2.80955500  | -1.01939700 |
| H  | 3.97080000  | -3.34126600 | -0.19875100 | F | -1.68765600 | -0.56004400 | 3.52819000  |
| H  | 4.75978800  | -4.23661400 | -1.48688200 | F | -0.46020100 | -0.51524400 | 5.89451400  |
| C  | 0.48792000  | -4.43971900 | -1.30911100 | F | 1.77216900  | 1.02527400  | 6.28670800  |
| H  | 0.02456900  | -3.50396900 | -0.98245000 | F | 2.74435600  | 2.54087500  | 4.22294300  |
| H  | -0.30875000 | -5.18854000 | -1.39248200 | F | 1.57148900  | 2.46241600  | 1.81301500  |
| H  | 1.15610000  | -4.76487600 | -0.50273800 | N | -0.57424300 | -0.51740100 | -3.13632000 |
| C  | 3.01067500  | -2.88163200 | -5.62787700 | C | -1.60019200 | -1.54481500 | -2.84925000 |
| H  | 3.33206500  | -2.44297600 | -6.58102200 | H | -1.80962800 | -1.51054500 | -1.78093100 |
| H  | 3.48130700  | -3.86932900 | -5.55043300 | H | -1.16845100 | -2.52464200 | -3.07679500 |
| H  | 1.92788800  | -3.04333100 | -5.69283800 | C | -0.22341000 | -0.56780000 | -4.56996200 |
| C  | 5.52996600  | -2.21482500 | -1.21974900 | H | 0.18091000  | -1.56325000 | -4.78630600 |
| H  | 5.97608800  | -2.11280100 | -2.21634100 | H | 0.56811900  | 0.16712800  | -4.75125700 |
| H  | 5.18517700  | -1.22310800 | -0.90770400 | C | -1.10208500 | 0.82908200  | -2.80719400 |
| H  | 6.33221000  | -2.50940200 | -0.53162800 | H | -0.31372500 | 1.55497700  | -3.01946200 |
| H  | 0.68097900  | -0.82052100 | -2.24228900 | H | -1.29394200 | 0.85811900  | -1.73621000 |
| B  | -0.70110200 | 0.93692100  | 0.99991600  | N | -2.66161200 | -0.05490900 | -4.53349700 |
| C  | -0.09431000 | 0.91189300  | 2.52246800  | C | -1.50756300 | -0.26735000 | -5.41438200 |
| C  | 1.02940400  | 1.69922500  | 2.79492800  | H | -1.37080600 | 0.63087100  | -6.02534200 |
| C  | -0.57129400 | 0.20009800  | 3.62362400  | H | -1.73533700 | -1.09943000 | -6.08938900 |
| C  | 1.65619600  | 1.76542400  | 4.03357300  | C | -2.87001800 | -1.25451000 | -3.71082300 |
| C  | 0.03639600  | 0.21671300  | 4.87938300  | H | -3.09660700 | -2.09523300 | -4.37532000 |
| C  | 1.16412400  | 1.00193100  | 5.08656200  | H | -3.74425300 | -1.08782400 | -3.07504800 |
| C  | -1.15509100 | 2.47293600  | 0.69270500  | C | -2.39051500 | 1.08913600  | -3.64671300 |

|   |             |            |             |
|---|-------------|------------|-------------|
| H | -3.25706800 | 1.23293200 | -2.99485900 |
| H | -2.28515800 | 1.98703200 | -4.26436400 |
| H | 0.22691700  | 0.66657900 | 0.26553800  |

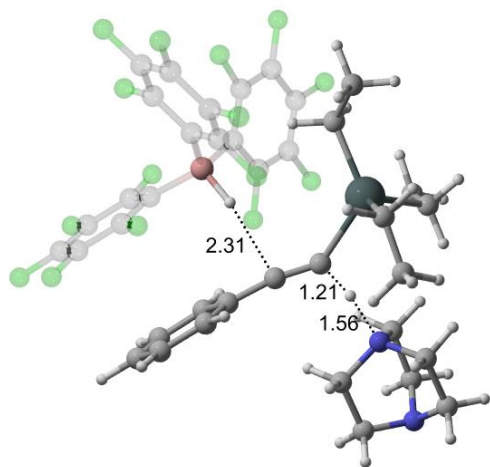

**TS16'**

|    |              |             |             |
|----|--------------|-------------|-------------|
| C  | -8.84970200  | -0.16489600 | -2.15654000 |
| C  | -9.17478000  | -0.75974600 | -3.36938500 |
| C  | -9.78287900  | -2.03578700 | -3.38652000 |
| C  | -10.07063100 | -2.69364700 | -2.16696800 |
| C  | -9.72096100  | -2.09575600 | -0.96290000 |
| C  | -9.11455100  | -0.83412400 | -0.95575000 |
| H  | -8.40769800  | 0.82618600  | -2.14041700 |
| H  | -8.98967800  | -0.24935600 | -4.30884400 |
| H  | -10.56582000 | -3.65549500 | -2.18696700 |
| H  | -9.94401500  | -2.59791500 | -0.02669000 |
| H  | -8.86916900  | -0.35942700 | -0.01028000 |
| C  | -10.03032600 | -2.66891200 | -4.61875900 |
| C  | -10.04501900 | -3.30055200 | -5.70075300 |
| Sn | -11.19444300 | -3.35151600 | -7.57181800 |
| C  | -10.08306500 | -1.92676800 | -8.73749100 |
| H  | -10.44252500 | -1.99301400 | -9.77243300 |
| H  | -10.35987000 | -0.93083100 | -8.37424000 |
| C  | -10.84375200 | -5.39924200 | -8.14730400 |
| H  | -11.16437300 | -5.52307700 | -9.18998500 |
| H  | -9.76477000  | -5.59667000 | -8.13518000 |
| C  | -13.30181700 | -2.98703400 | -7.55793000 |
| H  | -13.80756600 | -3.95457900 | -7.46700200 |
| H  | -13.56482000 | -2.40940800 | -6.67728300 |
| C  | -8.56174700  | -2.12246600 | -8.68398300 |
| H  | -8.26408300  | -3.10703100 | -9.06644000 |
| H  | -8.03823600  | -1.36801800 | -9.28552300 |
| H  | -8.18521500  | -2.03926400 | -7.65699100 |
| C  | -11.59353700 | -6.38958000 | -7.23986100 |

|   |              |             |             |
|---|--------------|-------------|-------------|
| H | -11.38743300 | -7.43270300 | -7.51397600 |
| H | -11.32345100 | -6.26848100 | -6.18435700 |
| H | -12.67850100 | -6.24940200 | -7.30517100 |
| C | -13.74543400 | -2.24956500 | -8.83134600 |
| H | -13.27652400 | -1.26214300 | -8.90806100 |
| H | -13.50349900 | -2.80597800 | -9.74634600 |
| H | -14.83178900 | -2.09591800 | -8.82339300 |
| B | -13.33386000 | -1.73168200 | -4.01108400 |
| C | -13.14591300 | -1.34028600 | -2.43714100 |
| C | -12.43992800 | -0.17726300 | -2.10964300 |
| C | -13.57899900 | -2.07397300 | -1.33154000 |
| C | -12.17820900 | 0.23856900  | -0.81037200 |
| C | -13.32355600 | -1.70706800 | -0.00984400 |
| C | -12.61440600 | -0.54190800 | 0.25502000  |
| C | -13.91164000 | -0.44442000 | -4.83067800 |
| C | -15.06564100 | 0.23914500  | -4.44493000 |
| C | -13.24795500 | 0.11331200  | -5.92039500 |
| C | -15.55347500 | 1.36588100  | -5.09907500 |
| C | -13.69783600 | 1.23291100  | -6.61516300 |
| C | -14.86553300 | 1.86438100  | -6.20317600 |
| C | -14.11818200 | -3.14257800 | -4.30706400 |
| C | -15.36615400 | -3.30083700 | -4.91447100 |
| C | -13.46152800 | -4.35213000 | -4.06532000 |
| C | -15.91022200 | -4.53625300 | -5.26940900 |
| C | -13.95571100 | -5.60601500 | -4.40155100 |
| C | -15.19867000 | -5.70266500 | -5.01802400 |
| F | -15.69721700 | -6.90138400 | -5.36565500 |
| F | -13.24398700 | -6.72304400 | -4.14167900 |
| F | -12.24791700 | -4.35265500 | -3.45079200 |
| F | -16.12213000 | -2.22971800 | -5.24506200 |
| F | -17.10892000 | -4.60748500 | -5.87659100 |
| F | -15.76961100 | -0.19511900 | -3.37568300 |
| F | -16.67889400 | 1.97623700  | -4.68699100 |
| F | -15.32050000 | 2.94627100  | -6.85718800 |
| F | -13.01082900 | 1.71054100  | -7.67389700 |
| F | -12.06827700 | -0.41318900 | -6.36568300 |
| F | -14.29580200 | -3.21169400 | -1.49056200 |
| F | -13.75362900 | -2.47103700 | 1.01231200  |
| F | -12.34219800 | -0.17863000 | 1.52149600  |
| F | -11.47595900 | 1.36432500  | -0.56862800 |
| F | -11.94469700 | 0.61426500  | -3.09477700 |
| H | -12.20837000 | -1.91389600 | -4.42622200 |
| N | -7.88137800  | -5.01164000 | -5.72356200 |
| C | -7.16344600  | -4.44359800 | -4.55914000 |



|   |             |             |             |    |             |             |             |
|---|-------------|-------------|-------------|----|-------------|-------------|-------------|
| H | -7.86614600 | -4.40667700 | -3.72157900 | C  | 1.44243900  | -0.99605700 | -1.55682500 |
| H | -6.88585200 | -3.41372700 | -4.80580000 | Sn | 2.59748400  | -2.63351100 | -2.50764700 |
| C | -6.96881800 | -5.06947400 | -6.88535200 | C  | 1.09022100  | -4.16499000 | -2.61239600 |
| H | -6.64190000 | -4.04909200 | -7.10568200 | H  | 0.39085200  | -3.89656500 | -3.41368300 |
| H | -7.53784100 | -5.43279900 | -7.74625600 | H  | 1.57618000  | -5.09840800 | -2.92393400 |
| C | -8.35637100 | -6.37463100 | -5.39232700 | C  | 3.25773300  | -1.81989800 | -4.38590300 |
| H | -8.88139300 | -6.76671400 | -6.26681800 | H  | 2.37489200  | -1.53000900 | -4.96665200 |
| H | -9.08226600 | -6.28850100 | -4.57763500 | H  | 3.80843100  | -0.89629000 | -4.17119800 |
| N | -5.88064700 | -6.49014900 | -5.15156900 | C  | 4.24363100  | -3.10282500 | -1.21062800 |
| C | -5.76922900 | -6.01128000 | -6.53608200 | H  | 3.85818400  | -3.18506000 | -0.18760300 |
| H | -5.74830600 | -6.88246700 | -7.19875700 | H  | 4.60824900  | -4.10138000 | -1.48363000 |
| H | -4.81430400 | -5.48703700 | -6.64539500 | C  | 0.35013000  | -4.35453100 | -1.27868200 |
| C | -5.91980800 | -5.33480400 | -4.24484300 | H  | -0.12697300 | -3.42937800 | -0.94172100 |
| H | -4.98990200 | -4.77016000 | -4.36755800 | H  | -0.43418200 | -5.11639300 | -1.36175400 |
| H | -5.95154700 | -5.70350300 | -3.21469400 | H  | 1.03073300  | -4.67450900 | -0.48057600 |
| C | -7.12628300 | -7.25715500 | -5.00434400 | C  | 4.13479000  | -2.80355900 | -5.17902100 |
| H | -7.19717500 | -7.59909800 | -3.96690700 | H  | 4.47234500  | -2.36008600 | -6.12432200 |
| H | -7.06384900 | -8.14419500 | -5.64282000 | H  | 5.03247000  | -3.09197000 | -4.61839100 |
| H | -9.10694800 | -4.04870500 | -5.84643500 | H  | 3.59270800  | -3.72408400 | -5.42901100 |

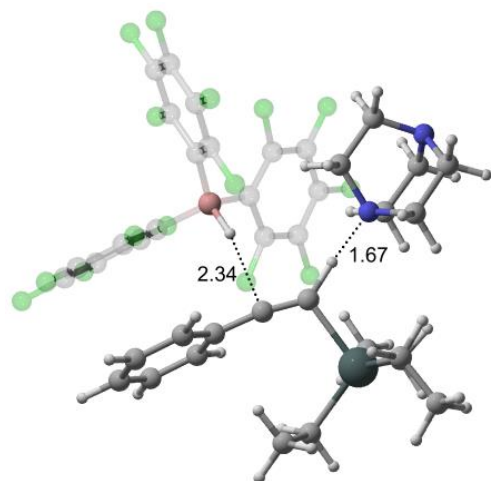

19

|   |            |             |             |   |             |             |             |
|---|------------|-------------|-------------|---|-------------|-------------|-------------|
| C | 3.18479200 | -1.18070200 | 3.01250900  | C | -2.09498800 | 3.24487100  | 1.40005300  |
| C | 2.43462300 | -1.36238900 | 1.85779000  | C | -0.49412500 | 3.23922800  | -0.31761900 |
| C | 2.61206200 | -0.48467500 | 0.76268400  | C | -2.40241900 | 4.57822100  | 1.15262900  |
| C | 3.53736600 | 0.58031000  | 0.85374500  | C | -0.76860500 | 4.57439000  | -0.60782900 |
| C | 4.27570900 | 0.75302800  | 2.01679100  | C | -1.73345700 | 5.24953800  | 0.13136300  |
| C | 4.10144700 | -0.12566400 | 3.09292600  | C | -1.96755700 | -0.11783000 | 0.75843300  |
| H | 3.04412600 | -1.84620300 | 3.85849000  | C | -3.23853300 | 0.13254000  | 0.23446800  |
| H | 1.70768600 | -2.16104000 | 1.78566600  | C | -1.70722000 | -1.47759900 | 0.95405300  |
| H | 3.63730400 | 1.26780100  | 0.02062700  | C | -4.17926100 | -0.86207900 | -0.04037800 |
| H | 4.96748400 | 1.58475900  | 2.10057200  | C | -2.60946700 | -2.50448700 | 0.70677800  |
| H | 4.66827000 | 0.02659800  | 4.00670300  | C | -3.86852600 | -2.19393400 | 0.20118000  |
| C | 1.90380300 | -0.69121900 | -0.43366700 | F | -4.75278200 | -3.16637600 | -0.07656100 |

|   |             |             |             |
|---|-------------|-------------|-------------|
| F | -2.27451100 | -3.79065600 | 0.92926200  |
| F | -0.49311500 | -1.86424400 | 1.42433900  |
| F | -3.63359800 | 1.38937700  | -0.08146000 |
| F | -5.37640800 | -0.54380000 | -0.56813300 |
| F | -2.77379000 | 2.63459300  | 2.39965100  |
| F | -3.33473700 | 5.22465200  | 1.87579300  |
| F | -2.01304300 | 6.53729200  | -0.13228400 |
| F | -0.10582400 | 5.21812800  | -1.59077200 |
| F | 0.48515700  | 2.66195600  | -1.06432600 |
| F | -1.79387500 | -0.48650300 | 3.58891500  |
| F | -0.55768100 | -0.46047700 | 5.95015600  |
| F | 1.70073200  | 1.04328500  | 6.33409000  |
| F | 2.68984800  | 2.54290700  | 4.26616300  |
| F | 1.50624800  | 2.48632000  | 1.86269900  |
| N | -0.84566400 | -0.43616000 | -3.12276700 |
| C | -1.83241200 | -1.48708200 | -2.79349500 |
| H | -2.02303800 | -1.43537400 | -1.72214600 |
| H | -1.37558300 | -2.45927700 | -3.00634300 |
| C | -0.54054000 | -0.49624600 | -4.56522800 |
| H | -0.13048600 | -1.48950400 | -4.78395400 |
| H | 0.23514700  | 0.24669000  | -4.78135700 |
| C | -1.40687800 | 0.89668500  | -2.79853400 |
| H | -0.65425800 | 1.64474500  | -3.05951900 |
| H | -1.55640000 | 0.94367200  | -1.72104200 |
| N | -2.99112700 | -0.05589600 | -4.46369900 |
| C | -1.85350400 | -0.22572100 | -5.37549000 |
| H | -1.76002800 | 0.68284200  | -5.97958700 |
| H | -2.07403600 | -1.05703500 | -6.05413600 |
| C | -3.12959400 | -1.26089900 | -3.63372900 |
| H | -3.32789200 | -2.11298800 | -4.29309700 |
| H | -4.00062100 | -1.13334600 | -2.98413800 |
| C | -2.73843400 | 1.09897400  | -3.58538800 |
| H | -3.58560100 | 1.20166500  | -2.90066700 |
| H | -2.69940500 | 2.00166600  | -4.20412900 |
| H | 0.14102900  | 0.63730700  | 0.33862300  |

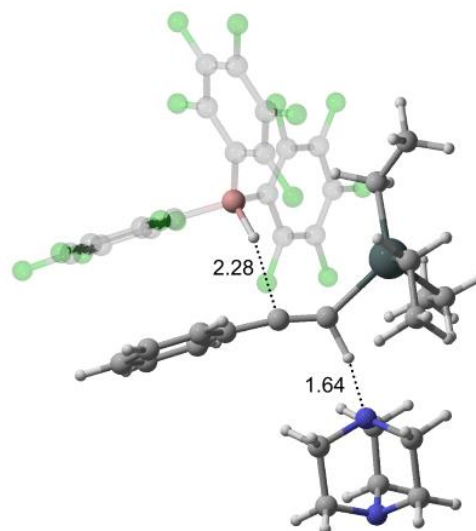

**19'**

|    |             |             |             |
|----|-------------|-------------|-------------|
| C  | 3.18851900  | 2.18660500  | 2.71901800  |
| C  | 2.86140400  | 1.64455400  | 1.48271600  |
| C  | 2.23728100  | 0.37728400  | 1.41312700  |
| C  | 1.93301000  | -0.32357300 | 2.60509600  |
| C  | 2.28210200  | 0.22329600  | 3.83304000  |
| C  | 2.90586900  | 1.47525200  | 3.89154400  |
| H  | 3.64426800  | 3.16982900  | 2.77633900  |
| H  | 3.05842000  | 2.18783000  | 0.56448200  |
| H  | 1.42721100  | -1.27813800 | 2.54438400  |
| H  | 2.04705000  | -0.31114000 | 4.74817300  |
| H  | 3.15225300  | 1.90972300  | 4.85596800  |
| C  | 1.99479200  | -0.20528900 | 0.15729600  |
| C  | 1.99734800  | -0.79211700 | -0.95226900 |
| Sn | 0.83858600  | -0.82428000 | -2.82410100 |
| C  | 1.97655600  | 0.57910700  | -3.98976600 |
| H  | 1.61259000  | 0.52223500  | -5.02373300 |
| H  | 1.72349300  | 1.58054700  | -3.62456600 |
| C  | 1.17940700  | -2.87914900 | -3.37728400 |
| H  | 0.84752000  | -3.01789700 | -4.41452000 |
| H  | 2.25893200  | -3.07345200 | -3.37234400 |
| C  | -1.26402300 | -0.43132500 | -2.82319200 |
| H  | -1.78298700 | -1.39280700 | -2.74157900 |
| H  | -1.52744100 | 0.14517100  | -1.94187800 |
| C  | 3.49311400  | 0.34775400  | -3.94112400 |
| H  | 3.76609700  | -0.64367900 | -4.32382800 |
| H  | 4.03193400  | 1.08964300  | -4.54476800 |
| H  | 3.87551900  | 0.42212400  | -2.91565900 |
| C  | 0.44196300  | -3.85687800 | -2.44674000 |
| H  | 0.64238800  | -4.90345200 | -2.71159800 |
| H  | 0.72992000  | -3.72323900 | -1.39750800 |

|   |             |             |             |    |              |             |             |
|---|-------------|-------------|-------------|----|--------------|-------------|-------------|
| H | -0.64376900 | -3.71586400 | -2.49643500 | C  | 5.10672000   | -2.63122600 | -2.21955200 |
| C | -1.68714600 | 0.31871800  | -4.09632900 | H  | 5.44651800   | -1.62982000 | -2.50011200 |
| H | -1.20483500 | 1.30042000  | -4.16359600 | H  | 4.51168900   | -3.02761400 | -3.04813100 |
| H | -1.44433700 | -0.23559000 | -5.01233000 | C  | 3.73688400   | -3.83366900 | -0.63293100 |
| H | -2.77147400 | 0.48630800  | -4.09706800 | H  | 3.18192100   | -4.25901100 | -1.47333100 |
| B | -1.27036400 | 0.77761500  | 0.74042100  | H  | 3.03361900   | -3.69614900 | 0.19488900  |
| C | -1.08179500 | 1.13920800  | 2.32126100  | N  | 6.21431000   | -3.98510700 | -0.44497400 |
| C | -0.35730500 | 2.28393600  | 2.67266400  | C  | 6.29990400   | -3.57551000 | -1.85365700 |
| C | -1.53299600 | 0.39421700  | 3.41237500  | H  | 6.29152600   | -4.47836500 | -2.47306700 |
| C | -0.09546900 | 2.67291300  | 3.98014700  | H  | 7.26057800   | -3.07383400 | -2.01003100 |
| C | -1.27892800 | 0.73448700  | 4.74138800  | C  | 6.21606100   | -2.78652300 | 0.40507300  |
| C | -0.55107600 | 1.88229800  | 5.02986000  | H  | 7.15339100   | -2.24666200 | 0.23505600  |
| C | -1.79957800 | 2.09384700  | -0.06575500 | H  | 6.20098200   | -3.10502500 | 1.45240400  |
| C | -2.93120300 | 2.81192900  | 0.32397800  | C  | 4.95928200   | -4.72103400 | -0.23199000 |
| C | -1.11336700 | 2.64150500  | -1.14641300 | H  | 4.90828900   | -5.01231200 | 0.82212500  |
| C | -3.37818700 | 3.96167500  | -0.31922500 | H  | 4.99116000   | -5.63846500 | -0.82866500 |
| C | -1.52236100 | 3.78322900  | -1.83025700 | H  | 2.92783000   | -1.49469100 | -1.13815100 |
| C | -2.66983300 | 4.44895500  | -1.41542700 |    |              |             |             |
| C | -2.09707400 | -0.60240600 | 0.41799000  |    |              |             |             |
| C | -3.35244400 | -0.70914500 | -0.18565000 |    |              |             |             |
| C | -1.47969200 | -1.83671500 | 0.63668800  |    |              |             |             |
| C | -3.93981600 | -1.91996000 | -0.55547100 |    |              |             |             |
| C | -2.01864600 | -3.06833600 | 0.28679900  |    |              |             |             |
| C | -3.26753200 | -3.11348000 | -0.32363200 |    |              |             |             |
| F | -3.80927700 | -4.28918900 | -0.68388100 |    |              |             |             |
| F | -1.34562000 | -4.21230000 | 0.52869700  |    |              |             |             |
| F | -0.26240800 | -1.88701700 | 1.24191200  |    |              |             |             |
| F | -4.07332700 | 0.39175100  | -0.49565900 |    |              |             |             |
| F | -5.14326600 | -1.94153700 | -1.15665000 |    |              |             |             |
| F | -3.65266700 | 2.39117300  | 1.38681700  |    |              |             |             |
| F | -4.48364300 | 4.60503900  | 0.09613200  | C  | -9.93801400  | -3.27107300 | -1.56630800 |
| F | -3.08560100 | 5.55262800  | -2.05868500 | C  | -10.74099600 | -3.39610200 | -2.69344600 |
| F | -0.81504500 | 4.24909600  | -2.88064500 | C  | -10.58256600 | -2.49274300 | -3.76911700 |
| F | 0.05117200  | 2.08197200  | -1.59173400 | C  | -9.62264500  | -1.45922700 | -3.68581600 |
| F | -2.26752200 | -0.72846300 | 3.23101000  | C  | -8.82869900  | -1.34438000 | -2.55199200 |
| F | -1.72676700 | -0.03971400 | 5.74784000  | C  | -8.98585300  | -2.24751200 | -1.49391200 |
| F | -0.27893400 | 2.21881000  | 6.30344700  | H  | -10.06307800 | -3.95893400 | -0.73580300 |
| F | 0.62457800  | 3.78203500  | 4.24433900  | H  | -11.49205400 | -4.17235300 | -2.75764300 |
| F | 0.15609200  | 3.08473900  | 1.70433700  | H  | -9.53821400  | -0.74974400 | -4.50201100 |
| H | -0.14558000 | 0.56582800  | 0.33135000  | H  | -8.10548100  | -0.53878400 | -2.47723200 |
| N | 4.22403100  | -2.49781300 | -1.04251300 | H  | -8.37583100  | -2.14101800 | -0.60165000 |
| C | 4.98139800  | -1.88827500 | 0.07295700  | C  | -11.35385400 | -2.62558900 | -4.94271400 |
| H | 4.30199600  | -1.79408900 | 0.92565700  | C  | -11.75554600 | -2.91671600 | -6.10050200 |
| H | 5.27464700  | -0.87817200 | -0.23192500 | Sn | -10.52120900 | -4.45629700 | -7.09806300 |

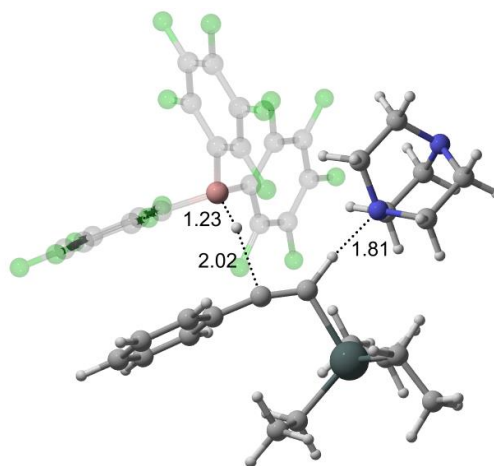

**TS17**

|   |              |             |              |   |              |             |              |
|---|--------------|-------------|--------------|---|--------------|-------------|--------------|
| C | -11.95146900 | -6.05044400 | -7.30640900  | F | -16.68809600 | -0.55741700 | -4.64516700  |
| H | -12.65178400 | -5.77394700 | -8.10409100  | F | -18.49744300 | -2.41739900 | -5.16705000  |
| H | -11.41600600 | -6.94154300 | -7.65827700  | F | -15.65232100 | 0.81070800  | -2.30544500  |
| C | -9.87193400  | -3.54630900 | -8.93561800  | F | -16.04404600 | 3.38187900  | -3.03281800  |
| H | -10.75744200 | -3.19286000 | -9.47550500  | F | -14.70804500 | 4.41957400  | -5.18653100  |
| H | -9.28641400  | -2.65571100 | -8.67795800  | F | -12.95344800 | 2.84471600  | -6.58300700  |
| C | -8.87016200  | -4.93124600 | -5.80783900  | F | -12.52394000 | 0.30570900  | -5.84987900  |
| H | -9.25003100  | -5.01724700 | -4.78323000  | F | -14.87678400 | -2.57504000 | -1.06159900  |
| H | -8.50808300  | -5.92906700 | -6.08698200  | F | -13.66005300 | -2.57190000 | 1.30792700   |
| C | -12.70192400 | -6.34873700 | -5.99839500  | F | -11.41944800 | -1.05427200 | 1.73200900   |
| H | -13.23842100 | -5.47063000 | -5.62590300  | F | -10.42971500 | 0.48772900  | -0.30457300  |
| H | -13.43879600 | -7.14967700 | -6.13459700  | F | -11.59622500 | 0.46396800  | -2.71316500  |
| H | -12.01730100 | -6.66864000 | -5.20351200  | N | -14.08445100 | -2.40480100 | -7.81162800  |
| C | -9.04586500  | -4.50569200 | -9.80895800  | C | -15.01143800 | -3.49974200 | -7.45950500  |
| H | -8.71455300  | -4.01555100 | -10.73328900 | H | -15.21851300 | -3.42641500 | -6.39226000  |
| H | -8.14596100  | -4.85721300 | -9.28910700  | H | -14.49524700 | -4.45002200 | -7.63349600  |
| H | -9.62393000  | -5.39117000 | -10.10129900 | C | -13.75952800 | -2.49780600 | -9.24704700  |
| C | -7.72742100  | -3.90540300 | -5.87436400  | H | -13.28047800 | -3.46839400 | -9.42514300  |
| H | -7.31559900  | -3.82072800 | -6.88721200  | H | -13.03226300 | -1.71311400 | -9.48413400  |
| H | -8.06211300  | -2.90785900 | -5.56965500  | C | -14.73384300 | -1.10054600 | -7.54942000  |
| H | -6.90256800  | -4.18688200 | -5.20768900  | H | -14.02533400 | -0.31639700 | -7.82946100  |
| H | -12.65852600 | -2.63079000 | -6.72004000  | H | -14.90757300 | -1.01923300 | -6.47669800  |
| B | -13.84176500 | -1.09624400 | -3.56936800  | N | -16.23432100 | -2.20877600 | -9.19520800  |
| C | -13.27583100 | -1.09060200 | -2.03819100  | C | -15.07403300 | -2.34687800 | -10.08525600 |
| C | -12.14903700 | -0.31236300 | -1.74714700  | H | -15.03013600 | -1.46186700 | -10.72913000 |
| C | -13.75842100 | -1.82109300 | -0.95047400  | H | -15.23443500 | -3.21952300 | -10.72832700 |
| C | -11.52273400 | -0.27461800 | -0.50754400  | C | -16.31143200 | -3.38557500 | -8.31721700  |
| C | -13.15534100 | -1.82713500 | 0.30732600   | H | -16.45432200 | -4.27338800 | -8.94330400  |
| C | -12.02223200 | -1.05386800 | 0.53055300   | H | -17.19631300 | -3.28216900 | -7.68119200  |
| C | -14.10057800 | 0.43217900  | -4.05770300  | C | -16.06243700 | -1.00657200 | -8.36206000  |
| C | -14.96582100 | 1.28377100  | -3.37115400  | H | -16.92701500 | -0.92577900 | -7.69541200  |
| C | -13.43233300 | 1.01694300  | -5.12946900  | H | -16.06589600 | -0.12939800 | -9.01812700  |
| C | -15.18633100 | 2.61076600  | -3.72437800  | H | -12.89593500 | -1.52254400 | -4.23236800  |
| C | -13.62247000 | 2.33835600  | -5.52694600  |   |              |             |              |
| C | -14.50965200 | 3.14256700  | -4.81991100  |   |              |             |              |
| C | -15.05932000 | -2.14295700 | -3.87969500  |   |              |             |              |
| C | -16.32855400 | -1.83455500 | -4.37785800  |   |              |             |              |
| C | -14.84604800 | -3.51487100 | -3.71322100  |   |              |             |              |
| C | -17.30573100 | -2.78957000 | -4.66489900  |   |              |             |              |
| C | -15.78599000 | -4.50349600 | -3.97483200  |   |              |             |              |
| C | -17.03832600 | -4.13685200 | -4.45885100  |   |              |             |              |
| F | -17.95840100 | -5.07027100 | -4.74928600  |   |              |             |              |
| F | -15.49354600 | -5.80442000 | -3.78616700  |   |              |             |              |
| F | -13.64584000 | -3.95349400 | -3.25553900  |   |              |             |              |

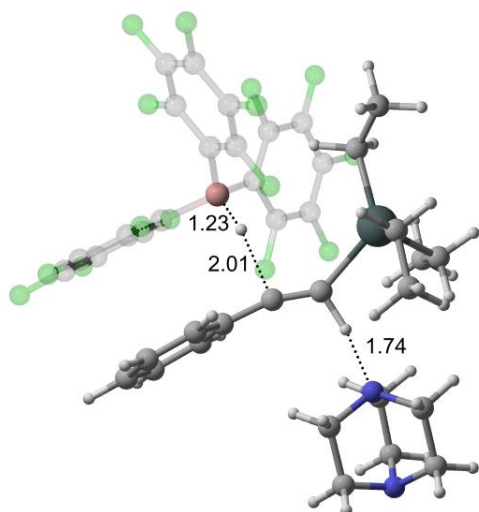

**TS17'**

|    |              |             |             |   |              |             |             |
|----|--------------|-------------|-------------|---|--------------|-------------|-------------|
| C  | -8.61126300  | -0.42917700 | -2.09608500 | H | -12.63380900 | -6.26109700 | -7.15954300 |
| C  | -9.05204200  | -0.92422700 | -3.31729500 | C | -13.62710900 | -2.12848300 | -8.94999900 |
| C  | -9.70409800  | -2.17688400 | -3.37560500 | H | -13.11778100 | -1.15849600 | -8.97543400 |
| C  | -9.92366900  | -2.91011600 | -2.18613900 | H | -13.37209600 | -2.66108600 | -9.87525200 |
| C  | -9.46812300  | -2.40778200 | -0.97324200 | H | -14.70640900 | -1.93252100 | -8.97536800 |
| C  | -8.81557500  | -1.17029900 | -0.92602100 | B | -13.10439500 | -1.83972300 | -4.02850300 |
| H  | -8.12791800  | 0.54140000  | -2.04810200 | C | -12.89609900 | -1.49040000 | -2.45137900 |
| H  | -8.92103000  | -0.35470700 | -4.23129300 | C | -12.17449700 | -0.34286400 | -2.09977300 |
| H  | -10.44644000 | -3.85579200 | -2.23394100 | C | -13.32145900 | -2.25209500 | -1.36053900 |
| H  | -9.63838500  | -2.96891000 | -0.05958400 | C | -11.88415000 | 0.02840100  | -0.79332200 |
| H  | -8.48276800  | -0.77216300 | 0.02813300  | C | -13.04136700 | -1.92710900 | -0.03330000 |
| C  | -10.06795000 | -2.70202800 | -4.63388600 | C | -12.31163200 | -0.78015400 | 0.25461600  |
| C  | -10.03118800 | -3.26085400 | -5.76572800 | C | -13.62637100 | -0.52082300 | -4.82962100 |
| Sn | -11.16275700 | -3.37589600 | -7.63911800 | C | -14.75825800 | 0.19114700  | -4.42933100 |
| C  | -9.99801300  | -2.04956400 | -8.86824300 | C | -12.95065700 | 0.03111100  | -5.91382400 |
| H  | -10.35620400 | -2.15195400 | -9.90071000 | C | -15.21373700 | 1.34097600  | -5.06600700 |
| H  | -10.23461000 | -1.02609600 | -8.55641300 | C | -13.36811900 | 1.17340200  | -6.59122700 |
| C  | -10.82799300 | -5.45366500 | -8.10143800 | C | -14.51460700 | 1.83416100  | -6.16567200 |
| H  | -11.16757200 | -5.63960000 | -9.12873400 | C | -13.91960100 | -3.21932900 | -4.36227600 |
| H  | -9.74674000  | -5.63948400 | -8.09673100 | C | -15.17093200 | -3.31938100 | -4.97736100 |
| C  | -13.25672300 | -2.92776300 | -7.69046200 | C | -13.32258100 | -4.45847000 | -4.11363600 |
| H  | -13.80082100 | -3.87831500 | -7.65424300 | C | -15.77432700 | -4.52828100 | -5.32511400 |
| H  | -13.53618600 | -2.37205300 | -6.79968900 | C | -13.88059000 | -5.68864700 | -4.43774500 |
| C  | -8.48552100  | -2.30330000 | -8.79850700 | C | -15.12455300 | -5.72697200 | -5.05809100 |
| H  | -8.22814200  | -3.31788700 | -9.12687500 | F | -15.68216100 | -6.90047600 | -5.39686300 |
| H  | -7.93075700  | -1.60329100 | -9.43689900 | F | -13.23060600 | -6.83631500 | -4.16142100 |
| H  | -8.10619300  | -2.18316500 | -7.77635400 | F | -12.11463200 | -4.51492100 | -3.49324800 |
| C  | -11.54669900 | -6.39649500 | -7.12243800 | F | -15.87284300 | -2.21482600 | -5.31523600 |
| H  | -11.34627200 | -7.45183500 | -7.34958700 | F | -16.97151500 | -4.54322000 | -5.93753400 |
| H  | -11.23957800 | -6.22107500 | -6.08499700 | F | -15.47343600 | -0.24036500 | -3.36676600 |
|    |              |             |             | F | -16.31915800 | 1.97741700  | -4.64191100 |
|    |              |             |             | F | -14.93878700 | 2.93764100  | -6.80226300 |
|    |              |             |             | F | -12.67082600 | 1.64277100  | -7.64572000 |
|    |              |             |             | F | -11.79069800 | -0.52781100 | -6.36890900 |
|    |              |             |             | F | -14.05544500 | -3.37430000 | -1.54065100 |
|    |              |             |             | F | -13.46509000 | -2.71564200 | 0.97149500  |
|    |              |             |             | F | -12.01590100 | -0.45908400 | 1.52569400  |
|    |              |             |             | F | -11.16858500 | 1.13919300  | -0.53026700 |
|    |              |             |             | F | -11.69516900 | 0.47892600  | -3.06724000 |
|    |              |             |             | H | -11.96076900 | -2.05073900 | -4.44011000 |
|    |              |             |             | N | -7.67072500  | -4.90614900 | -5.82859700 |
|    |              |             |             | C | -6.86479300  | -4.21752300 | -4.79763000 |
|    |              |             |             | H | -7.51651500  | -4.01525300 | -3.94216700 |
|    |              |             |             | H | -6.54514800  | -3.25338400 | -5.20776300 |

|   |             |             |             |   |             |             |             |
|---|-------------|-------------|-------------|---|-------------|-------------|-------------|
| C | -6.82327500 | -5.18485800 | -7.00452200 | H | -4.67585600 | -5.66530600 | -6.80069700 |
| H | -6.46284900 | -4.22799400 | -7.39456100 | C | -5.65067400 | -5.11904000 | -4.40302900 |
| H | -7.45048200 | -5.64505100 | -7.77501100 | H | -4.70027700 | -4.62974600 | -4.64151200 |
| C | -8.18239600 | -6.17956600 | -5.27786600 | H | -5.65241800 | -5.33630600 | -3.32971900 |
| H | -8.77548900 | -6.66662100 | -6.05734100 | C | -6.97834600 | -7.06588800 | -4.82378900 |
| H | -8.85712400 | -5.94161300 | -4.44866500 | H | -7.00993600 | -7.25674900 | -3.74595700 |
| N | -5.70727000 | -6.39337300 | -5.13341600 | H | -6.98813800 | -8.03552800 | -5.33263900 |
| C | -5.64562700 | -6.12255200 | -6.57699100 | H | -9.06407200 | -3.86958700 | -5.94105600 |
| H | -5.69120300 | -7.08045500 | -7.10591300 |   |             |             |             |
